# Supplementary material for: Impact of patient characteristics on the Canadian Patient Experiences Survey–Inpatient Care: survey analysis from an academic tertiary care centre
Source: PubMed Central journal article supplement — BMJ Open. 2018 Aug 30;8(8):e021575. doi: 10.1136/bmjopen-2018-021575 (PMC6119436; doi:10.1136/bmjopen-2018-021575), 2018-08-30
Supplement: bmjopen-2018-021575.draft_revisions.pdf [file bmjopen-2018-021575.draft_revisions.pdf]

# BMJ Open

BMJ Open is committed to open peer review. As part of this commitment we make the peer review history of every article we publish publicly available.

When an article is published we post the peer reviewers' comments and the authors' responses online. We also post the versions of the paper that were used during peer review. These are the versions that the peer review comments apply to.

The versions of the paper that follow are the versions that were submitted during the peer review process. They are not the versions of record or the final published versions. They should not be cited or distributed as the published version of this manuscript.

BMJ Open is an open access journal and the full, final, typeset and author-corrected version of record of the manuscript is available on our site with no access controls, subscription charges or pay-per-view fees (<http://bmjopen.bmj.com>).

If you have any questions on BMJ Open's open peer review process please email [info.bmjopen@bmj.com](mailto:info.bmjopen@bmj.com)

# BMJ Open

## Impact of patient characteristics on the Canadian Patient Experiences Survey – Inpatient Care survey- analysis from an academic tertiary care centre

|                               |                                                                                                                                                                                                                                                                                                                              |
|-------------------------------|------------------------------------------------------------------------------------------------------------------------------------------------------------------------------------------------------------------------------------------------------------------------------------------------------------------------------|
| Journal:                      | <i>BMJ Open</i>                                                                                                                                                                                                                                                                                                              |
| Manuscript ID                 | bmjopen-2018-021575                                                                                                                                                                                                                                                                                                          |
| Article Type:                 | Research                                                                                                                                                                                                                                                                                                                     |
| Date Submitted by the Author: | 11-Jan-2018                                                                                                                                                                                                                                                                                                                  |
| Complete List of Authors:     | Rubens, F; University of Ottawa Heart Institute, Surgery<br>Rothwell, Diana; Ottawa Hospital Research Institute<br>Al Zayadi, Amal; Ottawa Hospital Research Institute<br>Sundaresan, Sudhir; The Ottawa Hospital<br>Ramsay, Tim; The Ottawa Health Research Institute,<br>Forster, Alan; Ottawa Hospital Research Institute |
| Keywords:                     | HEALTH SERVICES ADMINISTRATION & MANAGEMENT, Patient Experience, Organisation of health services < HEALTH SERVICES ADMINISTRATION & MANAGEMENT                                                                                                                                                                               |
|                               |                                                                                                                                                                                                                                                                                                                              |

SCHOLARONE™  
Manuscripts

Peer Review Only

1  
2  
3 Impact of patient characteristics on the Canadian Patient Experiences Survey – Inpatient  
4  
5 Care survey- analysis from an academic tertiary care centre  
6  
7  
8  
9

10 Rubens FD<sup>1</sup>, Rothwell DM<sup>2</sup>, Al Zayadi A<sup>2</sup>, Sundaresan S<sup>1</sup>, Ramsay T<sup>2</sup>, Forster A<sup>2,3</sup>

11  
12 1- Department of Surgery, University of Ottawa

13  
14 2- Clinical Epidemiology, Ottawa Hospital Research Institute

15  
16 3- Department of Medicine, University of Ottawa  
17  
18  
19  
20

21 Corresponding author:

22 Fraser Rubens MD MSc FACS FRCSC

23  
24 Professor of Surgery

25  
26 Division of Cardiac Surgery

27  
28 University of Ottawa Heart Institute

29  
30 40 Ruskin St.

31  
32 Ottawa, Ontario

33  
34 Canada

35  
36 K1Y 4W7

37  
38 Fax: 613 696 7303

39  
40 [frubens@ottawaheart.ca](mailto:frubens@ottawaheart.ca)  
41  
42  
43  
44  
45  
46  
47  
48

49 Total word count (figures): 5967

50  
51 Abstract word count: 245

52  
53 Running title: Patient experience covariates  
54  
55  
56  
57  
58  
59  
60

**Abstract:**

Objective: To determine the role of patient demographics, care domains and self-perceived health status in the analysis and interpretation of results from the Canadian Patient Experience Survey-Inpatient Care (CPES-IC).

Design: Cross-sectional survey

Setting: Single large Canadian two campus tertiary care academic centre

Participants: Random sampling of hospital patients post-discharge

Intervention and Main Outcome Measures: Logistic regression models were developed to analyze topbox scoring on four questions of global care (rate experience, recommend hospital, rate hospital, overall helped). Means of each composite domain were correlated to the four overall scores at the patient level to determine Spearman's rank correlation coefficients which were plotted against the overall (hospital) domain score for the key driver analysis.

Results: Topbox scoring was decreased with worse degrees of perceived physical and mental health in all four global questions ( $p < 0.001$ ). Female gender and higher levels of education were associated with worse scoring on rate experience, recommend hospital and rate hospital ( $p < 0.001$ ). Whereas there was a significant difference between hospital departments in unadjusted measures, these differences were no longer evident after adjustment with patient covariates. Key driver analysis identified person-centred care, care transition and the domain related to emergency admission as areas of highest potential for improvement.

Conclusions: Global measures of overall care are influenced by patient-perceived physical and mental health. Caution should be exercised in using patient-satisfaction surveys to compare performance between different health-care provision entities, as

1  
2  
3  
4  
5  
6  
7  
8  
9  
10  
11  
12  
13  
14  
15  
16  
17  
18  
19  
20  
21  
22  
23  
24  
25  
26  
27  
28  
29  
30  
31  
32  
33  
34  
35  
36  
37  
38  
39  
40  
41  
42  
43  
44  
45  
46  
47  
48  
49  
50  
51  
52  
53  
54  
55  
56  
57  
58  
59  
60

apparent differences could be explained by variation in patient mix rather than variation in performance.

For peer review only

1  
2  
3 Strengths and Limitations of Study:  
4

- 5 1) This study has demonstrated conclusively that patient-perceived measures of  
6 physical and mental health must be taken into account when analyzing data from  
7 patient experience surveys  
8  
9  
10  
11  
12 2) Patient demographics such as sex and level of education influence patient  
13 experience survey responses  
14  
15  
16  
17 3) The study supports that survey data must be adjusted to account for patient  
18 variables before comparison of groups such as hospital departments.  
19  
20  
21  
22  
23  
24  
25  
26  
27  
28  
29  
30  
31  
32  
33  
34  
35  
36  
37  
38  
39  
40  
41  
42  
43  
44  
45  
46  
47  
48  
49  
50  
51  
52  
53  
54  
55  
56  
57  
58  
59  
60

## Introduction

Patient experience is now recognized as a critical component of modern health care delivery<sup>1</sup>. Aside from the clear rationale to routinely provide compassionate care, there exists a strong ethical basis for physicians to support excellence in this area as it is of vital interest to patients and governments as a foundation of patient-centred medicine<sup>2</sup>.

There is also supportive evidence that improved patient experience may positively impact outcomes<sup>1 3</sup> particularly through better compliance to evidence-based guidelines, such as in areas of chronic disease management<sup>4</sup>.

There are many different processes by which inpatient patient experience has been measured internationally<sup>5-8</sup>. In the United States, it is measured using the Hospital Consumer Assessment of Health-Care Provider Systems (HCAHPS) survey<sup>9</sup>. Hospital funding from Medicare is partially dependent on the results from this survey and thus health care organizations are deeply committed to improving results. A modification of the HCAHPS survey (Canadian Patient Experience Survey – Inpatient Care, CPES-IC) was developed through collaboration between the Canadian Institute for Health information (CIHI), Accreditation Canada, the Canadian Patient Safety Institute, the Change Foundation and the Inter-Jurisdictional Patient Experience Group and this survey is now routinely administered in four provinces in Canada<sup>10</sup>.

Though the HCAHPS and the CPES-IC are very similar, there are subtle differences that reflect the unique nature of the single-payer system in Canada. The CPES-IC survey consists of 22 questions derived from the HCAHPS as well as other questions that “address key areas relevant to the Canadian context”. The questions can be classified in

1  
2  
3 three specific groups. In the first group, individual questions can be clustered as they  
4 reflect care in particular domains such as doctor communication skills (3 questions) and  
5 nursing communication skills (3 questions) amongst others. The Canadian survey  
6 includes the same domains as the HCAHPS, but also comprises several questions that  
7 constitute new domains not addressed in the HCAHPS survey such as admission  
8 experience, person-centred care, discharge and transition. Further details regarding  
9 differences between the Canadian and American surveys are available on the CIHI web-  
10 site (<https://www.cihi.ca/en/patient-experience>).

11  
12 The composite questions for each domain can be averaged to provide a mean value which  
13 is currently reported at the hospital level for the HCAHPS survey<sup>11</sup>. In the second group  
14 there are four questions that reflect overall care that are of particular importance at the  
15 institutional level to assess the quality of patient experience. One of these questions is  
16 also used as a corporate measure of key interest (“Rate your experience?”) and it is most  
17 commonly used to rank hospitals nationally after adjustment for regional differences<sup>3</sup>.

18  
19 Results from the three other questions related to overall care include; “Would you  
20 recommend this hospital to your friends and family?” (recommend hospital) and “Using  
21 any number from 0 to 10, where 0 is the worst hospital possible and 10 is the best  
22 hospital possible, what number would you use to rate this hospital during your stay?”  
23 (rate hospital) and “Overall, do you feel you were helped by your hospital stay?” (overall  
24 helped). Success in these and other questions are measured by the percent of “topbox”  
25 designation by the patients in which they have ranked a 4 on the recommend hospital  
26 question (on a scale of 1 to 4) or 9 or 10 out of an ordinal scale of 10 for the remaining  
27  
28  
29  
30  
31  
32  
33  
34  
35  
36  
37  
38  
39  
40  
41  
42  
43  
44  
45  
46  
47  
48  
49  
50  
51  
52  
53  
54  
55  
56  
57  
58  
59  
60



1  
2  
3 three questions. The “topbox” metric has been validated and accepted as a marker of  
4  
5 excellence in patient experience measurement.<sup>12</sup>  
6

7  
8 The final group of questions found in both surveys consists of inquiries regarding patient-  
9  
10 perceived health status as well as demographic topics such as race and education. These  
11  
12 questions are referred to a Patient Mix Adjusters (PMA) and they are used in the  
13  
14 HCAHPS survey in order to provide risk adjustment, particularly when comparing  
15  
16 between geographic regions. The PMA questions for the HCAHPS are re-assessed  
17  
18 quarterly by the Centre for Medicare and Medicaid (CMS) after reviewing national  
19  
20 results.  
21  
22

23  
24 There is limited familiarity in the assessment of patient experience in Canada and the use  
25  
26 of such surveys. Although it has been demonstrated that patient sociodemographic factors  
27  
28 such as age, ethnicity, sex and socioeconomic class have been shown to influence patient  
29  
30 experience responses<sup>13</sup>, there is also no understanding of the validity of the PMA  
31  
32 questions in adjusting the results of the CPES-IC survey and how they may contribute to  
33  
34 credibly compare units or departments within a hospital. In summary, it is not clear how  
35  
36 patient factors such as self-described characteristics including perception of mental and  
37  
38 physical health, patient demographics and co-morbidities impact the results of the  
39  
40 Canadian survey on in-hospital patient experience.  
41  
42  
43  
44  
45  
46

47  
48 The overall objective of this research was to compare the value of the self-described  
49  
50 patient characteristics obtained from the survey with covariates obtained from a hospital  
51  
52 database, in the development of a statistical model to predict topbox scoring in the four  
53  
54 survey questions related to overall care; a) rate your experience b) recommend hospital c)  
55  
56  
57  
58  
59  
60

1  
2  
3 rate hospital d) overall helped. We also sought to assess how the PMA questions and  
4  
5 other data from the hospital database influence patient experience at the hospital and  
6  
7 departmental level and to determine how the composite domain measurements influence  
8  
9 the four adjusted global measurements.  
10  
11  
12  
13

## 14 **Methods**

15  
16 This analysis was conducted as a Quality Assurance project. The Ethics Committee  
17  
18 reviewed the protocol and individual patient consent was waived. Data was collected  
19  
20 from April 1, 2016 to Nov 30, 2016 from the CPES-IC Survey (see appendix 1)  
21  
22 administered by National Research Corporation (Markham, Ontario).  
23  
24  
25

26 The data was merged with administrative data collected from The Ottawa Hospital Data  
27  
28 Warehouse (TOHDW) which is a relational database that contains administrative and  
29  
30 clinical data for all patients seen at The Ottawa Hospital. Deciles of income class were  
31  
32 derived using the Postal Code Conversion File Version 6.6 based on data from August  
33  
34 2015 (Statistics Canada). The Elixhauser class was derived using a modification of the  
35  
36 Elixhauser comorbidity measure after applying the latter to the hospital data (ref van  
37  
38 Walraven Med Care 2009). The occurrence of a patient safety indicator (psi) event (i.e.  
39  
40 an in-hospital adverse event) was determined using ICD-10 coding from administrative  
41  
42 data <sup>14</sup>.  
43  
44  
45

46 The Ottawa Hospital is a large academic tertiary care teaching centre with two inpatient  
47  
48 campuses. There are 6 admitting departments (Surgery, Medicine, Obstetrics-  
49  
50 Gynecology, ENT, Family Medicine, Ophthalmology and Psychiatry). A different survey  
51  
52 was used in Psychiatry thus these patients were excluded. Ophthalmology was excluded  
53  
54  
55  
56  
57  
58  
59  
60

1  
2  
3 as it is primarily an outpatient service and accounts for less than 1% of admissions. Data  
4 from otolaryngology (ENT) was merged with Surgery due to the combined collaborative  
5 quality process. Data from one surgical and one medical division was not available due to  
6 inability to merge to administrative data.  
7  
8  
9  
10

11 Composite domains were identified as follows: communication with doctors (questions 5-  
12 7), communication with nurses (questions 1-3), responsiveness of staff (questions 4, 11),  
13 communication of medications (questions 16, 17), transition of care (37-39), person-  
14 centred care (30-36), direct admission (questions 24, 25) and emergency admission (26-  
15 29). The mean was calculated for each patient for each domain as long as more than 50%  
16 of the questions in the domain were reported<sup>15</sup>. Spearman's rank correlation coefficients  
17 were determined for the continuous value of each domain and the ordinal global question  
18 score and this was plotted against the overall (hospital) domain score for the key driver  
19 analysis<sup>16</sup>. The median value of the domain scores was used for the vertical separation of  
20 the quadrants due to skewness. Points identified in quadrant 1 represent domains with  
21 increased potential for improvement due to high correlation with a global score and lower  
22 mean value.  
23  
24  
25  
26  
27  
28  
29  
30  
31  
32  
33  
34  
35  
36  
37  
38  
39

#### 40 Statistical Analyses:

41 Patient characteristics across department groups were compared using a chi square test.

42 Distribution normality of covariates was tested using the Shapiro-Wilk test.

43 For categorical variables with equal variances, oneway analysis of variance was used to  
44 compare departments, whereas Kruskal-Wallis equality of populations rank test was used  
45 for categorical groups with unequal variances.  
46  
47  
48  
49  
50  
51  
52  
53  
54  
55  
56  
57  
58  
59  
60

1  
2  
3 Multivariable logistic models were developed to test the primary outcomes from the  
4 overall care questions (a) rate experience b) recommend hospital c) rate hospital d)  
5 overall helped) reported as dichotomous outcomes representing “topbox” response (9 or  
6 10) or no topbox (<9). The association of each covariate was assessed using likelihood  
7 ratio tests. Bonferroni correction was used for multiple pairwise comparisons. A p value  
8 of < 0.05 was considered significant. Analyses were completed using STATA™ vers.  
9 14.2 (College Station, Tx).

## 23 **Results**

### 24 **Patient Characteristics**

25  
26 There were 2989 patients who responded to the survey representing hospital admissions  
27 under the care of 295 physicians (146 medicine, 110 surgery/ENT, 22 family, 17  
28 obstetrics/gynecology.). Admissions including maternity, rehabilitation and mental health  
29 were excluded. The institution consists of 918 inpatient beds geographically situated at 2  
30 campuses. Characteristics of the patients from the total group and from each department  
31 are presented in Table 1. There were significant differences between the department  
32 groups in terms of physical and mental health, Elixhauser class, admission status, length  
33 of stay, marital status and sex.  
34  
35  
36  
37  
38  
39  
40  
41  
42  
43  
44  
45

### 46 **Topbox Analysis – Overall Measures**

47  
48 The results of the multivariable analyses in the derivation of the model for the overall  
49 measures (rate experience, recommend hospital, rate hospital and overall helped) are  
50 presented in Tables 2-5. Topbox scoring was decreased with worse degrees of perceived  
51  
52  
53  
54  
55  
56  
57  
58  
59  
60

1  
2  
3 physical and mental health in all four of the questions. There was a significant  
4 relationship with age group in all questions with lowest odds ratios in patients between  
5 the ages of 18-34 years. On pairwise comparison the predicted scores in this group were  
6 significantly lower than those in the age groups of 55-64 years and 65-79 years ( $p<0.05$ ).  
7  
8 Increased level of education and female sex were associated with worse scoring in rate  
9 experience, recommend hospital and rate hospital questions. Covariates from the  
10 institutional database that were significant contributors to the models included discharge  
11 disposition to a facility (recommend and rate hospital), marital status (recommend  
12 hospital) and ICU stay (rate hospital). Campus site was found to be a factor as a random  
13 effect in rate hospital ( $p<0.05$ ).  
14  
15 Adjusted and unadjusted department-based predicted measures for rate experience, and  
16 recommend hospital are presented in Figures 1 - 4. Unadjusted pairwise comparison of  
17 rate experience demonstrated a greater likelihood of topbox scoring with surgery as  
18 compared to medicine however this was not significant ( $p=0.054$ ). This difference was  
19 not seen after adjustment ( $p=0.911$ ). Unadjusted pairwise comparison of the question rate  
20 hospital demonstrated a significant increase in surgery as compared to family medicine,  
21 however this difference was not present in the adjusted model. Unadjusted analysis of the  
22 overall helped question demonstrated greater likelihood of topbox scoring in surgery as  
23 compared to medicine and family medicine, as well as obstetrics gynecology as  
24 compared to family medicine ( $p<0.05$ ) however these comparisons were no longer  
25 significant after adjustment for the covariates in the model.  
26  
27  
28  
29  
30  
31  
32  
33  
34  
35  
36  
37  
38  
39  
40  
41  
42  
43  
44  
45  
46  
47  
48  
49  
50

## 51 Key Driver Analysis

52  
53  
54  
55  
56  
57  
58  
59  
60

1  
2  
3 Key driver analysis of the global question of rate experience is presented in figure 5.

4  
5 Common domains present in quadrant 1 in all four questions include person-centred care,  
6  
7 care transition and the domain related to emergency admission processes. Similar patterns  
8  
9  
10 were seen with the other three global questions (results not shown).  
11  
12  
13

## 14 **Discussion**

15  
16 Results from the CPES-IC survey administered to patients discharged from a large  
17  
18 Canadian multi-campus health institution were analyzed after merging with a  
19  
20 comprehensive administrative database. Two patient-answered demographic questions  
21  
22 collected from the survey (patient-perceived overall physical and mental health) were  
23  
24 significant covariates predicting topbox recognition in all four of the overall care  
25  
26 questions. Increasing level of education and female sex were associated with decreased  
27  
28 topbox scoring in rate experience, recommend hospital and rate hospital. Discharge to a  
29  
30 non-home environment was associated with lower topbox scoring on recommend and rate  
31  
32 hospital. The only significant contributors to the models from the hospital database  
33  
34 included marital status (recommend hospital), and ICU stay (rate hospital). Economic  
35  
36 status, in-hospital adverse events and Elixhauser co-morbidity class did not significantly  
37  
38 contribute to the models for the four questions related to overall care. After adjustment,  
39  
40 there was no significant difference in the predicted measures between the four major  
41  
42 departments in any of the four questions that related to the overall patient experience.  
43  
44  
45 Finally, key driver analysis using these models, confirmed that the greatest yield for  
46  
47 interventions at the hospital level include efforts to improve person-centred care, care  
48  
49 transition and the experience for those being admitted through the emergency department.  
50  
51  
52  
53  
54  
55  
56  
57  
58  
59  
60

1  
2  
3 Patient experience has become a focus of the health care evolution and it has been  
4  
5 recognized as a key interest to consumers and patient advocacy groups. The Institute of  
6  
7 Healthcare Improvement (IHI) a leader in the transformation of the health care system,  
8  
9 has advocated the goal of improving the experience of care within its triple aim of quality  
10  
11 <sup>17</sup>. The Affordable Care Act in collaboration with the Centers for Medicare and Medicaid  
12  
13 Services (CMS) <sup>12</sup> has emphasized the need to deliver care that provides a quality patient  
14  
15 experience. The act has integrated patient experience scores as well as reporting  
16  
17 mandates into hospital reimbursement strategies, which further incentivize excellence.  
18  
19 Patient experience scores are reported nationally in the US<sup>18</sup> and they may be a source of  
20  
21 pride and engagement for health care teams and utilized to compete for patients.  
22  
23  
24  
25  
26 The environment is different in Canada as there is currently no financial benefit and  
27  
28 competition between institutions is not a driver for patient services. On the other hand,  
29  
30 federal and provincial government health organizations have embraced patient experience  
31  
32 as a priority for health care and they have initiated legislation to support its significance  
33  
34 in quality delivery. Future public reporting of CPES-IC results and national  
35  
36 benchmarking will motivate quality improvement in this area and patient experience  
37  
38 surveying is currently mandatory for hospital accreditation. In Ontario, the Excellent  
39  
40 Care for All Act (2010) established that hospitals must develop sustained processes to  
41  
42 address and improve the patient experience<sup>19</sup>. Our own Institution has raised the profile  
43  
44 of patient experience to the level of a corporate target by integrating it as a foundation of  
45  
46 the vision of the hospital with a priority equal to other quality outcomes and efficiency.  
47  
48 In order to strategize to bring about improvements in patient experience, it is essential to  
49  
50 understand how the current American-based survey applies to Canadian culture and our  
51  
52  
53  
54  
55  
56  
57  
58  
59  
60

1  
2  
3 single-payer system. Specifically it is crucial to appreciate how to adjust for patient  
4 demographics within different settings, not just to externally compare with other urban  
5 institutions, but also to begin to internally identify factors that may influence overall  
6 scoring and interpretation.  
7  
8  
9

10  
11  
12 The current study is not the first to examine the role of patient and other covariates in the  
13 modeling of measures of overall patient experience in Canada<sup>20</sup>. However in the latter  
14 work, the analysis involved the HCAHPS survey focusing on the single question of rate  
15 experience. The authors did demonstrate a similar relationship with higher level of  
16 education, urgent admission status and longer length of stay as predictive of poorer  
17 measures of experience rating however they did not include patient-perceived physical  
18 and mental health status, both of which were the most consistent and significant  
19 predictors of overall care.  
20  
21  
22  
23  
24  
25  
26  
27  
28  
29

30  
31 It may not be feasible to generalize from the analysis at a single hospital due to the  
32 differing contributions of the patient covariates and interactions with the specific domains  
33 of patient care at each hospital across the country<sup>21</sup>. For example, race was not found to  
34 be a significant factor for most questions unlike in the United States<sup>21</sup>. This finding may  
35 only be relevant in the context of our centre (a medium-sized Canadian city), whereas it  
36 may not apply to larger metropolitan centers such as Toronto and Montreal, where there  
37 may be greater ethnic diversity. On the other hand, the finding that women are less likely  
38 to provide a topbox scoring on questions of overall experience is in keeping with  
39 previous findings with the HCAHPS survey<sup>22</sup>.  
40  
41  
42  
43  
44  
45  
46  
47  
48  
49  
50

51 Patient experience key driver analysis has been utilized to focus attention and initiatives  
52 in patient-care areas with high potential to impact on the overall global measures of care.  
53  
54  
55  
56  
57  
58  
59  
60



1  
2  
3 The new CPES-IC survey has been designed to not only include domains currently in the  
4 HCAHPS survey, but also domains reflecting patient-centred care, transition of care and  
5 the processes of direct or emergency admission. Although these new domains have not  
6 been formally validated in the Canadian context, they were all identified as areas of  
7 potential high yield in our study in terms of overall contribution to the patient experience.  
8 Many of these questions refer to key issues of team communication and the perception of  
9 coordination of care; items that could be addressed through team re-structuring,  
10 checklists and scheduling. On the other hand, nursing and doctor communication skills,  
11 though important, did not support targets of high yield in terms of hospital resources.  
12 There are multiple important implications of this work. The analysis highlights the  
13 differences in adjusted and unadjusted rankings between departments, which emphasize  
14 the importance of the use of the demographic covariates obtained from the survey such as  
15 perception of physical and mental health and education level. The adjusted improved  
16 measures in Medicine and Family Medicine underscore that chronic disease and  
17 comorbidity must be taken into account in patient experience initiatives. Recognition of  
18 adjusted results also enhances engagement of staff who face the challenges of chronic  
19 disease care and provides the opportunity to follow for improvements.  
20 The analysis may be limited by unknown and unmeasured covariates. Only a few of the  
21 covariates from the administrative database were significant in models describing  
22 perceptions of excellence in individual questions of overall care (length of stay, ICU stay,  
23 marital status). Further work will be necessary to determine if these administrative  
24 database variables are important at model development at the unit or provider level.  
25 Although there was no difference between departments in any of the questions, more  
26  
27  
28  
29  
30  
31  
32  
33  
34  
35  
36  
37  
38  
39  
40  
41  
42  
43  
44  
45  
46  
47  
48  
49  
50  
51  
52  
53  
54  
55  
56  
57  
58  
59  
60

1  
2  
3 subtle comparisons such as between divisions and services may be important in  
4  
5 understanding how to advance patient experience initiatives. Finally, patient care  
6  
7 domains were not included as covariates in the derivation of the multivariable models for  
8  
9 the global overall questions. We elected not to do this as we felt the domains as  
10  
11 covariates would demonstrate significant bias due to their correlation not only to the  
12  
13 outcomes but also to many of the other predictors. Therefore, we elected rather to look at  
14  
15 their interactions and correlations using key driver analysis.  
16  
17

18  
19 In summary, this analysis provides a perspective on drivers that must be considered when  
20  
21 assessing patients' perceptions on the overall care at a health care institution in Canada.  
22

23  
24 This understanding will form the basis for a strategy of thoughtful data-driven targeted  
25  
26 interventions to improve the patient experience.  
27  
28  
29  
30  
31  
32  
33  
34  
35  
36  
37  
38  
39  
40  
41  
42  
43  
44  
45  
46  
47  
48  
49  
50  
51  
52  
53  
54  
55  
56  
57  
58  
59  
60

1  
2  
3 Figure Legends:  
4

5 Figure 1: Unadjusted and adjusted predicted percent topbox of corporate indicator “Rate  
6 your experience” by hospital department. Error bars represent 95% CI. Difference  
7  
8 between Surgery/ENT and Medicine significant ( $p=0.05$ ) in Unadjusted, however no  
9  
10 differences between departments in Adjusted  
11  
12

13  
14 Figure 2: Unadjusted and adjusted predicted percent topbox of corporate indicator  
15  
16 “Recommend this hospital” by hospital department. Error bars represent 95% CI. No  
17  
18 statistically significant difference between groups.  
19  
20

21 Figure 3: Unadjusted and adjusted predicted percent topbox of corporate indicator “Rate  
22  
23 this hospital” by hospital department. Error bars represent 95% CI. Differences between  
24  
25 Surgery/ENT and Family Medicine significant ( $p<0.05$ ) in the unadjusted model but not  
26  
27 in the adjusted model.  
28  
29

30 Figure 4: Unadjusted and adjusted predicted percent topbox of corporate indicator  
31  
32 “Overall helped” by hospital department. Error bars represent 95% CI. In the unadjusted  
33  
34 model, greater predicted measures were seen with surgery as compared to medicine and  
35  
36 family medicine, and with obstetrics/gynecology as compared with family medicine  
37  
38 ( $p<0.05$ ). The differences were no longer significant in the adjusted model.  
39  
40

41 Figure 5: Key driver analysis: relationship domain composite measures to the global  
42  
43 measure of Overall Experience, direct admission (left) and emergency admission(right).  
44  
45 Horizontal black dotted line – mean for all correlation values. Vertical red dotted line –  
46  
47 median for all composites. A- Communication doctors, B- Communication nurses, C-  
48  
49 Responsiveness staff, D-Care transition, E-Person-centred care, F-Pain management, G-  
50  
51  
52  
53  
54  
55  
56  
57  
58  
59  
60

1  
2  
3 Communication medications, H – Admission processes emergency, I – Admission  
4  
5 processes elective  
6  
7  
8  
9  
10  
11  
12  
13  
14  
15  
16  
17  
18  
19  
20  
21  
22  
23  
24  
25  
26  
27  
28  
29  
30  
31  
32  
33  
34  
35  
36  
37  
38  
39  
40  
41  
42  
43  
44  
45  
46  
47  
48  
49  
50  
51  
52  
53  
54  
55  
56  
57  
58  
59  
60

1  
2  
3 **Contributorship Statement:** We certify that all of the authors have fulfilled the  
4 following four criteria to justify authorship:  
5

- 6
- 7 • Substantial contributions to the conception or design of the work (F.D.R, S.S., A.F.); or
  - 8 the acquisition, analysis, or interpretation of data for the work (D.R., A.A.Z., T.R.); AND
  - 9
  - 10 • Drafting the work or revising it critically for important intellectual content (F.D.R.,
  - 11 D.R., S.S., T.R., A.F.); AND
  - 12
  - 13 • Final approval of the version to be published (F.D.R., D.R., A.A.Z., S.S., T. R., A. F.;
  - 14 AND
  - 15
  - 16 • Agreement to be accountable for all aspects of the work in ensuring that questions
  - 17 related to the accuracy or integrity of any part of the work are appropriately investigated
  - 18 and resolved. (F. D. R., D. R., A. A. Z., S. S. , T. R. , A. F.
  - 19
  - 20
  - 21
  - 22
  - 23
  - 24
  - 25
  - 26
  - 27
  - 28

29 **Competing Interests:** IAl authors have completed the ICMJE uniform disclosure form  
30 at [www.icmje.org/coi\\_disclosure.pdf](http://www.icmje.org/coi_disclosure.pdf) and declare: no support from any organisation for  
31 the submitted work; no financial relationships with any organisations that might have an  
32 interest in the submitted work in the previous three years; no other relationships or  
33 activities that could appear to have influenced the submitted work.  
34

35 **Funding:** None  
36

37 **Data Sharing:** There is no additional unpublished data from the study. The study data is  
38 partially de-anonymized and therefore it is kept on a secure server at the Ottawa Hospital.  
39  
40  
41  
42  
43  
44  
45  
46  
47  
48  
49  
50  
51  
52  
53  
54  
55  
56  
57  
58  
59  
60

1  
2  
3  
4  
5  
6  
7  
8  
9  
10  
11  
12  
13  
14  
15  
16  
17  
18  
19  
20  
21  
22  
23  
24  
25  
26  
27  
28  
29  
30  
31  
32  
33  
34  
35  
36  
37  
38  
39  
40  
41  
42  
43  
44  
45  
46  
47  
48  
49  
50  
51  
52  
53  
54  
55  
56  
57  
58  
59  
60

For peer review only

## References

1. Jha AK, Orav EJ, Zheng J, et al. Patients' perception of hospital care in the United States. *N Engl J Med* 2008;359(18):1921-31. doi: 10.1056/NEJMsa0804116
2. An act to amend various acts in the interest of patient-centred care. Legislative Assembly of Ontario. 1st Session ed, 2016.
3. Sacks GD, Lawson EH, Dawes AJ, et al. Relationship Between Hospital Performance on a Patient Satisfaction Survey and Surgical Quality. *JAMA Surg* 2015;150(9):858-64. doi: 10.1001/jamasurg.2015.1108
4. Anhang Price R, Elliott MN, Zaslavsky AM, et al. Examining the role of patient experience surveys in measuring health care quality. *Medical care research and review : MCRR* 2014;71(5):522-54. doi: 10.1177/1077558714541480
5. Arah OA, ten Asbroek AH, Delnoij DM, et al. Psychometric properties of the Dutch version of the Hospital-level Consumer Assessment of Health Plans Survey instrument. *Health Serv Res* 2006;41(1):284-301. doi: 10.1111/j.1475-6773.2005.00462.x
6. Krol MW, de Boer D, Rademakers JJ, et al. Overall scores as an alternative to global ratings in patient experience surveys; a comparison of four methods. *BMC Health Serv Res* 2013;13:479. doi: 10.1186/1472-6963-13-479
7. Sullivan P, Bell D. Investigation of the degree of organisational influence on patient experience scores in acute medical admission units in all acute hospitals in England using multilevel hierarchical regression modelling. *BMJ Open* 2017;7(1):e012133. doi: 10.1136/bmjopen-2016-012133

- 1  
2  
3 8. Hekkert KD, Cihangir S, Kleefstra SM, et al. Patient satisfaction revisited: a multilevel  
4  
5 approach. *Soc Sci Med* 2009;69(1):68-75. doi: 10.1016/j.socscimed.2009.04.016  
6  
7
- 8 9. Giordano LA, Elliott MN, Goldstein E, et al. Development, implementation, and  
9  
10 public reporting of the HCAHPS survey. *Medical care research and review* :  
11  
12 *MCCR* 2010;67(1):27-37. doi: 10.1177/1077558709341065  
13  
14
- 15 10. CIHI. Canadian Patient Experiences Survey — Inpatient Care Procedure Manual  
16  
17 2016 [Available from: ([https://www.cihi.ca/sites/default/files/document/cpes-ic-  
20  
21 procedure-manual-en.pdf](https://www.cihi.ca/sites/default/files/document/cpes-ic-<br/>18<br/>19 procedure-manual-en.pdf)].  
22
- 23 11. Medicare. Medicare.gov | Hospital Compare 2017 [Available from:  
24  
25 <http://www.hospitalcompare.hhs.gov>.  
26
- 27 12. CMS Quality Strategy 2016 [Available from:  
28  
29 [https://www.cms.gov/Medicare/Quality-Initiatives-Patient-Assessment-  
32  
33 Instruments/QualityInitiativesGenInfo/Downloads/CMS-Quality-Strategy.pdf](https://www.cms.gov/Medicare/Quality-Initiatives-Patient-Assessment-<br/>30<br/>31 Instruments/QualityInitiativesGenInfo/Downloads/CMS-Quality-Strategy.pdf)  
34  
35 accessed May 22, 2017.
- 36 13. Hall JA, Dornan MC. Patient sociodemographic characteristics as predictors of  
37  
38 satisfaction with medical care: a meta-analysis. *Soc Sci Med* 1990;30(7):811-8.  
39
- 40 14. Southern DA, Burnand B, Droesler SE, et al. Deriving ICD-10 Codes for Patient  
41  
42 Safety Indicators for Large-scale Surveillance Using Administrative Hospital  
43  
44 Data. *Med Care* 2017;55(3):252-60. doi: 10.1097/MLR.0000000000000649  
45  
46
- 47 15. Rodriguez HP, von Glahn T, Chang H, et al. Measuring patients' experiences with  
48  
49 individual specialist physicians and their practices. *Am J Med Qual*  
50  
51 2009;24(1):35-44. doi: 10.1177/1062860608326418  
52  
53  
54  
55  
56  
57  
58  
59



- 1  
2  
3 16. Thiels CA, Hanson KT, Yost KJ, et al. Effect of Hospital Case Mix on the Hospital  
4  
5 Consumer Assessment of Healthcare Providers and Systems Star Scores: Are All  
6  
7 Stars the Same? *Ann Surg* 2016;264(4):666-73. doi:  
8  
9 10.1097/SLA.0000000000001847  
10  
11  
12 17. Improvement IfHC. Triple aim for populations [Available from:  
13  
14 <http://www.ihl.org/Topics/TripleAim/Pages/default.aspx> accessed May 22, 2017  
15  
16 2017.  
17  
18  
19 18. CAHPS Hospital Survey [Available from: <http://www.hcahponline.org/home.aspx>  
20  
21 accessed May 22, 2017.  
22  
23  
24 19. Calculation of HCAHPS Scores: From Raw Data to Publicly Reported Results  
25  
26 [Centers for Medicare and Medicaid Services web site] [Available from:  
27  
28 <http://www.hcahponline.org/Files/Calculation> of HCAHPS Scores.pdf. ).2011.  
29  
30  
31 20. Kemp KA, Chan N, McCormack B, et al. Drivers of Inpatient Hospital Experience  
32  
33 Using the HCAHPS Survey in a Canadian Setting. *Health Serv Res*  
34  
35 2015;50(4):982-97. doi: 10.1111/1475-6773.12271  
36  
37  
38 21. Elliott MN, Lehrman WG, Goldstein E, et al. Do hospitals rank differently on  
39  
40 HCAHPS for different patient subgroups? *Medical care research and review* :  
41  
42 *MCRR* 2010;67(1):56-73. doi: 10.1177/1077558709339066  
43  
44  
45 22. Elliott MN, Lehrman WG, Beckett MK, et al. Gender differences in patients'  
46  
47 perceptions of inpatient care. *Health Serv Res* 2012;47(4):1482-501. doi:  
48  
49 10.1111/j.1475-6773.2012.01389.x  
50  
51  
52  
53  
54  
55  
56  
57  
58  
59  
60

|                              | Total<br>(n=2935) | Surgery<br>(n=1699) | Medicine<br>(n=1023) | Family<br>Medicine<br>(n=79) | Obs/Gyn<br>(n=95) | <i>p</i> |
|------------------------------|-------------------|---------------------|----------------------|------------------------------|-------------------|----------|
| <b>Physical health, n(%)</b> |                   |                     |                      |                              |                   | <0.001   |
| Excellent                    | 272 (9.3)         | 210 (12.4)          | 45 (4.4)             | 4 (5.1)                      | 11 (11.5)         |          |
| Very Good                    | 812 (27.7)        | 583 (34.3)          | 166 (16.2)           | 8 (10.1)                     | 46 (48.4)         |          |
| Good                         | 1008 (34.3)       | 612 (36.0)          | 328 (32.1)           | 37 (46.8)                    | 22 (23.2)         |          |
| Fair                         | 616 (21.0)        | 243 (14.3)          | 329 (32.2)           | 19 (24.1)                    | 14 (14.7)         |          |
| Poor                         | 227 (7.7)         | 51 (3)              | 155 (15.2)           | 11 (13.9)                    | 2 (2.1)           |          |
| <b>Mental health, n(%)</b>   |                   |                     |                      |                              |                   | <0.001   |
| Excellent                    | 705 (24.0)        | 484 (28.5)          | 180 (17.5)           | 10 (12.8)                    | 23 (29.2)         |          |
| Very Good                    | 1036 (35.3)       | 636 (37.5)          | 323 (31.5)           | 25 (32.1)                    | 42 (44.2)         |          |
| Good                         | 786 (26.8)        | 411 (24.2)          | 321 (31.3)           | 24 (30.8)                    | 20 (21.1)         |          |
| Fair                         | 335 (11.4)        | 141 (8.3)           | 160 (15.6)           | 15 (19.2)                    | 9 (9.5)           |          |
| Poor                         | 76 (2.6)          | 26 (1.5)            | 43 (4.2)             | 4 (5.1)                      | 1 (1.1)           |          |
| <b>Education, n(%)</b>       |                   |                     |                      |                              |                   | 0.289    |
| 8th Grade                    | 182 (6.4)         | 92 (5.6)            | 78 (7.8)             | 8 (10.4)                     | 2 (2.2)           |          |
| College/CEGE<br>P            | 676 (23.6)        | 417 (25.2)          | 214 (21.4)           | 12 (15.6)                    | 21 (22.8)         |          |
| Some High<br>School          | 315 (11.0)        | 178 (10.8)          | 109 (10.9)           | 12 (15.6)                    | 10 (10.9)         |          |
| High School                  | 682 (23.9)        | 370 (22.4)          | 270 (27.0)           | 18 (23.4)                    | 16 (17.4)         |          |
| Undergraduate                | 456 (16.0)        | 265 (11.0)          | 156 (15.6)           | 15 (19.5)                    | 16 (17.4)         |          |
| Post Graduate                | 548 (19.2)        | 331 (20.0)          | 172 (17.2)           | 12 (15.6)                    | 27 (29.4)         |          |
| <b>Race, n(%)</b>            |                   |                     |                      |                              |                   | 0.223    |
| White                        | 2555 (89.7)       | 1518 (90.7)         | 896 (89.2)           | 62 (79.5)                    | 79 (84.0)         |          |
| Black                        | 53 (1.9)          | 26 (1.6)            | 26 (2.6)             | 1 (1.3)                      | 0                 |          |
| Arab                         | 43 (1.5)          | 25 (1.5)            | 13 (1.3)             | 2 (2.6)                      | 3 (3.2)           |          |
| First Nation                 | 20 (0.7)          | 13 (0.8)            | 5 (0.5)              | 1 (1.3)                      | 1 (1.1)           |          |
| Oriental                     | 69 (2.4)          | 36 (2.2)            | 30 (3.0)             | 3 (3.9)                      | 0                 |          |
| Indian                       | 54 (1.9)          | 24 (1.4)            | 22 (22.2)            | 4 (5.1)                      | 4 (4.3)           |          |
| Other                        | 55 (1.9)          | 31 (1.9)            | 12 (1.2)             | 5 (6.4)                      | 7 (7.5)           |          |
| <b>Elixclass, n(%)</b>       |                   |                     |                      |                              |                   | <0.001   |
| <0                           | 90 (3.1)          | 60 (3.5)            | 28 (2.7)             | 2 (2.5)                      | 0                 |          |
| 0                            | 1606 (54.5)       | 1123 (65.3)         | 403 (38.3)           | 42 (51.9)                    | 38 (40)           |          |
| 1 to 5                       | 693 (23.5)        | 382 (22.2)          | 245 (23.3)           | 26 (32.1)                    | 40 (42.1)         |          |
| 6 to 13                      | 370 (12.6)        | 86 (5.0)            | 269 (25.6)           | 10 (12.4)                    | 5 (5.3)           |          |
| >13                          | 189 (6.4)         | 69 (4.0)            | 107 (10.2)           | 1 (1.2)                      | 12 (12.6)         |          |
| <b>Admit, n(%)</b>           |                   |                     |                      |                              |                   | <0.001   |
| Elective                     | 1037 (35.2)       | 896 (50.1)          | 79 (7.5)             | 0                            | 62 (65.3)         |          |
| Emergent                     | 1709 (58.0)       | 720 (41.9)          | 880 (83.7)           | 80 (98.8)                    | 29 (30.5)         |          |
| Urgent                       | 202 (6.9)         | 104 (6.1)           | 93 (8.8)             | 1 (1.2)                      | 4 (4.2)           |          |

|                                   |             |             |            |           |           |        |
|-----------------------------------|-------------|-------------|------------|-----------|-----------|--------|
| <b>Age group, n(%)</b>            |             |             |            |           |           | <0.001 |
| 18-34                             | 134 (4.6)   | 90 (5.2)    | 39 (3.7)   | 2 (2.5)   | 3 (3.2)   |        |
| 35-44                             | 152 (5.2)   | 89 (5.2)    | 46 (4.4)   | 3 (3.7)   | 14 (14.7) |        |
| 45-54                             | 313 (10.6)  | 219 (12.7)  | 80 (7.6)   | 0         | 14 (14.7) |        |
| 55-64                             | 622 (21.1)  | 383 (22.3)  | 202 (19.2) | 10 (12.4) | 27 (28.4) |        |
| 65-79                             | 1136 (38.6) | 687 (39.9)  | 394 (37.5) | 25 (30.9) | 30 (31.6) |        |
| >79                               | 590 (20.0)  | 252 (14.7)  | 290 (27.6) | 41 (50.6) | 7 (7.4)   |        |
| <b>Any psi, n(%)</b>              | 321 (10.9)  | 205 (11.9)  | 96 (9.1)   | 10 (12.4) | 10 (10.5) | 0.145  |
| <b>LOS (days), median(IQR)</b>    | 4 (2, 7)    | 3 (2, 6)    | 5 (3, 8)   | 5 (3, 9)  | 3 (2, 4)  | <0.001 |
| <b>Income decile, median(IQR)</b> | 8 (5, 9)    | 8 (5, 9)    | 8 (5, 9)   | 8 (5, 9)  | 8 (6, 9)  | 0.449  |
| <b>ICU, n(%)</b>                  | 102 (3.5)   | 60 (3.5)    | 41 (3.9)   | 1 (1.2)   | 0         | 0.914  |
| <b>Married/partner n(%)</b>       | 1904 (64.6) | 1153 (67.0) | 650 (61.8) | 42 (51.9) | 59 (62.1) | 0.003  |
| <b>Sex female n(%)</b>            | 1435 (48.7) | 794 (41.2)  | 502 (47.7) | 45 (55.6) | 100       | <0.001 |
| <b>Campus A n(%)</b>              | 1308 (43.8) | 834 (48.5)  | 423 (40.2) | 51 (63.0) | 0         | <0.001 |
| <b>ED isit within 7 days n(%)</b> | 226 (7.6)   | 144 (8.4)   | 68 (6.5)   | 8 (9.9)   | 5 (5.3)   | 0.195  |
| <b>Discharge disposition n(%)</b> |             |             |            |           |           | <0.001 |
| Home                              | 1885 (63.2) | 1220 (71.1) | 548 (52.2) | 35 (43.2) | 72 (75.8) |        |
| Home-setting                      | 872 (29.2)  | 367 (21.4)  | 425 (40.5) | 37 (45.7) | 21 (22.1) |        |
| Another health facility           | 226 (7.6)   | 130 (7.6)   | 76 (7.2)   | 9 (11.1)  | 2 (2.1)   |        |

Table 1: Characteristics of patients answering patient experience survey. Abbreviations: Elixclass – Elixhauser class, psi – patient safety indicator event, LOS – length of stay, ALC – alternate level of care at discharge, ICU – intensive care unit stay

|                        | <i>Multivariable Analysis</i> | <i>p</i> | <b>LR test (<i>p</i>)</b> |
|------------------------|-------------------------------|----------|---------------------------|
| <b>Department</b>      |                               |          | 0.671                     |
| Surgery/ENT            | reference                     |          |                           |
| Medicine               | 1.08 (0.87, 1.34)             | 0.502    |                           |
| Family                 | 0.82 (0.49, 1.39)             | 0.468    |                           |
| Obs/Gyn                | 0.88 (0.54, 1.44)             | 0.620    |                           |
| <b>Physical Health</b> |                               |          | <0.001                    |
| Excellent              | reference                     |          |                           |
| Very Good              | 0.71(0.48, 1.05)              | 0.083    |                           |
| Good                   | 0.49(0.33, 0.73)              | <0.001   |                           |
| Fair                   | 0.48(0.31, 0.74)              | 0.001    |                           |
| Poor                   | 0.40(0.24, 0.67)              | <0.001   |                           |
| <b>Mental Health</b>   |                               |          | <0.001                    |
| Excellent              | reference                     |          |                           |
| Very Good              | 0.77(0.60, 1.00)              | 0.051    |                           |
| Good                   | 0.57(0.43, 0.76)              | <0.001   |                           |
| Fair                   | 0.43(0.30, 0.62)              | <0.001   |                           |
| Poor                   | 0.40(0.22, 0.73)              | 0.003    |                           |
| <b>Education</b>       |                               |          | 0.007                     |
| 8th Grade              | reference                     |          |                           |
| Some High School       | 1.02(0.64, 1.64)              | 0.924    |                           |
| High School            | 0.69(0.45, 1.04)              | 0.077    |                           |
| College/CEGEP          | 0.56(0.37, 0.86)              | 0.007    |                           |
| Undergraduate          | 0.44(0.29, 0.69)              | <0.001   |                           |
| Post Graduate          | 0.42(0.28, 0.65)              | <0.001   |                           |
| <b>Admit-Urgent</b>    | 0.86(0.72, 1.02)              | 0.075    | 0.075                     |
| <b>Sex Male</b>        | 1.22(1.02, 1.47)              | 0.030    | 0.031                     |
| <b>Race</b>            |                               |          | 0.243                     |
| White                  | reference                     |          |                           |
| Black                  | 1.45(0.73, 2.91)              | 0.289    |                           |
| Arab                   | 0.98(0.49, 1.97)              | 0.958    |                           |
| First Nation           | 0.59(0.20, 1.79)              | 0.355    |                           |
| Oriental               | 1.43(0.80, 2.54)              | 0.226    |                           |
| Indian                 | 1.18(0.63, 2.21)              | 0.611    |                           |
| Other                  | 0.53(0.29, 0.98)              | 0.043    |                           |
| <b>Elixclass</b>       |                               |          | 0.064                     |
| <0                     | reference                     |          |                           |
| 0                      | 0.56(0.31, 0.99)              | 0.045    |                           |
| 1 to 5                 | 0.72(0.40, 1.31)              | 0.282    |                           |
| 6 to 13                | 0.57(0.30, 1.05)              | 0.073    |                           |
| >13                    | 0.61(0.32, 1.20)              | 0.151    |                           |

|                                               |                  |        |       |
|-----------------------------------------------|------------------|--------|-------|
| <b>Age Group</b>                              |                  |        | 0.007 |
| 18-34                                         | reference        |        |       |
| 35-44                                         | 1.64(0.97, 2.77) | 0.066  |       |
| 45-54                                         | 1.73(1.09, 2.72) | 0.019  |       |
| 55-64                                         | 2.28(1.49, 3.51) | <0.001 |       |
| 65-79                                         | 2.07(1.37, 3.13) | 0.001  |       |
| >79                                           | 1.83(1.18, 2.84) | 0.007  |       |
| <b>Any psi</b>                                | 0.98(0.73, 1.32) | 0.879  | 0.879 |
| <b>LOS (&gt;3 days)</b>                       | 0.85(0.69, 1.04) | 0.122  | 0.122 |
| <b>Income decile<sup>1</sup></b>              | 0.95(0.83, 1.10) | 0.521  | 0.521 |
| <b>ICU</b>                                    | 1.24(0.75, 2.04) | 0.407  | 0.402 |
| <b>Married/Partner</b>                        | 0.93(0.76, 1.12) | 0.426  | 0.425 |
| <b>Emergency visit within 7 days post d/c</b> | 0.77(0.56, 1.06) | 0.107  | 0.110 |
| <b>Discharge</b>                              |                  |        | 0.116 |
| Home                                          | reference        |        |       |
| Home setting                                  | 0.91(0.74, 1.14) | 0.423  |       |
| Another facility                              | 0.69(0.48, 0.98) | 0.037  |       |
| <b>Campus<sup>2</sup></b>                     |                  | 0.332  |       |

Table 2: Analysis of covariates associated with topbox designation of the corporate measure of “Rate experience”. 1 log transformed. 2 Tested as random effect in mixed effects model. Abbreviations: Elixclass – Elixhauser class, psi – patient safety indicator event, LOS – length of stay, ALC – alternate level of care at discharge, ICU – intensive care unit stay, LR – likelihood ratio

|                        | <b>Multivariable Analysis</b> | <b><i>p</i></b> | <b>LR test (<i>p</i>)</b> |
|------------------------|-------------------------------|-----------------|---------------------------|
| <b>Department</b>      |                               |                 | 0.908                     |
| Surgery/ENT            | reference                     |                 |                           |
| Medicine               | 1.06(0.84, 1.34)              | 0.620           |                           |
| Family                 | 0.89(0.51, 1.53)              | 0.669           |                           |
| Obs/Gyn                | 1.03(0.62, 1.72)              | 0.913           |                           |
| <b>Physical Health</b> |                               |                 | 0.018                     |
| Excellent              | reference                     |                 |                           |
| Very Good              | 0.74(0.49, 1.12)              | 0.152           |                           |
| Good                   | 0.54(0.36, 0.81)              | 0.003           |                           |
| Fair                   | 0.56(0.35, 0.88)              | 0.012           |                           |
| Poor                   | 0.557(0.323, 0.959)           | 0.035           |                           |
| <b>Mental Health</b>   |                               |                 | <0.001                    |
| Excellent              | reference                     |                 |                           |
| Very Good              | 0.90(0.69, 1.18)              | 0.435           |                           |
| Good                   | 0.63(0.47, 0.85)              | 0.002           |                           |
| Fair                   | 0.56(0.39, 0.81)              | 0.002           |                           |
| Poor                   | 0.39(0.21, 0.71)              | 0.001           |                           |
| <b>Education</b>       |                               |                 | <0.001                    |
| 8th Grade              | reference                     |                 |                           |
| Some High School       | 1.07(0.67, 1.73)              | 0.768           |                           |
| High School            | 0.94(0.62, 1.45)              | 0.793           |                           |
| College/CEGEP          | 0.67(0.44, 1.03)              | 0.069           |                           |
| Undergraduate          | 0.57(0.36, 0.89)              | 0.014           |                           |
| Post Graduate          | 0.63(0.41, 0.99)              | 0.045           |                           |
| <b>Race</b>            |                               |                 | <0.001                    |
| White                  | reference                     |                 |                           |
| Black                  | 5.63(1.72, 18.45)             | 0.004           |                           |
| Arab                   | 1.56(0.70, 3.49)              | 0.273           |                           |
| First Nation           | 0.38(0.13, 1.11)              | 0.078           |                           |
| Oriental               | 2.09(1.07, 4.11)              | 0.032           |                           |
| Indian                 | 1.64(0.81, 3.33)              | 0.168           |                           |
| Other                  | 0.51(0.28, 0.93)              | 0.028           |                           |
| <b>Elixclass</b>       |                               |                 | 0.197                     |
| <0                     | reference                     |                 |                           |
| 0                      | 0.48(0.26, 0.93)              | 0.030           |                           |
| 1 to 5                 | 0.54(0.27, 1.05)              | 0.068           |                           |
| 6 to 13                | 0.56(0.28, 1.13)              | 0.103           |                           |
| >13                    | 0.51(0.25, 1.07)              | 0.074           |                           |
| <b>Admit Urgent</b>    | 0.98(0.82, 1.17)              | 0.843           | 0.843                     |

|                                               |                  |        |        |
|-----------------------------------------------|------------------|--------|--------|
| <b>Age Group</b>                              |                  |        | 0.048  |
| 18-34                                         | reference        |        |        |
| 35-44                                         | 1.17(0.67, 2.06) | 0.566  |        |
| 45-54                                         | 1.82(1.11, 3.00) | 0.019  |        |
| 55-64                                         | 1.85(1.16, 2.93) | 0.009  |        |
| 65-79                                         | 1.58(1.02, 2.46) | 0.042  |        |
| >79                                           | 1.37(0.86, 2.19) | 0.185  |        |
| <b>Any psi</b>                                | 1.09(0.79, 1.49) | 0.600  | 0.092  |
| <b>LOS &gt; 3 days</b>                        | 0.88(0.71, 1.09) | 0.247  | 0.248  |
| <b>Income decile<sup>1</sup></b>              | 1.01(0.87, 1.17) | 0.908  | 0.908  |
| <b>ICU</b>                                    | 1.62(0.92, 2.87) | 0.098  | 0.086  |
| <b>Married/Partner</b>                        | 0.80(0.65, 0.98) | 0.031  | 0.030  |
| <b>Sex male</b>                               | 1.41(1.16, 1.70) | <0.001 | <0.001 |
| <b>Emergency visit within 7 days post d/c</b> | 0.75(0.54, 1.04) | 0.088  | 0.081  |
| <b>Discharge</b>                              |                  |        | 0.037  |
| Home                                          | reference        |        |        |
| Home setting                                  | 0.76(0.61, 0.96) | 0.020  |        |
| Another facility                              | 0.71(0.49, 1.03) | 0.069  |        |
| <b>Campus<sup>2</sup></b>                     |                  | 1.000  |        |

Table 3: Analysis of covariates associated with topbox measure of “Recommend this hospital”. 1 log transformed. 2 Tested as random effect in mixed effects model. Abbreviations: Elixclass – Elixhauser class, psi – patient safety indicator event, LOS – length of stay, ALC – alternate level of care at discharge, ICU – intensive care unit stay

|                        | <b>Multivariable Analysis</b> | <b><i>p</i></b> | <b>LR test (<i>p</i>)</b> |
|------------------------|-------------------------------|-----------------|---------------------------|
| <b>Department</b>      |                               |                 | 0.496                     |
| Surgery/ENT            | reference                     |                 |                           |
| Medicine               | 0.96(0.78, 1.18)              | 0.676           |                           |
| Family                 | 0.71(0.43, 1.19)              | 0.197           |                           |
| Obs/Gyn                | 1.20(0.75, 1.93)              | 0.451           |                           |
| <b>Physical Health</b> |                               |                 | <0.001                    |
| Excellent              | reference                     |                 |                           |
| Very Good              | 0.70(0.50, 0.99)              | 0.041           |                           |
| Good                   | 0.49(0.34, 0.69)              | <0.001          |                           |
| Fair                   | 0.61(0.42, 0.91)              | 0.014           |                           |
| Poor                   | 0.67(0.41, 1.09)              | 0.109           |                           |
| <b>Mental Health</b>   |                               |                 | <0.001                    |
| Excellent              | reference                     |                 |                           |
| Very Good              | 0.74(0.59, 0.94)              | 0.013           |                           |
| Good                   | 0.58(0.45, 0.76)              | <0.001          |                           |
| Fair                   | 0.52(0.37, 0.73)              | <0.001          |                           |
| Poor                   | 0.51(0.28, 0.91)              | 0.024           |                           |
| <b>Education</b>       |                               |                 | <0.001                    |
| 8th Grade              | reference                     |                 |                           |
| Some High School       | 1.16(0.75, 1.77)              | 0.507           |                           |
| High School            | 0.90(0.62, 1.32)              | 0.599           |                           |
| College/CEGEP          | 0.61(0.42, 0.90)              | 0.013           |                           |
| Undergraduate          | 0.47(0.32, 0.72)              | <0.001          |                           |
| Post Graduate          | 0.49(0.32, 0.71)              | <0.001          |                           |
| <b>Race</b>            |                               |                 | 0.399                     |
| White                  | reference                     |                 |                           |
| Black                  | 1.70(0.88, 3.29)              | 0.114           |                           |
| Arab                   | 0.95(0.50, 1.82)              | 0.879           |                           |
| First Nation           | 0.70(0.24, 2.01)              | 0.503           |                           |
| Oriental               | 1.26(0.74, 2.14)              | 0.403           |                           |
| Indian                 | 1.23(0.67, 2.26)              | 0.501           |                           |
| Other                  | 0.66(0.36, 1.19)              | 0.166           |                           |
| <b>Admit Urgent</b>    | 0.87(0.74, 1.02)              |                 | 0.093                     |
| <b>Sex Male</b>        | 1.31(1.10, 1.55)              | 0.002           | 0.002                     |
| <b>Elixclass</b>       |                               |                 | 0.073                     |
| <0                     | reference                     |                 |                           |
| 0                      | 0.56(0.34, 0.93)              | 0.025           |                           |
| 1 to 5                 | 0.69(0.40, 1.17)              | 0.169           |                           |
| 6 to 13                | 0.66(0.38, 1.16)              | 0.148           |                           |
| >13                    | 0.59(0.32, 1.07)              | 0.083           |                           |



|                                               |                  |        |       |
|-----------------------------------------------|------------------|--------|-------|
| <b>Age Group</b>                              |                  |        | 0.001 |
| 18-34                                         | reference        |        |       |
| 35-44                                         | 1.47(0.89, 2.44) | 0.136  |       |
| 45-54                                         | 2.03(1.30, 3.17) | 0.002  |       |
| 55-64                                         | 2.35(1.54, 3.58) | <0.001 |       |
| 65-79                                         | 2.03(1.35, 3.04) | 0.001  |       |
| >79                                           | 1.82(1.19, 2.80) | 0.006  |       |
| <b>Any psi</b>                                | 0.92(0.69, 1.22) | 0.544  | 0.544 |
| <b>LOS &gt; 3 days</b>                        | 0.96(0.79, 1.16) | 0.668  | 0.668 |
| <b>Income decile<sup>1</sup></b>              | 1.06(0.93, 1.21) | 0.395  | 0.395 |
| <b>ICU</b>                                    | 1.93(1.17, 3.19) | 0.010  | 0.008 |
| <b>Married/Partner</b>                        | 0.89(0.74, 1.06) | 0.200  | 0.200 |
| <b>Emergency visit within 7 days post d/c</b> | 0.76(0.56, 1.04) | 0.083  | 0.084 |
| <b>Discharge</b>                              |                  |        | 0.016 |
| Home                                          | reference        |        |       |
| Home setting                                  | 0.81(0.66, 1.00) | 0.052  |       |
| Another facility                              | 0.70(0.50, 0.99) | 0.046  |       |
| <b>Campus<sup>2</sup></b>                     |                  | 0.008  |       |

Table 4: Analysis of covariates associated with topbox measure of “Rate this hospital”. 1 log transformed.  
 2 Tested as random effect in mixed effects model. Abbreviations: Elixclass – Elixhauser class, psi – patient safety indicator event, LOS – length of stay, ALC – alternate level of care at discharge, ICU – intensive care unit stay

|                        | <b>Multivariable Analysis</b> | <b><i>p</i></b> | <b>LR test (<i>p</i>)</b> |
|------------------------|-------------------------------|-----------------|---------------------------|
| <b>Department</b>      |                               |                 | 0.167                     |
| Surgery/ENT            | reference                     |                 |                           |
| Medicine               | 0.83(0.66, 1.04)              | 0.113           |                           |
| Family                 | 0.60(0.36, 1.01)              | 0.047           |                           |
| Obs/Gyn                | 0.85(0.49, 1.47)              | 0.558           |                           |
| <b>Physical Health</b> |                               |                 | <0.001                    |
| Excellent              | reference                     |                 |                           |
| Very Good              | 0.89(0.58, 1.37)              | 0.601           |                           |
| Good                   | 0.59(0.38, 0.90)              | 0.014           |                           |
| Fair                   | 0.57(0.36, 0.91)              | 0.019           |                           |
| Poor                   | 0.39(0.23, 0.68)              | 0.001           |                           |
| <b>Mental Health</b>   |                               |                 | <0.001                    |
| Excellent              | reference                     |                 |                           |
| Very Good              | 0.70(0.53, 0.94)              | 0.019           |                           |
| Good                   | 0.52(0.39, 0.71)              | <0.001          |                           |
| Fair                   | 0.44(0.30, 0.64)              | <0.001          |                           |
| Poor                   | 0.44(0.24, 0.81)              | 0.008           |                           |
| <b>Education</b>       |                               |                 | 0.126                     |
| 8th Grade              | reference                     |                 |                           |
| Some High School       | 1.03(0.64, 1.63)              | 0.914           |                           |
| High School            | 0.87(0.57, 1.31)              | 0.500           |                           |
| College/CEGEP          | 0.81(0.53, 1.23)              | 0.319           |                           |
| Undergraduate          | 0.63(0.41, 0.98)              | 0.039           |                           |
| Post Graduate          | 0.79(0.51, 1.22)              | 0.285           |                           |
| <b>Race</b>            |                               |                 | 0.505                     |
| White                  | reference                     |                 |                           |
| Black                  | 1.81(0.81, 4.01)              | 0.146           |                           |
| Arab                   | 0.83(0.41, 1.69)              | 0.612           |                           |
| First Nation           | 0.94(0.28, 3.12)              | 0.920           |                           |
| Oriental               | 1.17(0.65, 2.12)              | 0.606           |                           |
| Indian                 | 1.04(0.55, 2.00)              | 0.895           |                           |
| Other                  | 0.61(0.33, 1.14)              | 0.122           |                           |
| <b>Admit Urgent</b>    | 0.86(0.72, 1.03)              | 0.108           | 0.109                     |
| <b>Sex Male</b>        | 1.01(0.83, 1.23)              | 0.906           | 0.906                     |
| <b>Elixclass</b>       |                               |                 | 0.079                     |
| <0                     | reference                     |                 |                           |
| 0                      | 0.70(0.39, 1.28)              | 0.252           |                           |
| 1 to 5                 | 0.98(0.52, 1.82)              | 0.938           |                           |
| 6 to 13                | 0.71(0.37, 1.37)              | 0.309           |                           |
| >13                    | 0.81(0.40, 1.62)              | 0.547           |                           |

|                                               |                  |       |       |
|-----------------------------------------------|------------------|-------|-------|
| <b>Age Group</b>                              |                  |       | 0.042 |
| 18-34                                         | reference        |       |       |
| 35-44                                         | 1.10(0.63, 1.91) | 0.739 |       |
| 45-54                                         | 1.82(1.10, 3.00) | 0.019 |       |
| 55-64                                         | 1.73(1.10, 2.75) | 0.018 |       |
| 65-79                                         | 1.56(1.01, 2.42) | 0.047 |       |
| >79                                           | 1.42(0.89, 2.26) | 0.254 |       |
| <b>Any psi</b>                                | 1.12(0.81, 1.54) | 0.492 | 0.490 |
| <b>LOS &gt; 3 days</b>                        | 0.91(0.73, 1.13) | 0.378 | 0.379 |
| <b>Income decile<sup>1</sup></b>              | 1.01(0.87, 1.17) | 0.912 | 0.912 |
| <b>ICU</b>                                    | 1.32(0.76, 2.27) | 0.325 | 0.316 |
| <b>Married/Partner</b>                        | 0.92(0.75, 1.13) | 0.418 | 0.417 |
| <b>Emergency visit within 7 days post d/c</b> | 0.76(0.54, 1.06) | 0.102 | 0.107 |
| <b>Discharge</b>                              |                  |       | 0.088 |
| Home                                          | reference        |       |       |
| Home setting                                  | 0.84(0.67, 1.05) | 0.128 |       |
| Another facility                              | 0.68(0.47, 0.99) | 0.043 |       |
| <b>Campus<sup>2</sup></b>                     |                  | 0.999 |       |

Table 5: Analysis of covariates associated with topbox measure of “Overall helped”. 1 log transformed. 2 Tested as random effect in mixed effects model. Abbreviations: Elixclass – Elixhauser class, psi – patient safety indicator event, LOS – length of stay, ALC – alternate level of care at discharge, ICU – intensive care unit stay

1  
2  
3  
4  
5  
6  
7  
8  
9  
10  
11  
12  
13  
14  
15  
16  
17  
18  
19  
20  
21  
22  
23  
24  
25  
26  
27  
28  
29  
30  
31  
32  
33  
34  
35  
36  
37  
38  
39  
40  
41  
42  
43  
44  
45  
46  
47  
48  
49  
50  
51  
52  
53  
54  
55  
56  
57  
58  
59  
60

For peer review only

### Rate Experience

Unadjusted

Adjusted

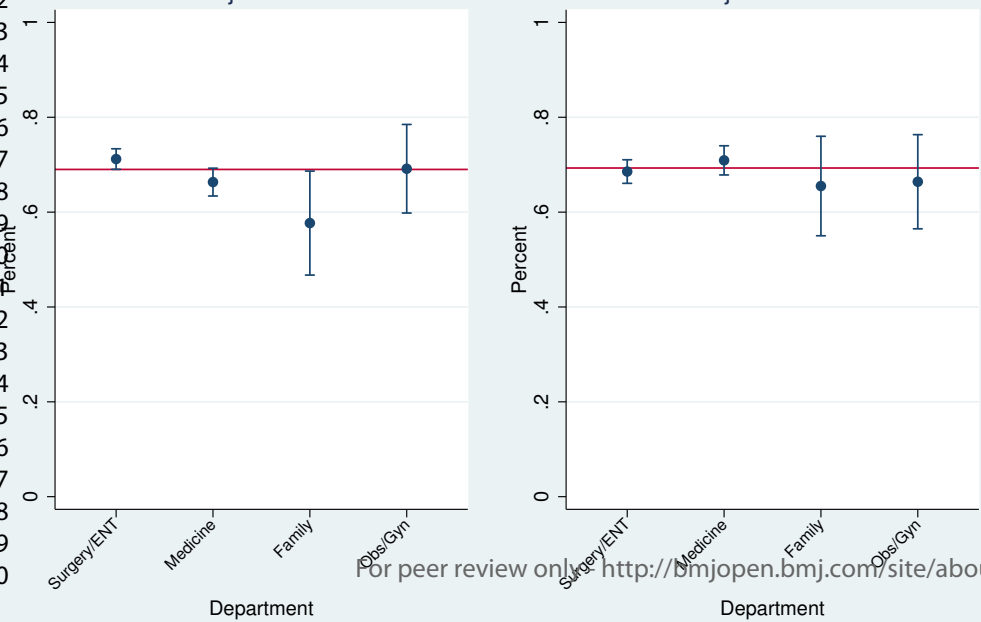

1  
2  
3  
4  
5  
6  
7  
8  
9  
10  
11  
12  
13  
14  
15  
16  
17  
18  
19  
20  
21  
22  
23  
24  
25  
26  
27  
28  
29  
30  
31  
32  
33  
34  
35  
36  
37  
38  
39  
40  
41  
42  
43  
44  
45  
46  
47  
48  
49  
50  
51  
52  
53  
54  
55  
56  
57  
58  
59  
60

For peer review only

### Recommend Hospital

Unadjusted

Adjusted

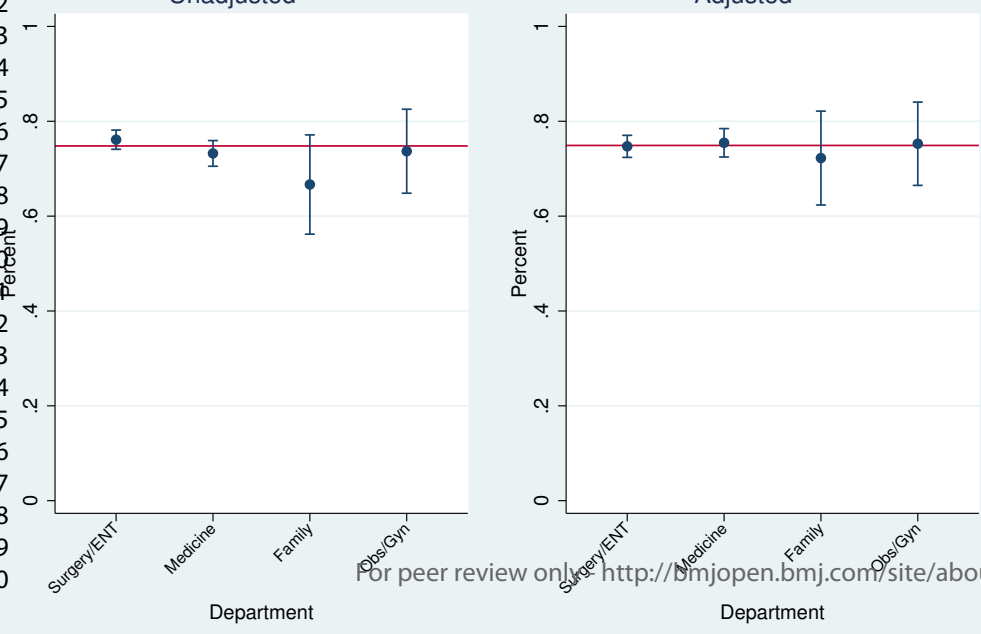

1  
2  
3  
4  
5  
6  
7  
8  
9  
10  
11  
12  
13  
14  
15  
16  
17  
18  
19  
20  
21  
22  
23  
24  
25  
26  
27  
28  
29  
30  
31  
32  
33  
34  
35  
36  
37  
38  
39  
40  
41  
42  
43  
44  
45  
46  
47  
48  
49  
50  
51  
52  
53  
54  
55  
56  
57  
58  
59  
60

For peer review only

Unadjusted

Adjusted

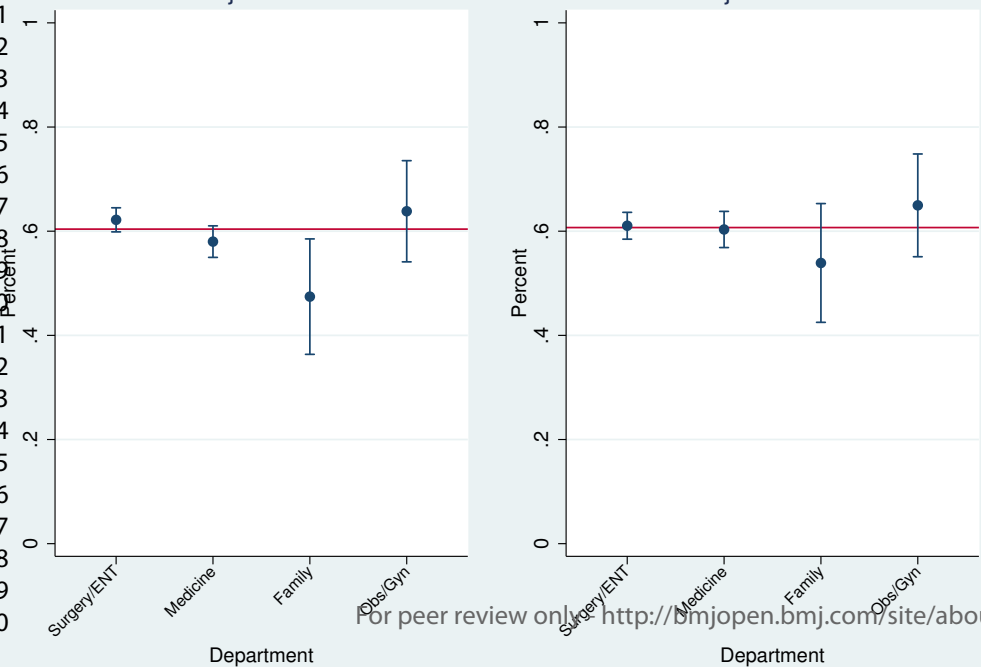

1  
2  
3  
4  
5  
6  
7  
8  
9  
10  
11  
12  
13  
14  
15  
16  
17  
18  
19  
20  
21  
22  
23  
24  
25  
26  
27  
28  
29  
30  
31  
32  
33  
34  
35  
36  
37  
38  
39  
40  
41  
42  
43  
44  
45  
46  
47  
48  
49  
50  
51  
52  
53  
54  
55  
56  
57  
58  
59  
60

For peer review only

Unadjusted

Adjusted

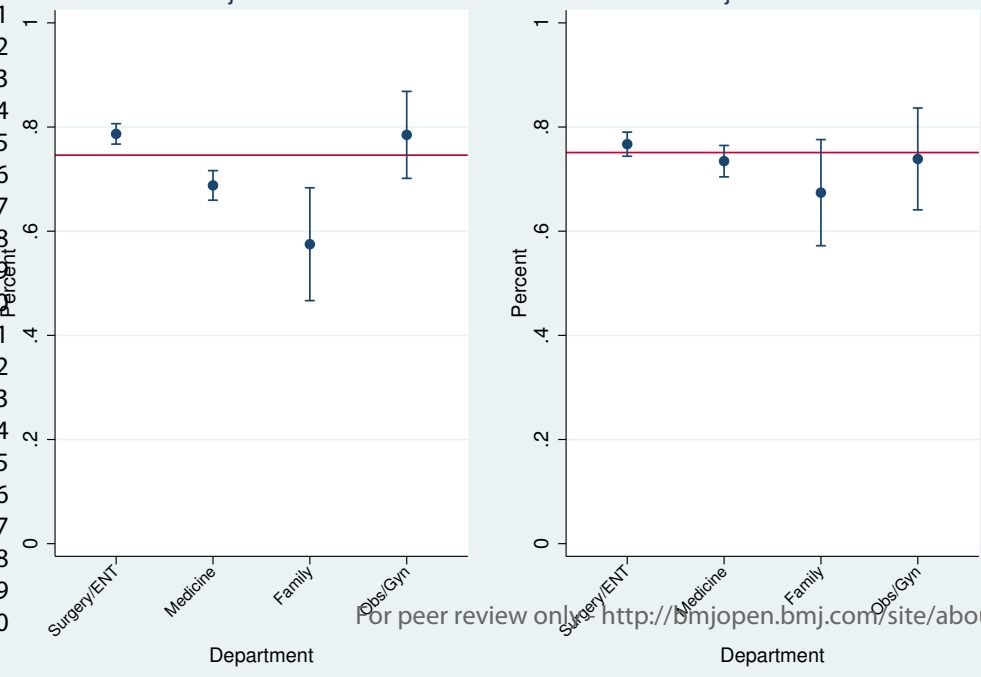

1  
2  
3  
4  
5  
6  
7  
8  
9  
10  
11  
12  
13  
14  
15  
16  
17  
18  
19  
20  
21  
22  
23  
24  
25  
26  
27  
28  
29  
30  
31  
32  
33  
34  
35  
36  
37  
38  
39  
40  
41  
42  
43  
44  
45  
46  
47  
48  
49  
50  
51  
52  
53  
54  
55  
56  
57  
58  
59  
60

For peer review only

### Rate Experience Key Driver Analysis

#### Direct Admission

#### Emerg Admission

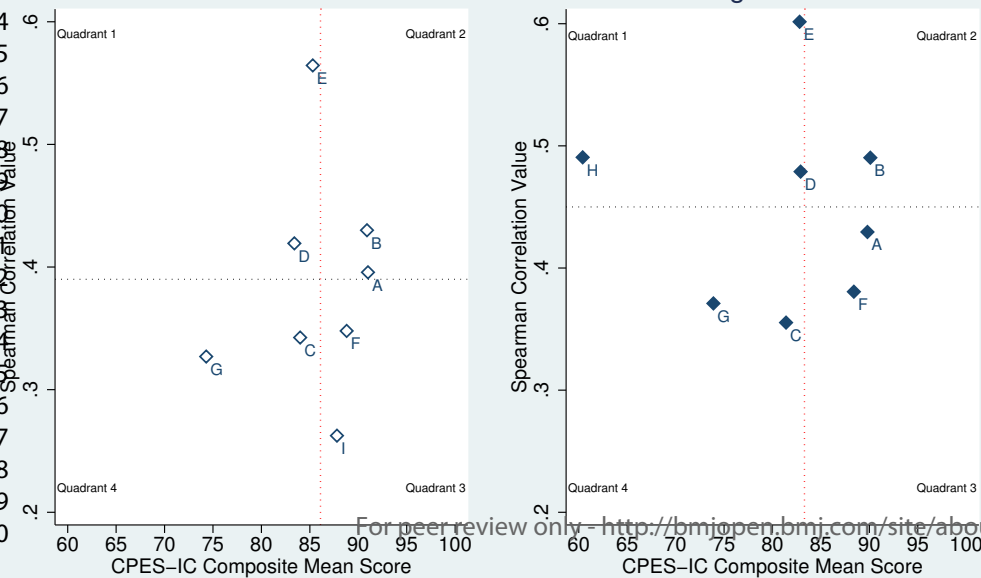



# Canadian Patient Experiences Survey—Inpatient Care

## Survey Instructions

- ◆ You should fill out this questionnaire only if you were the patient named on the envelope. You may need to get help from a family member or friend to answer the questions. That's okay.
- ◆ Answer all the questions by checking the box to the left of your answer.
- ◆ Your response to this survey is voluntary but will provide us with important information.
- ◆ You are sometimes told to skip over some questions in this survey. When this happens, you will see an arrow with a note that tells you what question to answer next, like this:

- Yes
- No → If No, go to Question 1

Placeholder for jurisdiction comments.

***Please answer the questions about your recent stay at the hospital named on the cover letter. Do not include any other hospital stays in your answers.***

### **YOUR CARE FROM NURSES**

**1. During this hospital stay, how often did nurses treat you with courtesy and respect?**

- Never
- Sometimes
- Usually
- Always

**2. During this hospital stay, how often did nurses listen carefully to you?**

- Never
- Sometimes
- Usually
- Always

**3. During this hospital stay, how often did nurses explain things in a way you could understand?**

- Never
- Sometimes
- Usually
- Always

**4. During this hospital stay, after you pressed the call button, how often did you get help as soon as you wanted it?**

- Never
- Sometimes
- Usually
- Always
- I never pressed the call button

---

**YOUR CARE FROM DOCTORS**

---

5. During this hospital stay, how often did doctors treat you with courtesy and respect?

- Never  
 Sometimes  
 Usually  
 Always

6. During this hospital stay, how often did doctors listen carefully to you?

- Never  
 Sometimes  
 Usually  
 Always

7. During this hospital stay, how often did doctors explain things in a way you could understand?

- Never  
 Sometimes  
 Usually  
 Always

---

**THE HOSPITAL ENVIRONMENT**

---

8. During this hospital stay, how often were your room and bathroom kept clean?

- Never  
 Sometimes  
 Usually  
 Always

9. During this hospital stay, how often was the area around your room quiet at night?

- Never  
 Sometimes  
 Usually  
 Always

---

**YOUR EXPERIENCES IN THIS HOSPITAL**

---

10. During this hospital stay, did you need help from nurses or other hospital staff in getting to the bathroom or in using a bedpan?

- Yes  
 No → If No, go to Question 12

11. How often did you get help in getting to the bathroom or in using a bedpan as soon as you wanted?

- Never  
 Sometimes  
 Usually  
 Always

12. During this hospital stay, did you need medicine for pain?

- Yes  
 No → If No, go to Question 15

13. During this hospital stay, how often was your pain well controlled?

- Never  
 Sometimes  
 Usually  
 Always

14. During this hospital stay, how often did the hospital staff do everything they could to help you with your pain?

- Never  
 Sometimes  
 Usually  
 Always

1  
2  
3  
4  
5  
6  
7  
8  
9  
10  
11  
12  
13  
14  
15  
16  
17  
18  
19  
20  
21  
22  
23  
24  
25  
26  
27  
28  
29  
30  
31  
32  
33  
34  
35  
36  
37  
38  
39  
40  
41  
42  
43  
44  
45  
46  
47  
48  
49  
50  
51  
52  
53  
54  
55  
56  
57  
58  
59  
60

**15. During this hospital stay, were you given any medicine that you had not taken before?**

Yes

No → If No, go to Question 18

**16. Before giving you any new medicine, how often did hospital staff tell you what the medicine was for?**

Never

Sometimes

Usually

Always

**17. Before giving you any new medicine, how often did hospital staff describe possible side effects in a way you could understand?**

Never

Sometimes

Usually

Always

#### **WHEN YOU LEFT THE HOSPITAL**

---

**18. After you left the hospital, did you go directly to your own home, to someone else's home or to another health facility?**

Own home

Someone else's home

Another health facility → **If Another health facility, go to Question 21**

**19. During this hospital stay, did doctors, nurses or other hospital staff talk with you about whether you would have the help you needed when you left the hospital?**

Yes

No

**20. During this hospital stay, did you get information in writing about what symptoms or health problems to look out for after you left the hospital?**

Yes

No

#### **OVERALL RATING OF HOSPITAL**

---

*Please answer the following questions about your stay at the hospital named on the cover letter. Do not include any other hospital stays in your answers.*

**21. Using any number from 0 to 10, where 0 is the worst hospital possible and 10 is the best hospital possible, what number would you use to rate this hospital during your stay?**

0 Worst hospital possible

1

2

3

4

5

6

7

8

9

10 Best hospital possible

1  
2  
3  
4  
5  
6  
7  
8  
9  
10  
11  
12  
13  
14  
15  
16  
17  
18  
19  
20  
21  
22  
23  
24  
25  
26  
27  
28  
29  
30  
31  
32  
33  
34  
35  
36  
37  
38  
39  
40  
41  
42  
43  
44  
45  
46  
47  
48  
49  
50  
51  
52  
53  
54  
55  
56  
57  
58  
59  
60

**22. Would you recommend this hospital to your friends and family?**

- Definitely no  
 Probably no  
 Probably yes  
 Definitely yes

*In this next section, we ask several more questions about your stay at the hospital.*

### **YOUR ARRIVAL AT THE HOSPITAL**

**23. When you arrived at the hospital, did you go to the emergency department?**

- Yes → If Yes, go to Question 26  
 No ↓ If No, please continue below

**24. Before coming to the hospital, did you have enough information about what was going to happen during the admission process?**

- Not at all  
 Partly  
 Quite a bit  
 Completely

**25. Was your admission into the hospital organized?**

- Not at all  
 Partly  
 Quite a bit  
 Completely

**Go to Question 30**

**Answer questions 26 to 29 only if you were admitted through the emergency department.**

**26. When you were in the emergency department, did you get enough information about your condition and treatment?**

- Not at all  
 Partly  
 Quite a bit  
 Completely

**27. Were you given enough information about what was going to happen during your admission to the hospital?**

- Not at all  
 Partly  
 Quite a bit  
 Completely

**28. After you knew that you needed to be admitted to a hospital bed, did you have to wait too long before getting there?**

- Yes  
 No

**29. Was your transfer from the emergency department into a hospital bed organized?**

- Not at all  
 Partly  
 Quite a bit  
 Completely

**Continue with Question 30**

## **DURING YOUR HOSPITAL STAY**

---

**30. Do you feel that there was good communication about your care between doctors, nurses and other hospital staff?**

- Never
- Sometimes
- Usually
- Always

**31. How often did doctors, nurses and other hospital staff seem informed and up-to-date about your hospital care?**

- Never
- Sometimes
- Usually
- Always

**32. How often were tests and procedures done when you were told they would be done?**

- Never
- Sometimes
- Usually
- Always
- I did not have any tests or procedures

**33. During this hospital stay, did you get all the information you needed about your condition and treatment?**

- Never
- Sometimes
- Usually
- Always

**34. Did you get the support you needed to help you with any anxieties, fears or worries you had during this hospital stay?**

- Never
- Sometimes
- Usually
- Always
- Not applicable

**35. Were you involved as much as you wanted to be in decisions about your care and treatment?**

- Never
- Sometimes
- Usually
- Always

**36. Were your family or friends involved as much as you wanted in decisions about your care and treatment?**

- Never
- Sometimes
- Usually
- Always
- I did not want them to be involved
- I did not have family or friends to be involved

## **LEAVING THE HOSPITAL**

---

**37. Before you left the hospital, did you have a clear understanding about all of your prescribed medications, including those you were taking before your hospital stay?**

- Not at all
- Partly
- Quite a bit
- Completely
- Not applicable

1  
2  
3  
4  
5  
6  
7  
8  
9  
10  
11  
12  
13

**38. Did you receive enough information from hospital staff about what to do if you were worried about your condition or treatment after you left the hospital?**

- Not at all  
 Partly  
 Quite a bit  
 Completely

14  
15  
16  
17  
18

**39. When you left the hospital, did you have a better understanding of your condition than when you entered?**

- Not at all  
 Partly  
 Quite a bit  
 Completely

19  
20  
21  
22  
23  
24  
25

### **YOUR OVERALL RATINGS**

26  
27  
28  
29  
30  
31  
32

**40. Overall, do you feel you were helped by your hospital stay? Please answer on a scale where 0 is “not helped at all” and 10 is “helped completely.”**

33  
34

**Overall . . . (Please circle a number)**

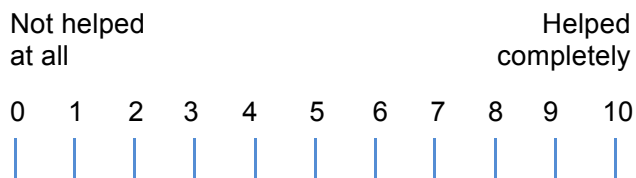

43  
44

**41. Overall . . . (Please circle a number)**

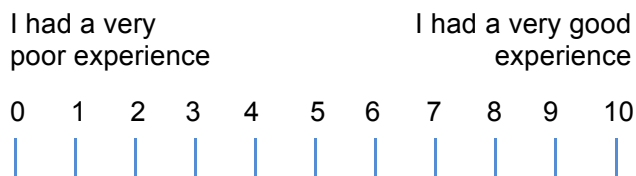

53  
54  
55  
56  
57  
58  
59  
60

### **ABOUT YOU**

**42. In general, how would you rate your overall physical health?**

- Excellent  
 Very good  
 Good  
 Fair  
 Poor

**43. In general, how would you rate your overall mental or emotional health?**

- Excellent  
 Very good  
 Good  
 Fair  
 Poor

**44. What is the highest grade or level of school that you have completed?**

- 8th grade or less  
 Some high school, but did not graduate  
 High school or high school equivalency certificate  
 College, CEGEP or other non-university certificate or diploma  
 Undergraduate degree or some university  
 Post-graduate degree or professional designation

**45. What is your gender?**

- Male  
 Female  
 Other

**46. What is your year of birth?**

(Please write in; for example, "1934.")

\_\_\_\_\_

**47. Was your most recent stay at this hospital for a childbirth experience?**

Yes

No

**48. The following question will help us to better understand the communities that we serve. Do you consider yourself to be . . .**

**(Check all that apply)**

White

Chinese

First Nation, Métis, Inuk or mixed (others may say Aboriginal or Indigenous)

South Asian (East Indian, Pakistani, Sri Lankan, etc.)

Black

Filipino

Latin American

Southeast Asian (Vietnamese, Cambodian, Malaysian, Laotian, etc.)

Arab

West Asian (Iranian, Afghan, etc.)

Korean

Japanese

Other

**49. Is there anything else you would like to share about your hospital stay?**

Questions 1 to 22 and 43 are adapted from the HCAHPS (Hospital Consumer Assessment of Healthcare Providers and Systems) questionnaire.

Questions 23 to 49 (excluding question 43) were adapted and/or developed by the Canadian Institute for Health Information in consultation with an interjurisdictional committee of experts.

**Reporting Checklist for Submitted Manuscript: Impact of patient characteristics on the Canadian Patient Experiences Survey – Inpatient Care survey- analysis from an academic tertiary care centre**

**Rubens FD et al.**

**BMJ Open 2018**

Based upon: Proposed Reporting Guidelines: Burns KE et al 2008. A guide for the design and conduct of self-administered surveys for clinicians. CMAJ 179;245-252

| <b>Paper Section</b> | <b>Question</b>                                                                              | <b>Identified in Text</b>                                         |
|----------------------|----------------------------------------------------------------------------------------------|-------------------------------------------------------------------|
| Abstract             | Is the objective clearly stated?                                                             | Page 2                                                            |
|                      | Is the design of the study stated?                                                           | Page 2                                                            |
|                      | Is the study setting well-described?                                                         | Page 2                                                            |
|                      | Is the survey population described?                                                          | Page 2                                                            |
|                      | Is the response rate reported?                                                               | No – not available                                                |
|                      | Are the outcome measures identified?                                                         | Page 2                                                            |
|                      | Are the main results clearly reported?                                                       | Page 2                                                            |
|                      | Are the conclusions appropriate?                                                             | Page 2                                                            |
| Introduction         | Is the problem clearly stated?                                                               | Pages 5-7                                                         |
|                      | Is the pertinent literature cited and critically appraised?                                  | Pages 5-7                                                         |
|                      | Is the relevance of the research question explained?                                         | Pages 5-7                                                         |
|                      | Is the objective clearly stated?                                                             | Pages 7-8                                                         |
| Methods              | Is the study design appropriate to the objective?                                            | Pages 8-9                                                         |
|                      | Is the setting clearly described?                                                            | Page 8                                                            |
|                      | Are the methods described clearly enough to permit other researchers to duplicate the study? | Pages 8-10                                                        |
|                      | Is the survey sample likely to be representative of the population?                          | Page 8                                                            |
|                      | Is the questionnaire described adequately?                                                   | Appendix                                                          |
|                      | Have the validity and reliability of the questionnaire been established?                     | Not applicable – survey developed elsewhere and validated by CIHI |
|                      | Was the questionnaire administered in a satisfactory way?                                    | Page 8                                                            |
|                      | Are the statistical methods used appropriately?                                              | Pages 9-10                                                        |
| Results              | Do the results address the objective?                                                        | Pages 10-12                                                       |
|                      | Are all the respondents accounted for?                                                       | Pages 10-12                                                       |
|                      | Are the results clearly and logically                                                        | Pages 10-12,                                                      |



|            |                                                             |                     |
|------------|-------------------------------------------------------------|---------------------|
|            | presented?                                                  | Figures 1-5, Tables |
|            | Are the tables and figures appropriate?                     | Figures 1-5, Tables |
|            | Are the numbers consistent in the text and the tables?      | Pages 10-12         |
| Discussion | Are the results succinctly summarized?                      | Page 12             |
|            | Are the implications of the results stated?                 | Pages 14-15         |
|            | Are other interpretations considered and refuted?           | Pages 15-16         |
|            | Are the limitations of the study and its results explained? | Pages 15-16         |
|            | Are appropriate conclusions drawn?                          | Page 16             |

# BMJ Open

## Impact of patient characteristics on the Canadian Patient Experiences Survey – Inpatient Care survey- analysis from an academic tertiary care centre

|                                 |                                                                                                                                                                                                                                                                                                                              |
|---------------------------------|------------------------------------------------------------------------------------------------------------------------------------------------------------------------------------------------------------------------------------------------------------------------------------------------------------------------------|
| Journal:                        | <i>BMJ Open</i>                                                                                                                                                                                                                                                                                                              |
| Manuscript ID                   | bmjopen-2018-021575.R1                                                                                                                                                                                                                                                                                                       |
| Article Type:                   | Research                                                                                                                                                                                                                                                                                                                     |
| Date Submitted by the Author:   | 03-May-2018                                                                                                                                                                                                                                                                                                                  |
| Complete List of Authors:       | Rubens, F; University of Ottawa Heart Institute, Surgery<br>Rothwell, Diana; Ottawa Hospital Research Institute<br>Al Zayadi, Amal; Ottawa Hospital Research Institute<br>Sundaresan, Sudhir; The Ottawa Hospital<br>Ramsay, Tim; The Ottawa Health Research Institute,<br>Forster, Alan; Ottawa Hospital Research Institute |
| <b>Primary Subject Heading</b>: | Patient-centred medicine                                                                                                                                                                                                                                                                                                     |
| Secondary Subject Heading:      | Communication, Health policy, Patient-centred medicine                                                                                                                                                                                                                                                                       |
| Keywords:                       | HEALTH SERVICES ADMINISTRATION & MANAGEMENT, Patient Experience, Organisation of health services < HEALTH SERVICES ADMINISTRATION & MANAGEMENT, Patient experience                                                                                                                                                           |
|                                 |                                                                                                                                                                                                                                                                                                                              |

SCHOLARONE™  
Manuscripts

Only

1  
2  
3 Impact of patient characteristics on the Canadian Patient Experiences Survey – Inpatient  
4  
5 Care survey- analysis from an academic tertiary care centre  
6  
7  
8  
9

10 Rubens FD<sup>1</sup>, Rothwell DM<sup>2</sup>, Al Zayadi A<sup>2</sup>, Sundaresan S<sup>1</sup>, Ramsay T<sup>2</sup>, Forster A<sup>2,3</sup>

11  
12 1- Department of Surgery, University of Ottawa

13  
14 2- Clinical Epidemiology, Ottawa Hospital Research Institute

15  
16 3- Department of Medicine, University of Ottawa  
17  
18  
19  
20

21 Corresponding author:

22 Fraser Rubens MD MSc FACS FRCSC

23  
24 Professor of Surgery

25  
26 Division of Cardiac Surgery

27  
28 University of Ottawa Heart Institute

29  
30 40 Ruskin St.

31  
32 Ottawa, Ontario

33  
34 Canada

35  
36 K1Y 4W7

37  
38 Fax: 613 696 7303

39  
40 [frubens@ottawaheart.ca](mailto:frubens@ottawaheart.ca)  
41  
42  
43  
44  
45  
46  
47  
48

49 Total word count (including references, tables, legends, limitations and strengths): 6522

50  
51 Abstract word count: 246

52  
53 Running title: Patient experience covariates  
54  
55  
56  
57  
58  
59  
60

**Abstract:**

Objective: To determine the role of patient demographics, care domains and self-perceived health status in the analysis and interpretation of global results from the Canadian Patient Experience Survey-Inpatient Care (CPES-IC).

Design: Cross-sectional survey

Setting: Single large Canadian two campus tertiary care academic centre

Participants: Random sampling of hospital patients post-discharge

Intervention and Main Outcome Measures: Logistic regression models were developed to analyze topbox scoring on four questions of global care (rate experience, recommend hospital, rate hospital, overall helped). Means of each composite domain were correlated to the four overall scores at the patient level to determine Spearman's rank correlation coefficients which were plotted against the overall (hospital) domain score for the key driver analysis.

Results: Topbox scoring was decreased with worse degrees of perceived physical and mental health in all four global questions ( $p < 0.05$ ). Female gender and higher levels of education were associated with worse scoring on rate experience, recommend hospital and rate hospital ( $p < 0.05$ ). Whereas there was a significant difference between hospital departments in unadjusted measures, these differences were no longer evident after adjustment with patient covariates. Key driver analysis identified person-centred care, care transition and the domain related to emergency admission as areas of highest potential for improvement.

Conclusions: Global measures of overall care are influenced by patient-perceived physical and mental health. Caution should be exercised in using patient-satisfaction surveys to compare performance between different health-care provision entities, as

1  
2  
3  
4  
5  
6  
7  
8  
9  
10  
11  
12  
13  
14  
15  
16  
17  
18  
19  
20  
21  
22  
23  
24  
25  
26  
27  
28  
29  
30  
31  
32  
33  
34  
35  
36  
37  
38  
39  
40  
41  
42  
43  
44  
45  
46  
47  
48  
49  
50  
51  
52  
53  
54  
55  
56  
57  
58  
59  
60

apparent differences could be explained by variation in patient mix rather than variation in performance.

For peer review only

1  
2  
3 Strengths and Limitations of Study:  
4

- 5  
6 1) This study involves the novel linkage of a clinical database to individual survey  
7  
8 results to allow the accurate analysis of the role of patient characteristics and  
9  
10 demographics on survey response.  
11  
12 2) The study provides a validated process by which covariates could be used to  
13  
14 adjust patient experience survey outcomes to facilitate inter-unit and inter-  
15  
16 institution comparisons.  
17  
18 3) The analysis has been completed on data from a single institution and thus the  
19  
20 generalizability is not known.  
21  
22 4) This study is limited by survey non-responders as well as the random nature of  
23  
24 survey participants amongst the total discharge population from the hospital.  
25  
26  
27  
28  
29  
30  
31  
32  
33  
34  
35  
36  
37  
38  
39  
40  
41  
42  
43  
44  
45  
46  
47  
48  
49  
50  
51  
52  
53  
54  
55  
56  
57  
58  
59  
60

## Introduction

Patient experience is now recognized as a critical component of modern health care delivery<sup>1</sup>. Aside from the clear rationale to routinely provide compassionate care, there exists a strong ethical basis for physicians to support excellence in this area as it is of vital interest to patients and governments as a foundation of patient-centred medicine<sup>2</sup>. There is also supportive evidence that improved patient experience may positively impact outcomes<sup>1 3</sup> particularly through better compliance to evidence-based guidelines, such as in areas of chronic disease management<sup>4</sup>.

There are many different processes by which inpatient patient experience has been measured internationally<sup>5-8</sup>. In the United States, it is measured using the Hospital Consumer Assessment of Health-Care Provider Systems (HCAHPS) survey<sup>9</sup>. Hospital funding from Medicare is partially dependent on the results from this survey and thus health care organizations are deeply committed to improving results. A modification of the HCAHPS survey (Canadian Patient Experience Survey – Inpatient Care, CPES-IC) was developed through collaboration between the Canadian Institute for Health information (CIHI), Accreditation Canada, the Canadian Patient Safety Institute, the Change Foundation and the Inter-Jurisdictional Patient Experience Group and this survey is now routinely administered in four provinces in Canada<sup>10</sup>.

Though the HCAHPS and the CPES-IC are very similar, there are subtle differences that reflect the unique nature of the single-payer system in Canada. The CPES-IC survey includes 22 questions taken directly from the HCAHPS, but it also includes other questions that “address key areas relevant to the Canadian context”. All of the questions

1  
2  
3 can be classified in three specific groups. In the first group, the questions can be clustered  
4 as they reflect care in particular domains such as doctor communication skills (3  
5 questions) and nursing communication skills (4 questions) amongst others. The Canadian  
6 survey also comprises several questions that constitute new domains not addressed in the  
7 HCAHPS survey such as admission experience (7 questions), person-centred care (7  
8 questions), discharge and transition (3 questions). Further details regarding differences  
9 between the Canadian and American surveys are available on the CIHI web-site  
10 (<https://www.cihi.ca/en/patient-experience>).  
11  
12  
13  
14  
15  
16  
17  
18  
19  
20

21 The composite questions for each domain can be averaged to provide a mean value which  
22 is currently reported at the hospital level for the HCAHPS survey<sup>11</sup>. In the second group  
23 there are four questions that reflect overall or global care that are of particular importance  
24 at the institutional level to assess the quality of patient experience. One of these questions  
25 is also used as a corporate measure of key interest (“Rate your experience?”) and it is  
26 most commonly used to rank hospitals nationally after adjustment for regional  
27 differences<sup>3</sup>. Results from the three other questions related to overall care include;  
28 “Would you recommend this hospital to your friends and family?” (recommend hospital)  
29 and “Using any number from 0 to 10, where 0 is the worst hospital possible and 10 is the  
30 best hospital possible, what number would you use to rate this hospital during your stay?”  
31 (rate hospital) and “Overall, do you feel you were helped by your hospital stay?” (overall  
32 helped). Success in these and other questions are measured by the percent of “topbox”  
33 designation by the patients in which they have ranked a 4 on the recommend hospital  
34 question (on a scale of 1 to 4) or 9 or 10 out of an ordinal scale of 10 for the remaining  
35  
36  
37  
38  
39  
40  
41  
42  
43  
44  
45  
46  
47  
48  
49  
50  
51  
52  
53  
54  
55  
56  
57  
58  
59  
60



1  
2  
3 three questions. The “topbox” metric has been validated and accepted as a marker of  
4  
5 excellence in patient experience measurement.<sup>12</sup>  
6

7  
8 The final group of questions found in both surveys consists of inquiries regarding patient-  
9  
10 perceived health status as well as demographic topics such as race and education. These  
11  
12 questions are referred to a Patient Mix Adjusters (PMA) and they are used in the  
13  
14 HCAHPS survey in order to provide risk adjustment, particularly when comparing  
15  
16 between geographic regions. The PMA questions for the HCAHPS are re-assessed  
17  
18 quarterly by the Centre for Medicare and Medicaid (CMS) after reviewing national  
19  
20 results.  
21  
22

23  
24 There is limited familiarity in the assessment of patient experience in Canada and the use  
25  
26 of such surveys. Although it has been demonstrated that patient sociodemographic factors  
27  
28 such as age, ethnicity, sex and socioeconomic class have been shown to influence patient  
29  
30 experience responses<sup>13</sup>, there is also no understanding of the validity of the PMA  
31  
32 questions in adjusting the results of the CPES-IC survey and how they may contribute to  
33  
34 credibly compare units or departments within a hospital. In summary, it is not clear how  
35  
36 patient factors such as self-described characteristics including perception of mental and  
37  
38 physical health, patient demographics and co-morbidities impact the results of the  
39  
40 Canadian survey on in-hospital patient experience.  
41  
42  
43  
44  
45  
46

47  
48 The overall objective of this research was to understand the role of the self-described  
49  
50 patient characteristics obtained from the survey with covariates obtained from a hospital  
51  
52 database, in the development of a statistical model to predict topbox scoring in the four  
53  
54 survey questions related to overall care; a) rate your experience b) recommend hospital c)  
55  
56  
57  
58  
59  
60

1  
2  
3 rate hospital d) overall helped. We also sought to assess how the PMA questions and  
4  
5 other data from the hospital database influence patient experience at the hospital and  
6  
7 departmental level and to determine how the composite domain measurements influence  
8  
9 the four adjusted global measurements.  
10  
11  
12  
13

## 14 **Methods**

15  
16 This analysis was conducted as a Quality Assurance project. The protocol was reviewed  
17  
18 by the Ottawa Health Science Network – Research Ethics Board and individual patient  
19  
20 consent was waived. Data was collected from April 1, 2016 to Nov 30, 2016 from the  
21  
22 CPES-IC Survey (see appendix 1) administered by National Research Corporation  
23  
24 (Markham, Ontario). Surveys were distributed in both official languages.  
25  
26

27  
28 The data was merged with administrative data collected from The Ottawa Hospital Data  
29  
30 Warehouse (TOHDW) which is a relational database that contains administrative and  
31  
32 clinical data for all patients seen at The Ottawa Hospital. Deciles of income class were  
33  
34 derived using the Postal Code Conversion File Version 6.6 based on data from August  
35  
36 2015 (Statistics Canada). The Elixhauser score was derived using a modification of the  
37  
38 Elixhauser comorbidity measure after applying the latter to the hospital data<sup>14</sup>. The  
39  
40 occurrence of a patient safety indicator (psi) event (i.e. an in-hospital adverse event) was  
41  
42 determined using ICD-10 coding from administrative data<sup>15</sup>. Discharge disposition was  
43  
44 divided into three categories: 1) discharged to the patient's home without support services  
45  
46 2) discharged home or to a home-setting with support services (e.g. senior's lodge,  
47  
48 attendant care, home care, meals on wheels etc.) 3) discharged to another health care  
49  
50  
51  
52  
53  
54  
55  
56  
57  
58  
59  
60

1  
2  
3 facility (e.g. continuing care, acute care inpatient) or other (palliative care/hospice,  
4  
5 addiction treatment etc.).  
6

7  
8 The Ottawa Hospital is a large academic tertiary care teaching centre with two inpatient  
9  
10 campuses. There are 7 admitting departments (Surgery, Medicine, Obstetrics-  
11  
12 Gynecology, ENT, Family Medicine, Ophthalmology and Psychiatry). A different survey  
13  
14 was used in Psychiatry and maternity thus these patients were excluded. Ophthalmology  
15  
16 and rehabilitation medicine were excluded as they are primarily outpatient services and  
17  
18 accounting for less than 1% of admissions. Data from otolaryngology (ENT) was merged  
19  
20 with Surgery due to the combined collaborative quality process. Data from one surgical  
21  
22 and one medical division was not available due to inability to merge to administrative  
23  
24 data.  
25  
26

27  
28 A key driver analysis was performed to determine which of the composite measures  
29  
30 [communication with doctors (questions 5-7), communication with nurses (questions 1-  
31  
32 3), responsiveness of staff (questions 4, 11), communication of medications (questions  
33  
34 16, 17), transition of care (37-39), person-centred care (30-36), direct admission  
35  
36 (questions 24, 25) and emergency admission (26-29)] were important drivers of the most  
37  
38 important global question "Overall Experience". For each composite measure, the mean  
39  
40 was calculated for each patient as long as more than 50% of the questions in the domain  
41  
42 were reported<sup>16</sup>. Spearman's rank correlation coefficients were determined for the  
43  
44 continuous value of each domain and the ordinal global question score and this was  
45  
46 plotted against the overall (hospital) domain score for the key driver analysis<sup>17</sup>. A vertical  
47  
48 line was drawn at the median value of the domain scores. Points identified in quadrant 1  
49  
50  
51  
52  
53  
54  
55  
56  
57  
58  
59  
60

1  
2  
3 represent domains with increased potential for improvement due to high correlation with  
4 a global score and lower mean value.  
5  
6

#### 7 Statistical Analyses:

8 Patient characteristics across department groups were compared using a chi square test.  
9

10 Distribution normality of covariates was tested using the Shapiro-Wilk test.  
11

12 For categorical variables with equal variances, oneway analysis of variance was used to  
13 compare departments, whereas Kruskal-Wallis equality of populations rank test was used  
14 for categorical groups with unequal variances.  
15  
16  
17  
18

19 After dichotomizing each of the four overall care questions [(a) rate experience b)  
20 recommend hospital c) rate hospital d) overall helped] based on topbox response (9 or 10)  
21 or no topbox (<9), we fit a separate logistic regression model for each question to model  
22 the odds of topbox response as a function of the covariates. The association of each  
23 covariate was assessed using likelihood ratio chi square testing. Bonferroni correction  
24 was used for multiple pairwise comparisons. A p value of < 0.05 was considered  
25 significant. Analyses were completed using STATA™ vers. 14.2 (College Station, Tx).  
26  
27  
28  
29  
30  
31  
32  
33  
34  
35  
36  
37  
38  
39

## 40 Results

### 41 Patient Characteristics

42 The survey was sent to 6735 patients, and 2896 patients responded (43%) representing  
43 hospital admissions under the care of 295 physicians (146 medicine, 110 surgery/ENT,  
44 22 family, 17 obstetrics/gynecology). The institution consists of 918 inhospital beds  
45 geographically situated at 2 campuses. Characteristics of the patients from the total group  
46 and from each department are presented in Table 1. There were significant differences  
47  
48  
49  
50  
51  
52  
53  
54  
55  
56  
57  
58  
59  
60

1  
2  
3 between the department groups in terms of physical and mental health, Elixhauser score,  
4 admission status, length of stay, age, discharge disposition, marital status and sex.  
5  
6

#### 7 Topbox Analysis – Overall Measures

8  
9  
10 The results of the multivariable analyses in the derivation of the model for the overall  
11 measures (rate experience, recommend hospital, rate hospital and overall helped) are  
12 presented in Tables 2-5. Worse degrees of perceived physical and mental health were  
13 associated with lower odds of topbox scoring in all four of the questions. There was a  
14 significant relationship with age group in three of four questions with lowest odds ratios  
15 in patients between the ages of 18-34 years, rising in mid-age ranges and falling again in  
16 the elderly. On pairwise comparison the predicted scores in the youngest group were  
17 significantly lower than those in the age groups of 55-64 years and 65-79 years ( $p<0.05$ ).  
18 Increased level of education and female sex were associated with worse scoring in rate  
19 experience, recommend hospital and rate hospital questions. Covariates from the  
20 institutional database that were significant contributors to the models included discharge  
21 disposition (recommend and rate hospital), marital status (recommend hospital) and  
22 urgent/emergent admission (rate experience). Campus site was found to be a factor as a  
23 random effect in rate hospital ( $p<0.05$ ).  
24  
25  
26  
27  
28  
29  
30  
31  
32  
33  
34  
35  
36  
37  
38  
39  
40  
41

42 Adjusted and unadjusted department-based predicted measures for rate experience,  
43 recommend hospital, rate hospital and overall helped are presented in Figures 1 - 4.  
44

45 Unadjusted pairwise comparison of rate experience demonstrated a greater likelihood of  
46 topbox scoring with surgery as compared to medicine however this was not statistically  
47 significant ( $p=0.054$ ). This difference was not seen after adjustment ( $p=0.911$ ).  
48  
49  
50  
51

52 Unadjusted pairwise comparison of the question rate hospital demonstrated a significant  
53  
54  
55  
56  
57  
58  
59  
60

1  
2  
3 increase in surgery as compared to family medicine, however this difference was not  
4  
5 present in the adjusted model. Unadjusted analysis of the overall helped question  
6  
7 demonstrated greater likelihood of topbox scoring in surgery as compared to medicine  
8  
9 and family medicine, as well as obstetrics gynecology as compared to family medicine  
10  
11 (p<0.05) however these comparisons were no longer significant after adjustment for the  
12  
13 covariates in the model.  
14  
15

### 16 17 Key Driver Analysis

18  
19 Key driver analysis of the global question of rate experience is presented in figure 5.  
20  
21 Common domains present in quadrant 1 in all four questions include person-centred care,  
22  
23 care transition and the domain related to emergency admission processes. Similar patterns  
24  
25 were seen with the other three global questions (results not shown).  
26  
27  
28  
29

### 30 31 Discussion

32  
33 Results from the CPES-IC survey administered to patients discharged from a large  
34  
35 Canadian multi-campus health institution were analyzed after merging with a  
36  
37 comprehensive administrative database. Two patient-answered demographic questions  
38  
39 collected from the survey (patient-perceived overall physical and mental health) were  
40  
41 significant covariates predicting topbox recognition in all four of the overall care  
42  
43 questions. Increasing level of education and female sex were associated with decreased  
44  
45 topbox scoring in rate experience, recommend hospital and rate hospital. Age category  
46  
47 was associated with patient experience with the highest topbox scoring in the mid-age  
48  
49 ranges, falling off in younger patients and in octagenarians. The only significant  
50  
51 contributors to the models from the hospital database included marital status (recommend  
52  
53  
54  
55  
56  
57  
58  
59  
60

1  
2  
3 hospital), campus (rate experience and rate hospital), discharge necessitating significant  
4 assistance at home or at another institution (recommend and rate hospital) and  
5  
6 urgent/emergent admission (rate experience). Economic status, in-hospital adverse events  
7  
8 and Elixhauser co-morbidity score did not significantly contribute to the models for the  
9  
10 four questions related to overall care. After adjustment, there was no significant  
11  
12 difference in the predicted measures between the four major departments in any of the  
13  
14 four questions that related to the overall patient experience. Finally, key driver analysis  
15  
16 using these models, confirmed that the greatest yield for interventions at the hospital level  
17  
18 include efforts to improve person-centred care, care transition and the experience for  
19  
20 those being admitted through the emergency department.  
21  
22  
23  
24  
25

26 Patient experience has become a focus of the health care evolution and it has been  
27  
28 recognized as a key interest to consumers and patient advocacy groups. The Institute of  
29  
30 Healthcare Improvement (IHI) a leader in the transformation of the health care system,  
31  
32 has advocated the goal of improving the experience of care within its triple aim of quality  
33  
34 <sup>18</sup>. The Affordable Care Act in collaboration with the Centers for Medicare and Medicaid  
35  
36 Services (CMS) <sup>12</sup> has emphasized the need to deliver care that provides a quality patient  
37  
38 experience. The act has integrated patient experience scores as well as reporting  
39  
40 mandates into hospital reimbursement strategies, which further incentivize excellence.  
41  
42 Patient experience scores are reported nationally in the US<sup>19</sup> and they may be a source of  
43  
44 pride and engagement for health care teams and utilized to compete for patients.  
45  
46  
47  
48

49 The environment is different in Canada as there is currently no financial benefit and  
50  
51 competition between institutions is not a driver for patient services. On the other hand,  
52  
53 federal and provincial government health organizations have embraced patient experience  
54  
55  
56  
57  
58  
59  
60

1  
2  
3 as a priority for health care and they have initiated legislation to support its significance  
4  
5 in quality delivery. Future public reporting of CPES-IC results and national  
6  
7 benchmarking will motivate quality improvement in this area and patient experience  
8  
9 surveying is currently mandatory for hospital accreditation. In Ontario, the Excellent  
10  
11 Care for All Act (2010) established that hospitals must develop sustained processes to  
12  
13 address and improve the patient experience<sup>20</sup>. Our own Institution has raised the profile  
14  
15 of patient experience to the level of a corporate target by integrating it as a foundation of  
16  
17 the vision of the hospital with a priority equal to other quality outcomes and efficiency.  
18  
19 In order to strategize to bring about improvements in patient experience, it is essential to  
20  
21 understand how the current American-based survey applies to Canadian culture and our  
22  
23 single-payer system. Specifically it is crucial to appreciate how to adjust for patient  
24  
25 demographics within different settings, not just to externally compare with other urban  
26  
27 institutions, but also to begin to internally identify factors that may influence overall  
28  
29 scoring and interpretation.  
30  
31  
32  
33  
34

35 The current study is not the first to examine the role of patient and other covariates in the  
36  
37 modeling of measures of overall patient experience in Canada<sup>21</sup>. However in the latter  
38  
39 work, the analysis involved the HCAHPS survey focusing on the single question of rate  
40  
41 experience. The authors did demonstrate a similar relationship with higher level of  
42  
43 education, urgent admission status and longer length of stay as predictive of poorer  
44  
45 measures of experience rating however they did not include patient-perceived physical  
46  
47 and mental health status, both of which were the most consistent and significant  
48  
49 predictors of overall care.  
50  
51  
52  
53  
54  
55  
56  
57  
58  
59  
60



1  
2  
3 It may not be feasible to generalize from the analysis at a single hospital due to the  
4 differing contributions of the patient covariates and interactions with the specific domains  
5 of patient care at each hospital across the country<sup>22</sup>. For example, race was not found to  
6 be a significant factor for most questions unlike in the United States<sup>22</sup>. This finding may  
7 only be relevant in the context of our centre (a medium-sized Canadian city), whereas it  
8 may not apply to larger metropolitan centers such as Toronto and Montreal, where there  
9 may be greater ethnic diversity. On the other hand, the finding that women are less likely  
10 to provide a topbox scoring on questions of overall experience is in keeping with  
11 previous findings with the HCAHPS survey<sup>23</sup>.  
12  
13

14 Patient experience key driver analysis has been utilized to focus attention and initiatives  
15 in patient-care areas with high potential to impact on the overall global measures of care.  
16 The new CPES-IC survey has been designed to not only include domains currently in the  
17 HCAHPS survey, but also domains reflecting patient-centred care, transition of care and  
18 the processes of direct or emergency admission. Although these new domains have not  
19 been formally validated in the Canadian context, they were all identified as areas of  
20 potential high yield in our study in terms of overall contribution to the patient experience.  
21 Many of these questions refer to key issues of team communication and the perception of  
22 coordination of care; items that could be addressed through team re-structuring,  
23 checklists and scheduling. On the other hand, nursing and doctor communication skills,  
24 though important, did not support targets of high yield in terms of hospital resources.  
25 There are multiple important implications of this work. The analysis highlights the  
26 differences in adjusted and unadjusted rankings between departments, which emphasize  
27 the importance of the use of the demographic and other covariates obtained from the  
28  
29  
30  
31  
32  
33  
34  
35  
36  
37  
38  
39  
40  
41  
42  
43  
44  
45  
46  
47  
48  
49  
50  
51  
52  
53  
54  
55  
56  
57  
58  
59  
60

1  
2  
3 survey such as perception of physical and mental health and education level. The adjusted  
4  
5 improved measures in Medicine and Family Medicine underscore that chronic disease  
6  
7 and comorbidity must be taken into account in patient experience initiatives. Recognition  
8  
9 of adjusted results also enhances engagement of staff who face the challenges of chronic  
10  
11 disease care and provides the opportunity to follow for improvements.  
12  
13

14  
15 The analysis may be limited by unknown and unmeasured covariates. Only a few of the  
16  
17 covariates from the administrative database were significant in models describing  
18  
19 perceptions of excellence in individual questions of overall care (length of stay, ICU stay,  
20  
21 marital status). Further work will be necessary to determine if these administrative  
22  
23 database variables are important at model development at the unit or provider level.  
24  
25

26  
27 Although there was no difference between departments in any of the questions, more  
28  
29 subtle comparisons such as between divisions and services may be important in  
30  
31 understanding how to advance patient experience initiatives. There is some evidence that  
32  
33 non-responders to the survey may have different demographic profiles as compared to  
34  
35 responders, affecting generalization of the results<sup>24</sup>. Finally, patient care domains were  
36  
37 not included as covariates in the derivation of the multivariable models for the global  
38  
39 overall questions. We elected not to do this as we felt the domains as covariates would  
40  
41 demonstrate significant bias due to their correlation not only to the outcomes but also to  
42  
43 many of the other predictors. Therefore, we elected rather to look at their interactions and  
44  
45 correlations using key driver analysis.  
46  
47

48  
49 In summary, this analysis provides a perspective on drivers that must be considered when  
50  
51 assessing patients' perceptions on the overall care at a health care institution in Canada.  
52  
53  
54  
55  
56  
57  
58  
59  
60

1  
2  
3  
4  
5  
6  
7  
8  
9  
10  
11  
12  
13  
14  
15  
16  
17  
18  
19  
20  
21  
22  
23  
24  
25  
26  
27  
28  
29  
30  
31  
32  
33  
34  
35  
36  
37  
38  
39  
40  
41  
42  
43  
44  
45  
46  
47  
48  
49  
50  
51  
52  
53  
54  
55  
56  
57  
58  
59  
60

This understanding will form the basis for a strategy of thoughtful data-driven targeted interventions to improve the patient experience.

For peer review only

1  
2  
3 Figure Legends:  
4

5 Figure 1: Unadjusted and adjusted predicted percent topbox of corporate indicator “Rate  
6 your experience” by hospital department. Error bars represent 95% CI. Difference  
7  
8 between Surgery/ENT and Medicine significant ( $p=0.05$ ) in Unadjusted, however no  
9  
10 differences between departments in Adjusted  
11  
12  
13

14 Figure 2: Unadjusted and adjusted predicted percent topbox of corporate indicator  
15 “Recommend this hospital” by hospital department. Error bars represent 95% CI. No  
16  
17 statistically significant difference between groups.  
18  
19  
20

21 Figure 3: Unadjusted and adjusted predicted percent topbox of corporate indicator “Rate  
22 this hospital” by hospital department. Error bars represent 95% CI. Differences between  
23  
24 Surgery/ENT and Family Medicine significant ( $p<0.05$ ) in the unadjusted model but not  
25  
26 in the adjusted model.  
27  
28  
29

30 Figure 4: Unadjusted and adjusted predicted percent topbox of corporate indicator  
31 “Overall helped” by hospital department. Error bars represent 95% CI. In the unadjusted  
32  
33 model, greater predicted measures were seen with surgery as compared to medicine and  
34  
35 family medicine, and with obstetrics/gynecology as compared with family medicine  
36  
37 ( $p<0.05$ ). The differences were no longer significant in the adjusted model.  
38  
39  
40  
41

42 Figure 5: Key driver analysis: relationship domain composite measures to the global  
43  
44 measure of Overall Experience, direct admission (left) and emergency admission(right).  
45  
46 Horizontal black dotted line – mean for all correlation values. Vertical red dotted line –  
47  
48 median for all composites. A- Communication doctors, B- Communication nurses, C-  
49  
50 Responsiveness staff, D-Care transition, E-Person-centred care, F-Pain management, G-  
51  
52  
53  
54  
55  
56  
57  
58  
59  
60

1  
2  
3  
4  
5  
6  
7  
8  
9  
10  
11  
12  
13  
14  
15  
16  
17  
18  
19  
20  
21  
22  
23  
24  
25  
26  
27  
28  
29  
30  
31  
32  
33  
34  
35  
36  
37  
38  
39  
40  
41  
42  
43  
44  
45  
46  
47  
48  
49  
50  
51  
52  
53  
54  
55  
56  
57  
58  
59  
60

Communication medications, H – Admission processes emergency, I – Admission  
processes elective

For peer review only

1  
2  
3 **Contributorship Statement:** We certify that all of the authors have fulfilled the  
4 following four criteria to justify authorship:  
5

- 6
- 7 • Substantial contributions to the conception or design of the work (F.D.R, S.S., A.F.); or
  - 8 the acquisition, analysis, or interpretation of data for the work (D.R., A.A.Z., T.R.); AND
  - 9
  - 10 • Drafting the work or revising it critically for important intellectual content (F.D.R.,
  - 11 D.R., S.S., T.R., A.F.); AND
  - 12
  - 13 • Final approval of the version to be published (F.D.R., D.R., A.A.Z., S.S., T. R., A. F.;
  - 14 AND
  - 15
  - 16 • Agreement to be accountable for all aspects of the work in ensuring that questions
  - 17 related to the accuracy or integrity of any part of the work are appropriately investigated
  - 18 and resolved. (F. D. R., D. R., A. A. Z., S. S. , T. R. , A. F.
  - 19
  - 20
  - 21
  - 22
  - 23
  - 24
  - 25
  - 26
  - 27
  - 28

29 **Competing Interests:** IAl authors have completed the ICMJE uniform disclosure form  
30 at [www.icmje.org/coi\\_disclosure.pdf](http://www.icmje.org/coi_disclosure.pdf) and declare: no support from any organisation for  
31 the submitted work; no financial relationships with any organisations that might have an  
32 interest in the submitted work in the previous three years; no other relationships or  
33 activities that could appear to have influenced the submitted work.  
34

35 **Funding:** None  
36

37 **Data Sharing:** There is no additional unpublished data from the study. The study data is  
38 partially de-anonymized and therefore it is kept on a secure server at the Ottawa Hospital.  
39  
40  
41  
42  
43  
44  
45  
46  
47  
48  
49  
50  
51  
52  
53  
54  
55  
56  
57  
58  
59  
60

## References

1. Jha AK, Orav EJ, Zheng J, et al. Patients' perception of hospital care in the United States. *N Engl J Med* 2008;359(18):1921-31. doi: 10.1056/NEJMsa0804116
2. An act to amend various acts in the interest of patient-centred care. Legislative Assembly of Ontario. 1st Session ed, 2016.
3. Sacks GD, Lawson EH, Dawes AJ, et al. Relationship Between Hospital Performance on a Patient Satisfaction Survey and Surgical Quality. *JAMA Surg* 2015;150(9):858-64. doi: 10.1001/jamasurg.2015.1108
4. Anhang Price R, Elliott MN, Zaslavsky AM, et al. Examining the role of patient experience surveys in measuring health care quality. *Medical care research and review : MCRR* 2014;71(5):522-54. doi: 10.1177/1077558714541480
5. Arah OA, ten Asbroek AH, Delnoij DM, et al. Psychometric properties of the Dutch version of the Hospital-level Consumer Assessment of Health Plans Survey instrument. *Health Serv Res* 2006;41(1):284-301. doi: 10.1111/j.1475-6773.2005.00462.x
6. Krol MW, de Boer D, Rademakers JJ, et al. Overall scores as an alternative to global ratings in patient experience surveys; a comparison of four methods. *BMC Health Serv Res* 2013;13:479. doi: 10.1186/1472-6963-13-479
7. Sullivan P, Bell D. Investigation of the degree of organisational influence on patient experience scores in acute medical admission units in all acute hospitals in England using multilevel hierarchical regression modelling. *BMJ Open* 2017;7(1):e012133. doi: 10.1136/bmjopen-2016-012133

- 1  
2  
3 8. Hekkert KD, Cihangir S, Kleefstra SM, et al. Patient satisfaction revisited: a multilevel  
4  
5 approach. *Soc Sci Med* 2009;69(1):68-75. doi: 10.1016/j.socscimed.2009.04.016  
6  
7
- 8 9. Giordano LA, Elliott MN, Goldstein E, et al. Development, implementation, and  
9  
10 public reporting of the HCAHPS survey. *Medical care research and review* :  
11  
12 *MCRR* 2010;67(1):27-37. doi: 10.1177/1077558709341065  
13  
14
- 15 10. CIHI. Canadian Patient Experiences Survey — Inpatient Care Procedure Manual  
16  
17 2016 [Available from: ([https://www.cihi.ca/sites/default/files/document/cpes-ic-  
20  
21 procedure-manual-en.pdf](https://www.cihi.ca/sites/default/files/document/cpes-ic-<br/>18<br/>19 procedure-manual-en.pdf)].  
22
- 23 11. Medicare. Medicare.gov | Hospital Compare 2017 [Available from:  
24  
25 <http://www.hospitalcompare.hhs.gov>.  
26
- 27 12. CMS Quality Strategy 2016 [Available from:  
28  
29 [https://www.cms.gov/Medicare/Quality-Initiatives-Patient-Assessment-  
32  
33 Instruments/QualityInitiativesGenInfo/Downloads/CMS-Quality-Strategy.pdf](https://www.cms.gov/Medicare/Quality-Initiatives-Patient-Assessment-<br/>30<br/>31 Instruments/QualityInitiativesGenInfo/Downloads/CMS-Quality-Strategy.pdf)  
34  
35 accessed May 22, 2017.
- 36 13. Hall JA, Dornan MC. Patient sociodemographic characteristics as predictors of  
37  
38 satisfaction with medical care: a meta-analysis. *Soc Sci Med* 1990;30(7):811-8.  
39
- 40 14. van Walraven C, Austin PC, Jennings A, et al. A modification of the Elixhauser  
41  
42 comorbidity measures into a point system for hospital death using administrative  
43  
44 data. *Med Care* 2009;47(6):626-33. doi: 10.1097/MLR.0b013e31819432e5  
45  
46
- 47 15. Southern DA, Burnand B, Droesler SE, et al. Deriving ICD-10 Codes for Patient  
48  
49 Safety Indicators for Large-scale Surveillance Using Administrative Hospital  
50  
51 Data. *Med Care* 2017;55(3):252-60. doi: 10.1097/MLR.0000000000000649  
52  
53  
54  
55  
56  
57  
58  
59



- 1  
2  
3 16. Rodriguez HP, von Glahn T, Chang H, et al. Measuring patients' experiences with  
4  
5 individual specialist physicians and their practices. *Am J Med Qual*  
6  
7 2009;24(1):35-44. doi: 10.1177/1062860608326418  
8  
9
- 10 17. Thiels CA, Hanson KT, Yost KJ, et al. Effect of Hospital Case Mix on the Hospital  
11  
12 Consumer Assessment of Healthcare Providers and Systems Star Scores: Are All  
13  
14 Stars the Same? *Ann Surg* 2016;264(4):666-73. doi:  
15  
16 10.1097/SLA.0000000000001847  
17  
18
- 19 18. Improvement IfHC. Triple aim for populations [Available from:  
20  
21 <http://www.ihf.org/Topics/TripleAim/Pages/default.aspx> accessed May 22, 2017  
22  
23 2017.  
24  
25
- 26 19. CAHPS Hospital Survey [Available from: <http://www.hcahpsonline.org/home.aspx>  
27  
28 accessed May 22, 2017.  
29  
30
- 31 20. Calculation of HCAHPS Scores: From Raw Data to Publicly Reported Results  
32  
33 [Centers for Medicare and Medicaid Services web site] [Available from:  
34  
35 <http://www.hcahpsonline.org/Files/Calculation> of HCAHPS Scores.pdf. ).2011.  
36  
37
- 38 21. Kemp KA, Chan N, McCormack B, et al. Drivers of Inpatient Hospital Experience  
39  
40 Using the HCAHPS Survey in a Canadian Setting. *Health Serv Res*  
41  
42 2015;50(4):982-97. doi: 10.1111/1475-6773.12271  
43  
44
- 45 22. Elliott MN, Lehrman WG, Goldstein E, et al. Do hospitals rank differently on  
46  
47 HCAHPS for different patient subgroups? *Medical care research and review* :  
48  
49 *MCCR* 2010;67(1):56-73. doi: 10.1177/1077558709339066  
50  
51  
52  
53  
54  
55  
56  
57  
58  
59  
60

- 1  
2  
3 23. Elliott MN, Lehrman WG, Beckett MK, et al. Gender differences in patients'  
4 perceptions of inpatient care. *Health Serv Res* 2012;47(4):1482-501. doi:  
5  
6 10.1111/j.1475-6773.2012.01389.x  
7  
8  
9  
10 24. Rubens FD, Chen L, Ramsay T, et al. The development of a positive deviancy  
11 strategy to identify excellence in patient experience. *European Journal for Person*  
12  
13 *Centred Healthcare* 2018;In Press  
14  
15  
16  
17  
18  
19  
20  
21  
22  
23  
24  
25  
26  
27  
28  
29  
30  
31  
32  
33  
34  
35  
36  
37  
38  
39  
40  
41  
42  
43  
44  
45  
46  
47  
48  
49  
50  
51  
52  
53  
54  
55  
56  
57  
58  
59  
60

|                                   | <b>Total<br/>(n=2896)</b> | <b>Surgery<br/>(n=1699)</b> | <b>Medicine<br/>(n=1023)</b> | <b>Family<br/>Medicine<br/>(n=79)</b> | <b>Obs/Gyn<br/>(n=95)</b> | <b><i>p</i></b> |
|-----------------------------------|---------------------------|-----------------------------|------------------------------|---------------------------------------|---------------------------|-----------------|
| <b>Physical health, n(%)</b>      |                           |                             |                              |                                       |                           | <0.001          |
| Excellent                         | 270 (9.3)                 | 210 (12.4)                  | 45 (4.4)                     | 4 (5.1)                               | 11 (11.5)                 |                 |
| Very Good                         | 803 (27.7)                | 583 (34.3)                  | 166 (16.2)                   | 8 (10.1)                              | 46 (48.4)                 |                 |
| Good                              | 999 (34.5)                | 612 (36.0)                  | 328 (32.1)                   | 37 (46.8)                             | 22 (23.2)                 |                 |
| Fair                              | 605 (20.9)                | 243 (14.3)                  | 329 (32.2)                   | 19 (24.1)                             | 14 (14.7)                 |                 |
| Poor                              | 219 (7.6)                 | 51 (3)                      | 155 (15.2)                   | 11 (13.9)                             | 2 (2.1)                   |                 |
| <b>Mental health, n(%)</b>        |                           |                             |                              |                                       |                           | <0.001          |
| Excellent                         | 697 (24.1)                | 484 (28.5)                  | 180 (17.5)                   | 10 (12.8)                             | 23 (29.2)                 |                 |
| Very Good                         | 1026 (35.4)               | 636 (37.5)                  | 323 (31.5)                   | 25 (32.1)                             | 42 (44.2)                 |                 |
| Good                              | 776 (26.8)                | 411 (24.2)                  | 321 (31.3)                   | 24 (30.8)                             | 20 (21.1)                 |                 |
| Fair                              | 325 (11.2)                | 141 (8.3)                   | 160 (15.6)                   | 15 (19.2)                             | 9 (9.5)                   |                 |
| Poor                              | 74 (2.6)                  | 26 (1.5)                    | 43 (4.2)                     | 4 (5.1)                               | 1 (1.1)                   |                 |
| <b>Education, n(%)</b>            |                           |                             |                              |                                       |                           | 0.29            |
| 8th Grade                         | 180 (6.4)                 | 92 (5.6)                    | 78 (7.8)                     | 8 (10.4)                              | 2 (2.2)                   |                 |
| College/CEGEP                     | 664 (23.5)                | 417 (25.2)                  | 214 (21.4)                   | 12 (15.6)                             | 21 (22.8)                 |                 |
| Some High School                  | 309 (11.0)                | 178 (10.8)                  | 109 (10.9)                   | 12 (15.6)                             | 10 (10.9)                 |                 |
| High School                       | 674 (23.9)                | 370 (22.4)                  | 270 (27.0)                   | 18 (23.4)                             | 16 (17.4)                 |                 |
| Undergraduate                     | 452 (16.0)                | 265 (11.0)                  | 156 (15.6)                   | 15 (19.5)                             | 16 (17.4)                 |                 |
| Post Graduate                     | 542 (19.2)                | 331 (20.0)                  | 172 (17.2)                   | 12 (15.6)                             | 27 (29.4)                 |                 |
| <b>Race, n(%)</b>                 |                           |                             |                              |                                       |                           | 0.22            |
| White                             | 2555 (89.7)               | 1518 (90.7)                 | 896 (89.2)                   | 62 (79.5)                             | 79 (84.0)                 |                 |
| Black                             | 53 (1.9)                  | 26 (1.6)                    | 26 (2.6)                     | 1 (1.3)                               | 0                         |                 |
| Arab                              | 43 (1.5)                  | 25 (1.5)                    | 13 (1.3)                     | 2 (2.6)                               | 3 (3.2)                   |                 |
| First Nation                      | 20 (0.7)                  | 13 (0.8)                    | 5 (0.5)                      | 1 (1.3)                               | 1 (1.1)                   |                 |
| Oriental                          | 69 (2.4)                  | 36 (2.2)                    | 30 (3.0)                     | 3 (3.9)                               | 0                         |                 |
| Indian                            | 54 (1.9)                  | 24 (1.4)                    | 22 (22.2)                    | 4 (5.1)                               | 4 (4.3)                   |                 |
| Other                             | 55 (1.9)                  | 31 (1.9)                    | 12 (1.2)                     | 5 (6.4)                               | 7 (7.5)                   |                 |
| <b>Elixscore,<br/>median(IQR)</b> | 0(0,4)                    | 0(0,4)                      | 4(0,9)                       | 0(0,5)                                | 0(0,4)                    | <0.001          |
| <b>Admit, n(%)</b>                |                           |                             |                              |                                       |                           | <0.001          |
| Elective                          | 1037 (35.2)               | 896 (52.1)                  | 79 (7.5)                     | 0                                     | 62 (65.3)                 |                 |
| Emergent                          | 1911 (64.8)               | 824 (47.9)                  | 973 (92.5)                   | 81 (100)                              | 33 (34.7)                 |                 |
| <b>Age group, n(%)</b>            |                           |                             |                              |                                       |                           | <0.001          |
| 18-34                             | 134 (4.6)                 | 90 (5.2)                    | 39 (3.7)                     | 2 (2.5)                               | 3 (3.2)                   |                 |
| 35-44                             | 152 (5.2)                 | 89 (5.2)                    | 46 (4.4)                     | 3 (3.7)                               | 14 (14.7)                 |                 |
| 45-54                             | 313 (10.6)                | 219 (12.7)                  | 80 (7.6)                     | 0                                     | 14 (14.7)                 |                 |
| 55-64                             | 622 (21.1)                | 383 (22.3)                  | 202 (19.2)                   | 10 (12.4)                             | 27 (28.4)                 |                 |
| 65-79                             | 1136 (38.6)               | 687 (39.9)                  | 394 (37.5)                   | 25 (30.9)                             | 30 (31.6)                 |                 |
| >79                               | 590 (20.0)                | 252 (14.7)                  | 290 (27.6)                   | 41 (50.6)                             | 7 (7.4)                   |                 |

|                                     |             |             |            |           |           |        |
|-------------------------------------|-------------|-------------|------------|-----------|-----------|--------|
| <b>Any psi, n(%)</b>                | 321 (10.9)  | 205 (11.9)  | 96 (9.1)   | 10 (12.4) | 10 (10.5) | 0.15   |
| <b>LOS (days), median(IQR)</b>      | 4 (2, 7)    | 3 (2, 6)    | 5 (3, 8)   | 5 (3, 9)  | 3 (2, 4)  | <0.001 |
| <b>Income decile, median(IQR)</b>   | 8 (5, 9)    | 8 (5, 9)    | 8 (5, 9)   | 8 (5, 9)  | 8 (6, 9)  | 0.62   |
| <b>ICU, n(%)</b>                    | 102 (3.5)   | 60 (3.5)    | 41 (3.9)   | 1 (1.2)   | 0         | 0.91   |
| <b>Married/ partner, n(%)</b>       | 1904 (64.6) | 1153 (67.0) | 650 (61.8) | 42 (51.9) | 59 (62.1) | 0.003  |
| <b>Sex female, n(%)</b>             | 1435 (48.7) | 794 (41.2)  | 502 (47.7) | 45 (55.6) | 100       | <0.001 |
| <b>Campus A, n(%)</b>               | 1308 (43.8) | 834 (48.5)  | 423 (40.2) | 51 (63.0) | 0         | <0.001 |
| <b>ED visit within 7 days, n(%)</b> | 226 (7.6)   | 144 (8.4)   | 68 (6.5)   | 8 (9.9)   | 5 (5.3)   | 0.20   |
| <b>Discharge disposition, n(%)</b>  |             |             |            |           |           | <0.001 |
| Home                                | 1875 (63.7) | 1220 (71.1) | 548 (52.2) | 35 (43.2) | 72 (75.8) |        |
| Home-setting                        | 850 (28.9)  | 367 (21.4)  | 425 (40.5) | 37 (45.7) | 21 (22.1) |        |
| Another health facility             | 217 (7.4)   | 130 (7.6)   | 76 (7.2)   | 9 (11.1)  | 2 (2.1)   |        |

Table 1: Characteristics of patients answering patient experience survey. In some groups, due to missing data (<0.1%), the totals by summation does not equal the number stated in the first row. Abbreviations: Elixscore – Elixhauser score, psi – patient safety indicator event, LOS – length of stay, ALC – alternate level of care at discharge, ICU – intensive care unit stay.

|                        | <i>Univariable Analysis</i> | <i>p</i> | <i>Multivariable Analysis</i> | <i>p</i> | <b>LR test<br/>(<i>p</i>)</b> |
|------------------------|-----------------------------|----------|-------------------------------|----------|-------------------------------|
| <b>Department</b>      |                             |          |                               |          | 0.60                          |
| Surgery/ENT            | reference                   |          | reference                     |          |                               |
| Medicine               | 0.80(0.67, 0.94)            | 0.008    | 1.11 (0.89, 1.39)             | 0.34     |                               |
| Family                 | 0.55(0.35, 0.88)            | 0.012    | 0.92 (0.54, 1.55)             | 0.75     |                               |
| Obs/Gyn                | 0.91(0.58, 1.42)            | 0.67     | 0.84 (0.51, 1.39)             | 0.50     |                               |
| <b>Physical Health</b> |                             |          |                               |          | 0.001                         |
| Excellent              | reference                   |          | reference                     |          |                               |
| Very Good              | 0.68(0.47, 0.97)            | 0.034    | 0.74(0.50, 1.09)              | 0.12     |                               |
| Good                   | 0.41(0.29, 0.58)            | <0.001   | 0.51(0.35, 0.76)              | 0.001    |                               |
| Fair                   | 0.36(0.25, 0.52)            | <0.001   | 0.51(0.33, 0.78)              | 0.002    |                               |
| Poor                   | 0.27(0.18, 0.41)            | <0.001   | 0.42(0.25, 0.71)              | 0.001    |                               |
| <b>Mental Health</b>   |                             |          |                               |          | <0.001                        |
| Excellent              | reference                   |          | reference                     |          |                               |
| Very Good              | 0.72(0.57, 0.91)            | 0.005    | 0.77(0.59, 0.99)              | 0.042    |                               |
| Good                   | 0.49(0.39, 0.62)            | <0.001   | 0.58(0.43, 0.76)              | <0.001   |                               |
| Fair                   | 0.34(0.25, 0.45)            | <0.001   | 0.43(0.30, 0.61)              | <0.001   |                               |
| Poor                   | 0.25(0.15, 0.42)            | <0.001   | 0.39(0.21, 0.72)              | 0.002    |                               |
| <b>Education</b>       |                             |          |                               |          | <0.001                        |
| 8th Grade              | reference                   |          | reference                     |          |                               |
| Some High School       | 1.10(0.71, 1.69)            | 0.67     | 1.04(0.65, 1.66)              | 0.87     |                               |
| High School            | 0.82(0.56, 1.19)            | 0.30     | 0.68(0.45, 1.04)              | 0.07     |                               |
| College/CEGEP          | 0.72(0.50, 1.05)            | 0.09     | 0.56(0.37, 0.85)              | 0.007    |                               |
| Undergraduate          | 0.65(0.44, 0.96)            | 0.032    | 0.44(0.28, 0.68)              | <0.001   |                               |
| Post Graduate          | 0.66(0.45, 0.97)            | 0.033    | 0.42(0.27, 0.65)              | <0.001   |                               |
| <b>Admit-Urgent</b>    | 0.64(0.54, 0.76)            | <0.001   | 0.83(0.67, 1.03)              | 0.016    | 0.016                         |
| <b>Sex Male</b>        | 1.21(1.03, 1.42)            | 0.021    | 1.20(1.00, 1.44)              | 0.024    | 0.024                         |
| <b>Race</b>            |                             |          |                               |          | 0.21                          |
| White                  | reference                   |          | reference                     |          |                               |
| Black                  | 1.19(0.64, 2.20)            | 0.59     | 1.42(0.71, 2.84)              | 0.32     |                               |
| Arab                   | 0.98(0.50, 1.89)            | 0.94     | 0.98(0.49, 1.97)              | 0.96     |                               |
| First Nation           | 0.69(0.27, 1.78)            | 0.44     | 0.57(0.19, 1.73)              | 0.32     |                               |
| Oriental               | 1.05(0.62, 1.78)            | 0.86     | 1.45(0.82, 2.58)              | 0.20     |                               |
| Indian                 | 0.78(0.44, 1.38)            | 0.40     | 1.12(0.59, 2.10)              | 0.73     |                               |
| Other                  | 0.57(0.33, 0.99)            | 0.045    | 0.52(0.28, 0.95)              | 0.034    |                               |
| <b>Elixscore*</b>      | 0.88(0.73, 1.06)            | 0.18     | 0.96(0.77, 1.19)              | 0.69     | 0.69                          |
| <b>Age Group</b>       |                             |          |                               |          | 0.006                         |
| 18-34                  | reference                   |          | reference                     |          |                               |
| 35-44                  | 1.46(0.90, 2.36)            | 0.126    | 1.69(1.00, 2.86)              | 0.049    |                               |
| 45-54                  | 1.54(1.01, 2.33)            | 0.044    | 1.77(1.13, 2.79)              | 0.013    |                               |
| 55-64                  | 1.97(1.34, 2.90)            | 0.001    | 2.32(1.52, 3.56)              | <0.001   |                               |

|                                               |                  |        |                  |        |       |
|-----------------------------------------------|------------------|--------|------------------|--------|-------|
| 65-79                                         | 1.85(1.28, 2.66) | 0.001  | 2.10(1.39, 3.17) | <0.001 |       |
| ≥80                                           | 1.45(0.98, 2.13) | 0.060  | 1.93(1.25, 3.00) | 0.003  |       |
| <b>Any psi</b>                                | 0.80(0.62, 1.02) | 0.076  | 0.97(0.72, 1.30) | 0.99   | 0.98  |
| <b>LOS (&gt;3 days)</b>                       | 0.70(0.59, 0.82) | <0.001 | 0.87(0.70, 1.06) | 0.13   | 0.13  |
| <b>Income decile</b>                          | 1.00(0.97, 1.03) | 0.932  | 1.01(0.98, 1.04) | 0.54   | 0.54  |
| <b>ICU</b>                                    | 0.99(0.64, 1.53) | 0.949  | 1.22(0.74, 2.01) | 0.39   | 0.39  |
| <b>Married/Partner</b>                        | 1.06(0.90, 1.25) | 0.498  | 0.92(0.76, 1.12) | 0.39   | 0.39  |
| <b>Emergency visit within 7 days post d/c</b> | 0.74(0.56, 0.99) | 0.045  | 0.77(0.56, 1.06) | 0.10   | 0.11  |
| <b>Discharge</b>                              |                  |        |                  |        | 0.11  |
| Home                                          | reference        |        | reference        |        |       |
| Home setting                                  | 0.70(0.59, 0.84) | <0.001 | 0.90(0.72, 1.12) | 0.35   |       |
| Another facility                              | 0.55(0.41, 0.74) | <0.001 | 0.68(0.48, 0.97) | 0.035  |       |
| <b>Campus</b>                                 | 1.21(1.03, 1.42) | 0.018  | 1.22(1.02, 1.47) | 0.031  | 0.031 |

Table 2: Analysis of covariates associated with topbox designation of the corporate measure of “Rate experience”. \*Elixscore log-transformed. Abbreviations: Elixscore – Elixhauser score, psi – patient safety indicator event, LOS – length of stay, ICU – intensive care unit stay, LR – likelihood ratio

|                        | <b>Univariable Analysis</b> | <b><i>p</i></b> | <b>Multivariable Analysis</b> | <b><i>p</i></b> | <b>LR test<br/>(<i>p</i>)</b> |
|------------------------|-----------------------------|-----------------|-------------------------------|-----------------|-------------------------------|
| <b>Department</b>      |                             |                 |                               |                 | 0.89                          |
| Surgery/ENT            | reference                   |                 | reference                     |                 |                               |
| Medicine               | 0.86(0.72, 1.02)            | 0.09            | 1.08(0.85, 1.36)              | 0.53            |                               |
| Family                 | 0.63(0.39, 1.02)            | 0.06            | 0.92(0.53, 1.59)              | 0.77            |                               |
| Obs/Gyn                | 0.88(0.55, 1.41)            | 0.59            | 0.98(0.58, 1.65)              | 0.94            |                               |
| <b>Physical Health</b> |                             |                 |                               |                 | 0.026                         |
| Excellent              | reference                   |                 | reference                     |                 |                               |
| Very Good              | 0.72(0.49, 1.04)            | 0.08            | 0.77(0.51, 1.16)              | 0.21            |                               |
| Good                   | 0.48(0.34, 0.69)            | <0.001          | 0.56(0.37, 0.84)              | 0.006           |                               |
| Fair                   | 0.43(0.30, 0.63)            | <0.001          | 0.58(0.37, 0.91)              | 0.019           |                               |
| Poor                   | 0.36(0.23, 0.56)            | <0.001          | 0.58(0.34, 0.99)              | 0.048           |                               |
| <b>Mental Health</b>   |                             |                 |                               |                 | <0.001                        |
| Excellent              | reference                   |                 | reference                     |                 |                               |
| Very Good              | 0.82(0.65, 1.05)            | 0.12            | 0.89(0.68, 1.17)              | 0.40            |                               |
| Good                   | 0.51(0.40, 0.65)            | <0.001          | 0.63(0.47, 0.84)              | 0.002           |                               |
| Fair                   | 0.44(0.32, 0.59)            | <0.001          | 0.55(0.38, 0.80)              | 0.002           |                               |
| Poor                   | 0.28(0.17, 0.46)            | <0.001          | 0.39(0.22, 0.72)              | 0.002           |                               |
| <b>Education</b>       |                             |                 |                               |                 | <0.001                        |
| 8th Grade              | reference                   |                 | reference                     |                 |                               |
| Some High School       | 1.21(0.78, 1.89)            | 0.39            | 1.06(0.66, 1.70)              | 0.82            |                               |
| High School            | 1.08(0.73, 1.59)            | 0.70            | 0.95(0.62, 1.45)              | 0.80            |                               |
| College/CEGEP          | 0.86(0.58, 1.26)            | 0.43            | 0.68(0.44, 1.04)              | 0.07            |                               |
| Undergraduate          | 0.79(0.53, 1.18)            | 0.25            | 0.57(0.36, 0.89)              | 0.014           |                               |
| Post Graduate          | 0.94(0.63, 1.39)            | 0.76            | 0.64(0.41, 0.99)              | 0.046           |                               |
| <b>Race</b>            |                             |                 |                               |                 | <0.001                        |
| White                  | reference                   |                 | reference                     |                 |                               |
| Black                  | 5.69(1.77, 18.31)           | 0.004           | 5.55(1.70, 18.19)             | 0.005           |                               |
| Arab                   | 1.49(0.69, 3.24)            | 0.31            | 1.57(0.70, 3.49)              | 0.27            |                               |
| First Nation           | 0.42(0.17, 1.01)            | 0.053           | 0.38(0.13, 1.09)              | 0.07            |                               |
| Oriental               | 1.77(0.92, 3.40)            | 0.09            | 2.07(1.06, 4.05)              | 0.034           |                               |
| Indian                 | 1.20(0.63, 2.28)            | 0.59            | 1.60(0.79, 3.23)              | 0.19            |                               |
| Other                  | 0.58(0.33, 1.02)            | 0.057           | 0.49(0.27, 0.90)              | 0.021           |                               |
| <b>Elixscore*</b>      | 0.90(0.74, 1.10)            | 0.30            | 0.97(0.77, 1.22)              | 0.80            | 0.80                          |
| <b>Admit Urgent</b>    | 0.83(0.69, 0.99)            | 0.036           | 1.00(0.80, 1.25)              | 0.99            | 0.99                          |
| <b>Age Group</b>       |                             |                 |                               |                 | 0.045                         |
| 18-34                  | reference                   |                 | reference                     |                 |                               |
| 35-44                  | 1.04(0.62, 1.74)            | 0.89            | 1.19(0.68, 2.07)              | 0.54            |                               |
| 45-54                  | 1.40(0.88, 2.22)            | 0.15            | 1.87(1.13, 3.07)              | 0.014           |                               |
| 55-64                  | 1.32(0.87, 2.01)            | 0.19            | 1.85(1.17, 2.93)              | 0.009           |                               |
| 65-79                  | 1.23(0.82, 1.83)            | 0.31            | 1.57(1.01, 2.44)              | 0.045           |                               |

|                                               |                  |        |                  |       |        |
|-----------------------------------------------|------------------|--------|------------------|-------|--------|
| >79                                           | 0.93(0.62, 1.42) | 0.75   | 1.39(0.87, 2.21) | 0.17  |        |
| <b>Any psi</b>                                | 0.87(0.67, 1.13) | 0.31   | 1.11(0.81, 1.52) | 0.50  | 0.50   |
| <b>LOS &gt; 3 days</b>                        | 0.76(0.64, 0.89) | 0.001  | 0.87(0.70, 1.08) | 0.22  | 0.22   |
| <b>Income decile</b>                          | 0.98(0.95, 1.01) | 0.26   | 0.99(0.95, 1.03) | 0.56  | 0.56   |
| <b>ICU</b>                                    | 1.28(0.79, 2.09) | 0.32   | 1.67(0.95, 2.96) | 0.08  | 0.07   |
| <b>Married/Partner</b>                        | 0.93(0.78, 1.11) | 0.41   | 0.80(0.66, 0.98) | 0.036 | 0.035  |
| <b>Sex male</b>                               | 1.34(1.13, 1.58) | 0.001  | 1.39(1.15, 1.69) | 0.001 | <0.001 |
| <b>Emergency visit within 7 days post d/c</b> | 0.73(0.54, 0.98) | 0.038  | 0.75(0.54, 1.04) | 0.08  | 0.08   |
| <b>Discharge</b>                              |                  |        |                  |       | 0.028  |
| Home                                          | reference        |        | reference        |       |        |
| Home setting                                  | 0.62(0.51, 0.74) | <0.001 | 0.76(0.61, 0.95) | 0.015 |        |
| Another facility                              | 0.63(0.46, 0.86) | 0.004  | 0.71(0.48, 1.02) | 0.06  |        |
| <b>Campus</b>                                 | 1.18(1.00, 1.39) | 0.057  | 1.13(0.93, 1.37) | 0.21  | 0.21   |

Table 3: Analysis of covariates associated with topbox measure of “Recommend this hospital”. \*Elixscore log-transformed. Abbreviations: Elixscore – Elixhauser score, psi – patient safety indicator event, LOS – length of stay, ICU – intensive care unit stay



|                        | <b>Univariable Analysis</b> | <b>p</b> | <b>Multivariable Analysis</b> | <b>p</b> | <b>LR test (p)</b> |
|------------------------|-----------------------------|----------|-------------------------------|----------|--------------------|
| <b>Department</b>      |                             |          |                               |          | 0.81               |
| Surgery/ENT            | reference                   |          | reference                     |          |                    |
| Medicine               | 0.84(0.72, 0.98)            | 0.031    | 0.99(0.80, 1.22)              | 0.93     |                    |
| Family                 | 0.55(0.35, 0.87)            | 0.010    | 0.78(0.47, 1.31)              | 0.35     |                    |
| Obs/Gyn                | 1.07(0.70, 1.65)            | 0.75     | 1.08(0.67, 1.75)              | 0.74     |                    |
| <b>Physical Health</b> |                             |          |                               |          | <0.001             |
| Excellent              | reference                   |          | reference                     |          |                    |
| Very Good              | 0.66(0.48, 0.90)            | 0.009    | 0.73(0.52, 1.03)              | 0.08     |                    |
| Good                   | 0.43(0.32, 0.59)            | <0.001   | 0.51(0.36, 0.73)              | <0.001   |                    |
| Fair                   | 0.49(0.36, 0.68)            | <0.001   | 0.65(0.44, 0.96)              | 0.029    |                    |
| Poor                   | 0.48(0.32, 0.70)            | <0.001   | 0.71(0.44, 1.15)              | 0.109    |                    |
| <b>Mental Health</b>   |                             |          |                               |          | <0.001             |
| Excellent              | reference                   |          | reference                     |          |                    |
| Very Good              | 0.70(0.57, 0.86)            | 0.001    | 0.73(0.58, 0.93)              | 0.010    |                    |
| Good                   | 0.51(0.42, 0.64)            | <0.001   | 0.58(0.45, 0.76)              | <0.001   |                    |
| Fair                   | 0.47(0.36, 0.62)            | <0.001   | 0.52(0.37, 0.73)              | <0.001   |                    |
| Poor                   | 0.44(0.27, 0.72)            | 0.001    | 0.51(0.28, 0.92)              | 0.025    |                    |
| <b>Education</b>       |                             |          |                               |          | <0.001             |
| 8th Grade              | reference                   |          | reference                     |          |                    |
| Some High School       | 1.27(0.86, 1.90)            | 0.23     | 1.17(0.76, 1.79)              | 0.48     |                    |
| High School            | 0.99(0.70, 1.40)            | 0.95     | 0.90(0.61, 1.31)              | 0.57     |                    |
| College/CEGEP          | 0.73(0.52, 1.04)            | 0.08     | 0.61(0.42, 0.89)              | 0.011    |                    |
| Undergraduate          | 0.60(0.42, 0.86)            | 0.006    | 0.46(0.32, 0.72)              | <0.001   |                    |
| Post Graduate          | 0.64(0.45, 0.91)            | 0.014    | 0.49(0.31, 0.69)              | <0.001   |                    |
| <b>Race</b>            |                             |          |                               |          | 0.40               |
| White                  | reference                   |          | reference                     |          |                    |
| Black                  | 1.34(0.75, 2.40)            | 0.33     | 1.65(0.86, 3.19)              | 0.14     |                    |
| Arab                   | 0.90(0.49, 1.66)            | 0.74     | 0.93(0.49, 1.78)              | 0.83     |                    |
| First Nation           | 0.79(0.33, 1.92)            | 0.62     | 0.68(0.23, 1.97)              | 0.48     |                    |
| Oriental               | 0.94(0.57, 1.54)            | 0.80     | 1.28(0.75, 2.18)              | 0.37     |                    |
| Indian                 | 0.89(0.51, 1.54)            | 0.67     | 1.18(0.64, 2.17)              | 0.59     |                    |
| Other                  | 0.75(0.44, 1.29)            | 0.30     | 0.64(0.36, 1.16)              | 0.15     |                    |
| <b>Admit Urgent</b>    | 0.75(0.64, 0.88)            | <0.001   | 0.83(0.68, 1.02)              | 0.07     | 0.07               |
| <b>Sex Male</b>        | 1.26(1.08, 1.46)            | 0.003    | 1.31(1.11, 1.56)              | 0.002    | 0.002              |
| <b>Elixscore</b>       | 0.99(0.83, 1.18)            | 0.93     | 0.96(0.78, 1.19)              | 0.73     | 0.73               |
| <b>Age Group</b>       |                             |          |                               |          | 0.001              |
| 18-34                  | reference                   |          | reference                     |          |                    |
| 35-44                  | 1.40(0.88, 2.24)            | 0.16     | 1.54(0.93, 2.56)              | 0.10     |                    |
| 45-54                  | 1.87(1.24, 2.82)            | 0.003    | 2.20(1.41, 3.43)              | 0.001    |                    |

|                                               |                  |        |                  |        |        |
|-----------------------------------------------|------------------|--------|------------------|--------|--------|
| 55-64                                         | 2.07(1.42, 3.01) | <0.001 | 2.45(1.61, 3.73) | <0.001 |        |
| 65-79                                         | 1.88(1.31, 2.70) | 0.001  | 2.14(1.43, 3.21) | <0.001 |        |
| >79                                           | 1.57(1.07, 2.29) | 0.020  | 2.07(1.35, 3.19) | 0.001  |        |
| <b>Any psi</b>                                | 0.90(0.71, 1.14) | 0.39   | 0.94(0.70, 1.25) | 0.66   | 0.66   |
| <b>LOS &gt; 3 days</b>                        | 0.83(0.71, 0.96) | 0.013  | 0.96(0.79, 1.16) | 0.66   | 0.66   |
| <b>Income decile</b>                          | 0.97(0.94, 0.99) | 0.015  | 0.98(0.95, 1.02) | 0.31   | 0.31   |
| <b>ICU</b>                                    | 1.61(1.04, 2.50) | 0.034  | 1.97(1.20, 3.24) | 0.008  | 0.006  |
| <b>Married/Partner</b>                        | 1.00(0.85, 1.16) | 0.96   | 0.88(0.74, 1.06) | 0.18   | 0.18   |
| <b>Emergency visit within 7 days post d/c</b> | 0.74(0.56, 0.98) | 0.035  | 0.76(0.56, 1.03) | 0.08   | 0.08   |
| <b>Discharge</b>                              |                  |        |                  |        | 0.028  |
| Home                                          | reference        |        | reference        |        |        |
| Home setting                                  | 0.75(0.63, 0.89) | 0.001  | 0.79(0.64, 0.97) | 0.023  |        |
| Another facility                              | 0.67(0.50, 0.90) | 0.007  | 0.70(0.49, 0.99) | 0.041  |        |
| <b>Campus</b>                                 | 1.30(1.12, 1.51) | 0.001  | 1.34(1.13, 1.60) | 0.001  | <0.001 |

Table 4: Analysis of covariates associated with topbox measure of “Rate this hospital”. \*Elixscore log-transformed. Abbreviations: Elixscore – Elixhauser class, psi – patient safety indicator event, LOS – length of stay, ICU – intensive care unit stay

|                        | Univariable Analysis | <i>p</i> | Multivariable Analysis | <i>p</i> | LR test ( <i>p</i> ) |
|------------------------|----------------------|----------|------------------------|----------|----------------------|
| <b>Department</b>      |                      |          |                        |          | 0.19                 |
| Surgery/ENT            | reference            |          | reference              |          |                      |
| Medicine               | 0.06(0.50, 0.71)     | <0.001   | 0.82(0.65, 1.03)       | 0.09     |                      |
| Family                 | 0.37(0.23, 0.58)     | <0.001   | 0.64(0.38, 1.07)       | 0.09     |                      |
| Obs/Gyn                | 0.99(0.59, 1.64)     | 0.97     | 0.82(0.47, 1.44)       | 0.50     |                      |
| <b>Physical Health</b> |                      |          |                        |          | <0.001               |
| Excellent              | reference            |          | reference              |          |                      |
| Very Good              | 0.74(0.50, 1.11)     | 0.14     | 0.92(0.60, 1.42)       | 0.72     |                      |
| Good                   | 0.40(0.27, 0.58)     | <0.001   | 0.61(0.40, 0.93)       | 0.021    |                      |
| Fair                   | 0.33(0.22, 0.48)     | <0.001   | 0.59(0.37, 0.94)       | 0.026    |                      |
| Poor                   | 0.20(0.13, 0.31)     | <0.001   | 0.41(0.24, 0.70)       | 0.001    |                      |
| <b>Mental Health</b>   |                      |          |                        |          | <0.001               |
| Excellent              | reference            |          | reference              |          |                      |
| Very Good              | 0.64(0.49, 0.82)     | 0.001    | 0.71(0.53, 0.94)       | 0.017    |                      |
| Good                   | 0.39(0.30, 0.51)     | <0.001   | 0.53(0.39, 0.72)       | <0.001   |                      |
| Fair                   | 0.28(0.21, 0.38)     | <0.001   | 0.44(0.30, 0.64)       | <0.001   |                      |
| Poor                   | 0.21(0.13, 0.36)     | <0.001   | 0.43(0.22, 0.79)       | 0.008    |                      |
| <b>Education</b>       |                      |          |                        |          | 0.09                 |
| 8th Grade              | reference            |          | reference              |          |                      |
| Some High School       | 1.19(0.78, 1.82)     | 0.42     | 1.06(0.67, 1.68)       | 0.81     |                      |
| High School            | 1.06(0.73, 1.55)     | 0.74     | 0.87(0.58, 1.32)       | 0.51     |                      |
| College/CEGEP          | 1.14(0.78, 1.65)     | 0.51     | 0.82(0.54, 1.25)       | 0.35     |                      |
| Undergraduate          | 0.94(0.64, 1.39)     | 0.75     | 0.63(0.40, 0.97)       | 0.038    |                      |
| Post Graduate          | 1.20(0.82, 1.77)     | 0.35     | 0.79(0.51, 1.22)       | 0.29     |                      |
| <b>Race</b>            |                      |          |                        |          | 0.46                 |
| White                  | reference            |          | reference              |          |                      |
| Black                  | 1.39(0.69, 2.78)     | 0.36     | 1.76(0.80, 3.89)       | 0.16     |                      |
| Arab                   | 0.85(0.44, 1.67)     | 0.65     | 0.84(0.41, 1.69)       | 0.62     |                      |
| First Nation           | 0.93(0.33, 2.58)     | 0.88     | 0.93(0.28, 3.09)       | 0.90     |                      |
| Oriental               | 0.99(0.57, 1.73)     | 0.98     | 1.18(0.65, 2.14)       | 0.58     |                      |
| Indian                 | 0.72(0.40, 1.29)     | 0.27     | 1.00(0.52, 1.90)       | 0.99     |                      |
| Other                  | 0.61(0.35, 1.07)     | 0.08     | 0.58(0.31, 1.08)       | 0.09     |                      |
| <b>Admit Urgent</b>    | 0.57(0.47, 0.69)     | <0.001   | 0.84(0.67, 1.07)       | 0.16     | 0.16                 |
| <b>Sex Male</b>        | 1.08(0.91, 1.28)     | 0.37     | 1.02(0.84, 1.24)       | 0.84     | 0.84                 |
| <b>Elixscore</b>       | 0.81(0.66, 0.98)     | 0.032    | 1.07(0.85, 1.36)       | 0.55     | 0.55                 |
| <b>Age Group</b>       |                      |          |                        |          | 0.07                 |
| 18-34                  | reference            |          | reference              |          |                      |
| 35-44                  | 1.02(0.62, 1.70)     | 0.93     | 1.13(0.53, 1.96)       | 0.67     |                      |

|                                               |                  |        |                  |       |      |
|-----------------------------------------------|------------------|--------|------------------|-------|------|
| 45-54                                         | 1.66(1.05, 2.63) | 0.031  | 1.88(1.14, 3.09) | 0.014 |      |
| 55-64                                         | 1.50(0.99, 2.27) | 0.057  | 1.78(1.13, 2.82) | 0.014 |      |
| 65-79                                         | 1.35(0.91, 2.01) | 0.14   | 1.60(1.03, 2.48) | 0.036 |      |
| >79                                           | 0.93(0.61, 1.40) | 0.71   | 1.50(0.95, 2.39) | 0.09  |      |
| <b>Any psi</b>                                | 0.87(0.66, 1.13) | 0.29   | 1.15(0.84, 1.59) | 0.39  | 0.38 |
| <b>LOS &gt; 3 days</b>                        | 0.68(0.57, 0.80) | <0.001 | 0.89(0.72, 1.11) | 0.31  | 0.31 |
| <b>Income decile</b>                          | 0.99(0.96, 1.02) | 0.67   | 0.99(0.96, 1.03) | 0.64  | 0.64 |
| <b>ICU</b>                                    | 1.12(0.69, 1.79) | 0.65   | 1.30(0.76, 2.24) | 0.34  | 0.33 |
| <b>Married/Partner</b>                        | 1.04(0.88, 1.24) | 0.62   | 0.92(0.75, 1.13) | 0.43  | 0.43 |
| <b>Emergency visit within 7 days post d/c</b> | 0.73(0.54, 0.99) | 0.042  | 0.76(0.55, 1.06) | 0.11  | 0.12 |
| <b>Discharge</b>                              |                  |        |                  |       | 0.06 |
| Home                                          | reference        |        | reference        |       |      |
| Home setting                                  | 0.58(0.48, 0.70) | <0.001 | 0.82(0.65, 1.03) | 0.09  |      |
| Another facility                              | 0.47(0.35, 0.64) | <0.001 | 0.67(0.46, 0.97) | 0.032 |      |
| <b>Campus</b>                                 | 1.20(1.02, 1.42) | 0.032  | 1.19(0.98, 1.44) | 0.08  | 0.08 |

Table 5: Analysis of covariates associated with topbox measure of “Overall helped”. \*Elixscore log-transformed. Abbreviations: Elixscore – Elixhauser score, psi – patient safety indicator event, LOS – length of stay, ICU – intensive care unit stay

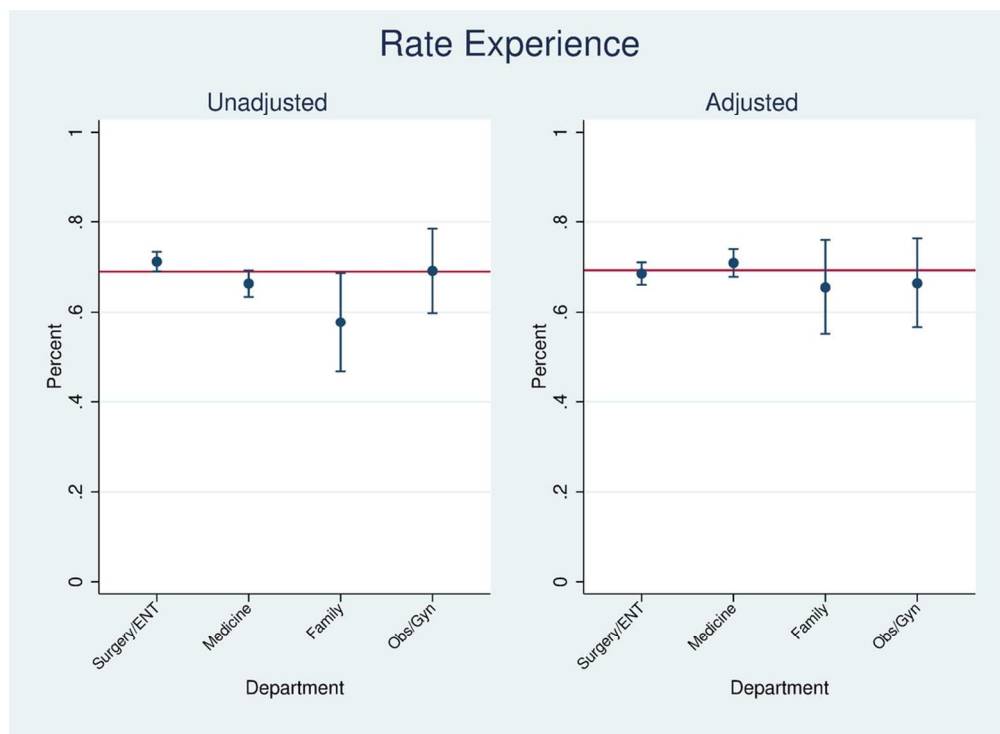

30  
31  
32  
33  
34  
35  
36  
37  
38  
39  
40  
41  
42  
43  
44  
45  
46  
47  
48  
49  
50  
51  
52  
53  
54  
55  
56  
57  
58  
59  
60

Figure 1: Unadjusted and adjusted predicted percent topbox of corporate indicator "Rate your experience" by hospital department. Error bars represent 95% CI. Difference between Surgery/ENT and Medicine significant ( $p=0.05$ ) in Unadjusted, however no differences between departments in Adjusted

101x73mm (300 x 300 DPI)

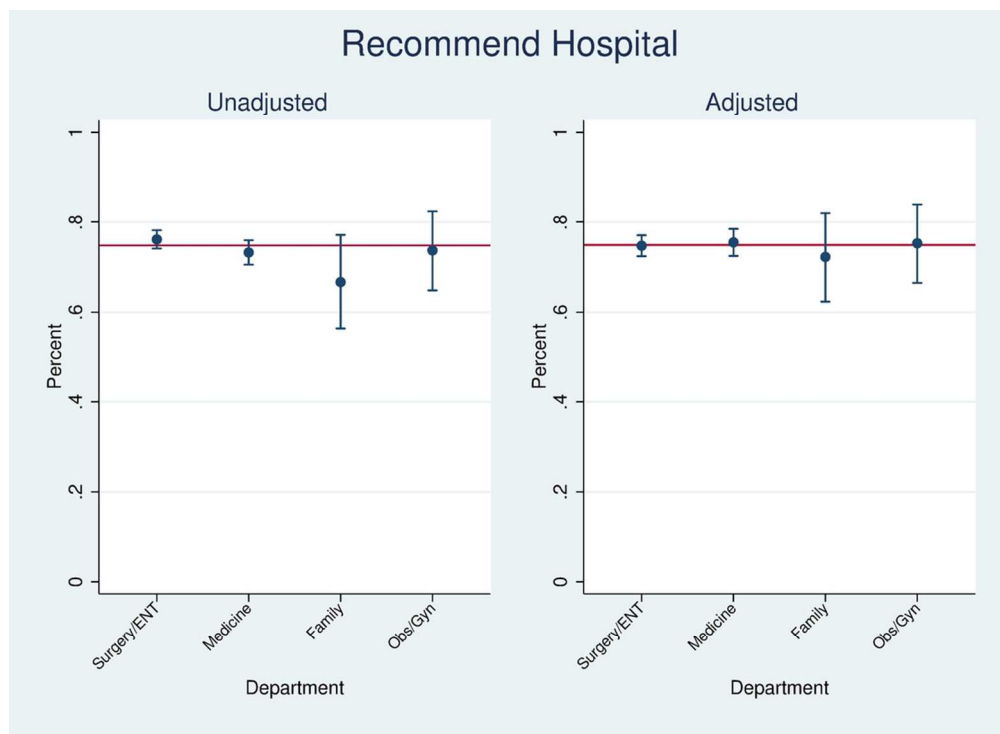

Figure 2: Unadjusted and adjusted predicted percent topbox of corporate indicator "Recommend this hospital" by hospital department. Error bars represent 95% CI. No statistically significant difference between groups.

101x73mm (300 x 300 DPI)

1  
2  
3  
4  
5  
6  
7  
8  
9  
10  
11  
12  
13  
14  
15  
16  
17  
18  
19  
20  
21  
22  
23  
24  
25  
26  
27  
28  
29  
30  
31  
32  
33  
34  
35  
36  
37  
38  
39  
40  
41  
42  
43  
44  
45  
46  
47  
48  
49  
50  
51  
52  
53  
54  
55  
56  
57  
58  
59  
60

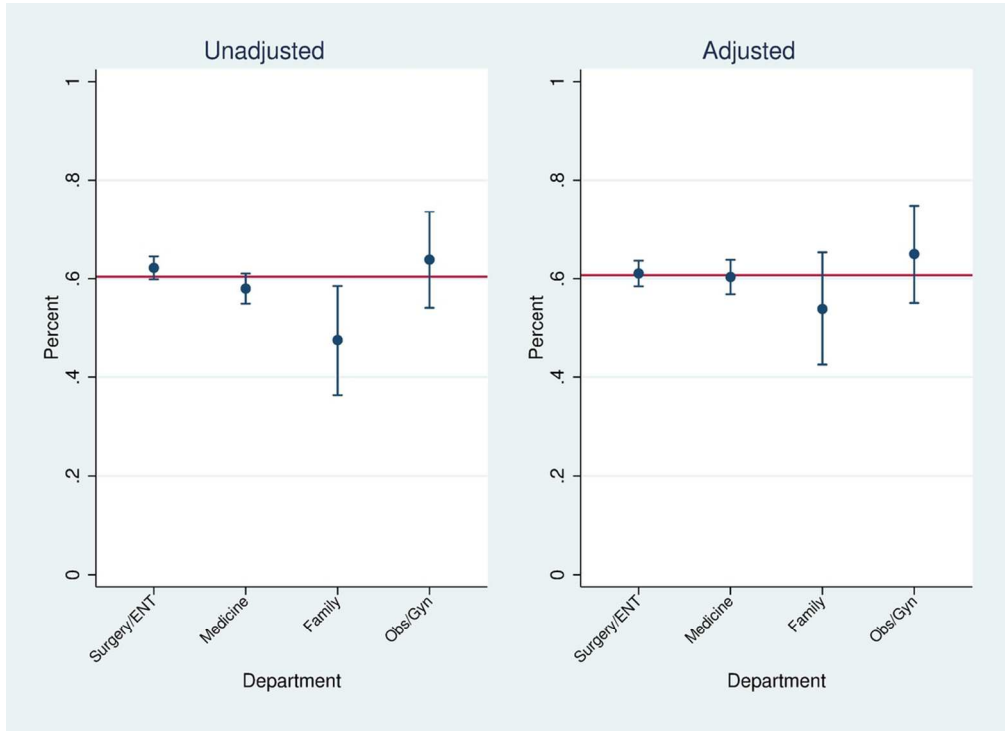

Figure 3: Unadjusted and adjusted predicted percent topbox of corporate indicator "Rate this hospital" by hospital department. Error bars represent 95% CI. Differences between Surgery/ENT and Family Medicine significant ( $p < 0.05$ ) in the unadjusted model but not in the adjusted model.

101x73mm (300 x 300 DPI)

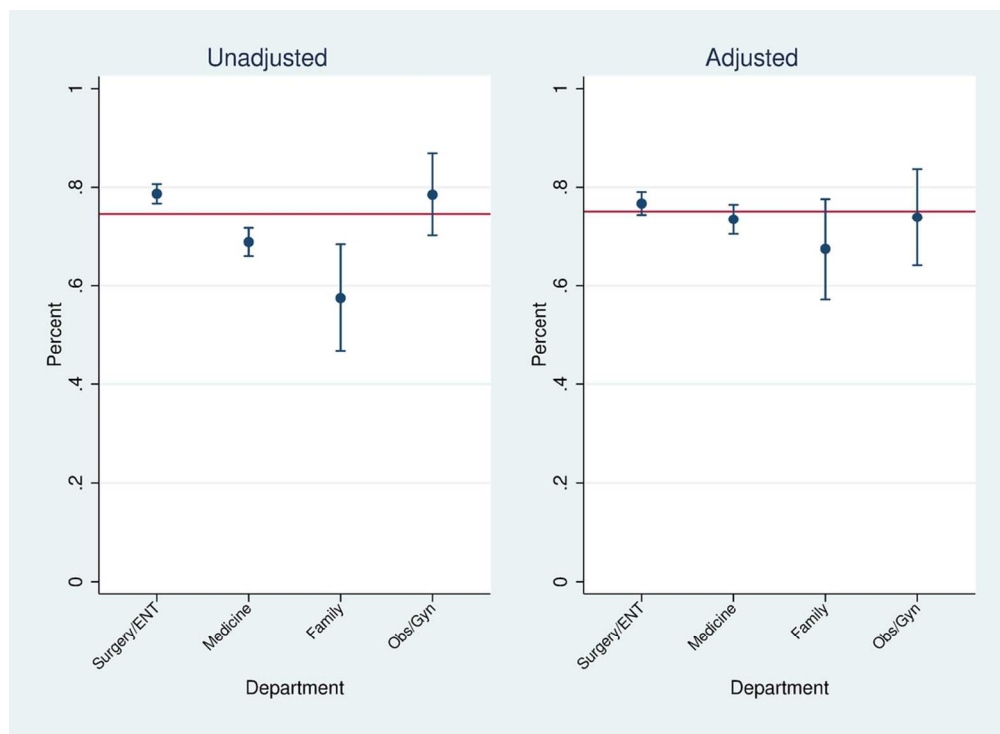

Figure 4: Unadjusted and adjusted predicted percent topbox of corporate indicator "Overall helped" by hospital department. Error bars represent 95% CI. In the unadjusted model, greater predicted measures were seen with surgery as compared to medicine and family medicine, and with obstetrics/gynecology as compared with family medicine ( $p < 0.05$ ). The differences were no longer significant in the adjusted model.

101x73mm (300 x 300 DPI)



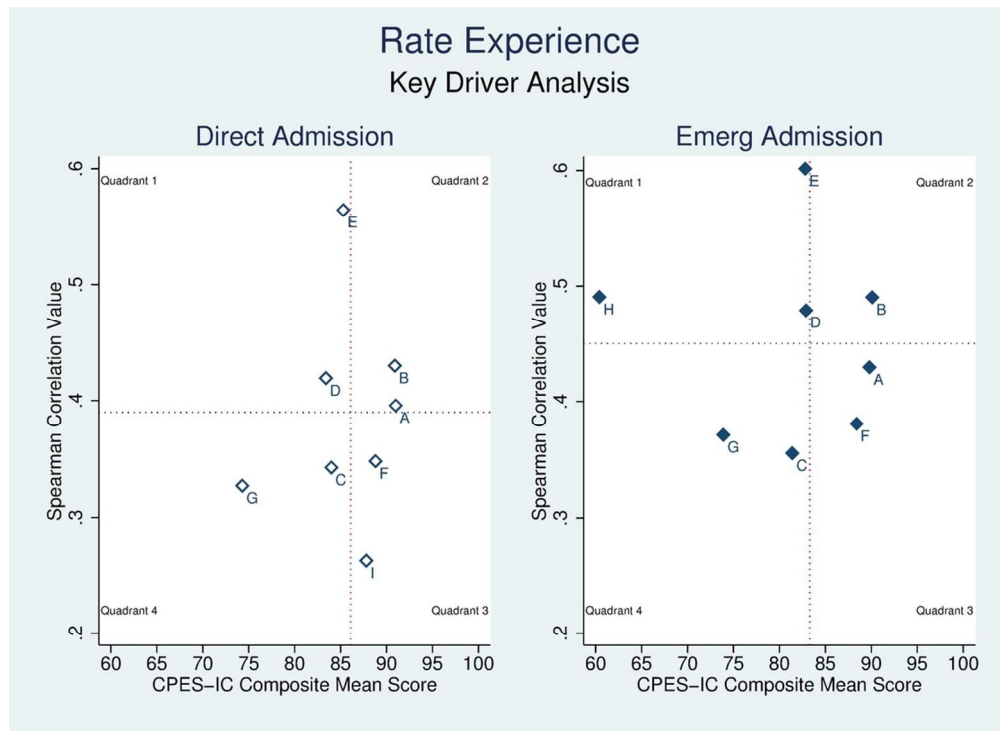

Figure 5: Key driver analysis: relationship domain composite measures to the global measure of Overall Experience, direct admission (left) and emergency admission(right). Horizontal black dotted line – mean for all correlation values. Vertical red dotted line – median for all composites. A- Communication doctors, B- Communication nurses, C- Responsiveness staff, D-Care transition, E-Person-centred care, F-Pain management, G-Communication medications, H – Admission processes emergency, I – Admission processes elective

101x73mm (300 x 300 DPI)

# Canadian Patient Experiences Survey—Inpatient Care

## Survey Instructions

- ◆ You should fill out this questionnaire only if you were the patient named on the envelope. You may need to get help from a family member or friend to answer the questions. That's okay.
- ◆ Answer all the questions by checking the box to the left of your answer.
- ◆ Your response to this survey is voluntary but will provide us with important information.
- ◆ You are sometimes told to skip over some questions in this survey. When this happens, you will see an arrow with a note that tells you what question to answer next, like this:

- Yes
- No → If No, go to Question 1

Placeholder for jurisdiction comments.

***Please answer the questions about your recent stay at the hospital named on the cover letter. Do not include any other hospital stays in your answers.***

### **YOUR CARE FROM NURSES**

**1. During this hospital stay, how often did nurses treat you with courtesy and respect?**

- Never
- Sometimes
- Usually
- Always

**2. During this hospital stay, how often did nurses listen carefully to you?**

- Never
- Sometimes
- Usually
- Always

**3. During this hospital stay, how often did nurses explain things in a way you could understand?**

- Never
- Sometimes
- Usually
- Always

**4. During this hospital stay, after you pressed the call button, how often did you get help as soon as you wanted it?**

- Never
- Sometimes
- Usually
- Always
- I never pressed the call button

## YOUR CARE FROM DOCTORS

5. During this hospital stay, how often did doctors treat you with courtesy and respect?

- Never  
 Sometimes  
 Usually  
 Always

6. During this hospital stay, how often did doctors listen carefully to you?

- Never  
 Sometimes  
 Usually  
 Always

7. During this hospital stay, how often did doctors explain things in a way you could understand?

- Never  
 Sometimes  
 Usually  
 Always

## THE HOSPITAL ENVIRONMENT

8. During this hospital stay, how often were your room and bathroom kept clean?

- Never  
 Sometimes  
 Usually  
 Always

9. During this hospital stay, how often was the area around your room quiet at night?

- Never  
 Sometimes  
 Usually  
 Always

## YOUR EXPERIENCES IN THIS HOSPITAL

10. During this hospital stay, did you need help from nurses or other hospital staff in getting to the bathroom or in using a bedpan?

- Yes  
 No → If No, go to Question 12

11. How often did you get help in getting to the bathroom or in using a bedpan as soon as you wanted?

- Never  
 Sometimes  
 Usually  
 Always

12. During this hospital stay, did you need medicine for pain?

- Yes  
 No → If No, go to Question 15

13. During this hospital stay, how often was your pain well controlled?

- Never  
 Sometimes  
 Usually  
 Always

14. During this hospital stay, how often did the hospital staff do everything they could to help you with your pain?

- Never  
 Sometimes  
 Usually  
 Always

1  
2  
3  
4  
5  
6  
7  
8  
9  
10  
11  
12  
13  
14  
15  
16  
17  
18  
19  
20  
21  
22  
23  
24  
25  
26  
27  
28  
29  
30  
31  
32  
33  
34  
35  
36  
37  
38  
39  
40  
41  
42  
43  
44  
45  
46  
47  
48  
49  
50  
51  
52  
53  
54  
55  
56  
57  
58  
59  
60

**15. During this hospital stay, were you given any medicine that you had not taken before?**

Yes

No → If No, go to Question 18

**16. Before giving you any new medicine, how often did hospital staff tell you what the medicine was for?**

Never

Sometimes

Usually

Always

**17. Before giving you any new medicine, how often did hospital staff describe possible side effects in a way you could understand?**

Never

Sometimes

Usually

Always

#### **WHEN YOU LEFT THE HOSPITAL**

**18. After you left the hospital, did you go directly to your own home, to someone else's home or to another health facility?**

Own home

Someone else's home

Another health

facility → **If Another health facility, go to Question 21**

**19. During this hospital stay, did doctors, nurses or other hospital staff talk with you about whether you would have the help you needed when you left the hospital?**

Yes

No

**20. During this hospital stay, did you get information in writing about what symptoms or health problems to look out for after you left the hospital?**

Yes

No

#### **OVERALL RATING OF HOSPITAL**

*Please answer the following questions about your stay at the hospital named on the cover letter. Do not include any other hospital stays in your answers.*

**21. Using any number from 0 to 10, where 0 is the worst hospital possible and 10 is the best hospital possible, what number would you use to rate this hospital during your stay?**

0 Worst hospital possible

1

2

3

4

5

6

7

8

9

10 Best hospital possible

1  
2  
3  
4  
5  
6  
7  
8  
9  
10  
11  
12  
13  
14  
15  
16  
17  
18  
19  
20  
21  
22  
23  
24  
25  
26  
27  
28  
29  
30  
31  
32  
33  
34  
35  
36  
37  
38  
39  
40  
41  
42  
43  
44  
45  
46  
47  
48  
49  
50  
51  
52  
53  
54  
55  
56  
57  
58  
59  
60

**22. Would you recommend this hospital to your friends and family?**

- Definitely no  
 Probably no  
 Probably yes  
 Definitely yes

*In this next section, we ask several more questions about your stay at the hospital.*

### **YOUR ARRIVAL AT THE HOSPITAL**

**23. When you arrived at the hospital, did you go to the emergency department?**

- Yes → If Yes, go to Question 26  
 No ↓ If No, please continue below

**24. Before coming to the hospital, did you have enough information about what was going to happen during the admission process?**

- Not at all  
 Partly  
 Quite a bit  
 Completely

**25. Was your admission into the hospital organized?**

- Not at all  
 Partly  
 Quite a bit  
 Completely

**Go to Question 30**

**Answer questions 26 to 29 only if you were admitted through the emergency department.**

**26. When you were in the emergency department, did you get enough information about your condition and treatment?**

- Not at all  
 Partly  
 Quite a bit  
 Completely

**27. Were you given enough information about what was going to happen during your admission to the hospital?**

- Not at all  
 Partly  
 Quite a bit  
 Completely

**28. After you knew that you needed to be admitted to a hospital bed, did you have to wait too long before getting there?**

- Yes  
 No

**29. Was your transfer from the emergency department into a hospital bed organized?**

- Not at all  
 Partly  
 Quite a bit  
 Completely

**Continue with Question 30**

## **DURING YOUR HOSPITAL STAY**

---

**30. Do you feel that there was good communication about your care between doctors, nurses and other hospital staff?**

- Never
- Sometimes
- Usually
- Always

**31. How often did doctors, nurses and other hospital staff seem informed and up-to-date about your hospital care?**

- Never
- Sometimes
- Usually
- Always

**32. How often were tests and procedures done when you were told they would be done?**

- Never
- Sometimes
- Usually
- Always
- I did not have any tests or procedures

**33. During this hospital stay, did you get all the information you needed about your condition and treatment?**

- Never
- Sometimes
- Usually
- Always

**34. Did you get the support you needed to help you with any anxieties, fears or worries you had during this hospital stay?**

- Never
- Sometimes
- Usually
- Always
- Not applicable

**35. Were you involved as much as you wanted to be in decisions about your care and treatment?**

- Never
- Sometimes
- Usually
- Always

**36. Were your family or friends involved as much as you wanted in decisions about your care and treatment?**

- Never
- Sometimes
- Usually
- Always
- I did not want them to be involved
- I did not have family or friends to be involved

## **LEAVING THE HOSPITAL**

---

**37. Before you left the hospital, did you have a clear understanding about all of your prescribed medications, including those you were taking before your hospital stay?**

- Not at all
- Partly
- Quite a bit
- Completely
- Not applicable

1  
2  
3  
4  
5  
6  
7  
8  
9  
10  
11  
12  
13

**38. Did you receive enough information from hospital staff about what to do if you were worried about your condition or treatment after you left the hospital?**

- Not at all  
 Partly  
 Quite a bit  
 Completely

14  
15  
16  
17  
18

**39. When you left the hospital, did you have a better understanding of your condition than when you entered?**

- Not at all  
 Partly  
 Quite a bit  
 Completely

19  
20  
21  
22  
23  
24  
25

### YOUR OVERALL RATINGS

26  
27  
28  
29  
30  
31  
32

**40. Overall, do you feel you were helped by your hospital stay? Please answer on a scale where 0 is “not helped at all” and 10 is “helped completely.”**

33  
34

**Overall . . . (Please circle a number)**



43  
44

**41. Overall . . . (Please circle a number)**

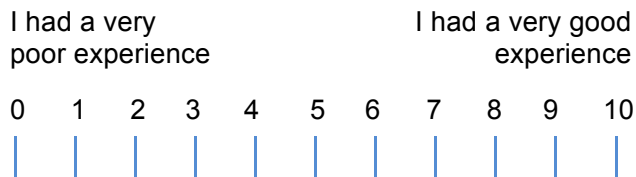

53  
54  
55  
56  
57  
58  
59  
60

### ABOUT YOU

**42. In general, how would you rate your overall physical health?**

- Excellent  
 Very good  
 Good  
 Fair  
 Poor

**43. In general, how would you rate your overall mental or emotional health?**

- Excellent  
 Very good  
 Good  
 Fair  
 Poor

**44. What is the highest grade or level of school that you have completed?**

- 8th grade or less  
 Some high school, but did not graduate  
 High school or high school equivalency certificate  
 College, CEGEP or other non-university certificate or diploma  
 Undergraduate degree or some university  
 Post-graduate degree or professional designation

**45. What is your gender?**

- Male  
 Female  
 Other

1  
2 **46. What is your year of birth?**

3 (Please write in; for example, "1934.")  
4  
5  
6  
7 \_\_\_\_\_

8 **47. Was your most recent stay at this**  
9 **hospital for a childbirth experience?**

10  Yes

11  No

12  
13  
14  
15 **48. The following question will help us to**  
16 **better understand the communities**  
17 **that we serve. Do you consider**  
18 **yourself to be . . .**

19 (Check all that apply)

20  White

21  Chinese

22  First Nation, Métis, Inuk or  
23 mixed (others may say Aboriginal  
24 or Indigenous)

25  South Asian (East Indian, Pakistani,  
26 Sri Lankan, etc.)

27  Black

28  Filipino

29  Latin American

30  Southeast Asian (Vietnamese,  
31 Cambodian, Malaysian, Laotian, etc.)

32  Arab

33  West Asian (Iranian, Afghan, etc.)

34  Korean

35  Japanese

36  Other

37  
38  
39  
40  
41  
42  
43  
44  
45  
46  
47  
48  
49 **49. Is there anything else you would like**  
to share about your hospital stay?

50  
51  
52  
53 \_\_\_\_\_  
54 *Questions 1 to 22 and 43 are adapted from the HCAHPS (Hospital Consumer Assessment of Healthcare*  
55 *Providers and Systems) questionnaire.*

56 *Questions 23 to 49 (excluding question 43) were adapted and/or developed by the Canadian Institute for Health*  
57 *Information in consultation with an interjurisdictional committee of experts.*



1  
2  
3 **Reporting Checklist for Submitted Manuscript: Impact of patient characteristics on**  
4 **the Canadian Patient Experiences Survey – Inpatient Care survey- analysis from an**  
5 **academic tertiary care centre**  
6 **Rubens FD et al.**  
7 **BMJ Open 2018**  
8  
9

10  
11 Based upon: Proposed Reporting Guidelines: Burns KE et al 2008. A guide for the design  
12 and conduct of self-administered surveys for clinicians. CMAJ 179;245-252  
13  
14  
15

| Paper Section | Question                                                                                     | Identified in Text                                                |
|---------------|----------------------------------------------------------------------------------------------|-------------------------------------------------------------------|
| Abstract      | Is the objective clearly stated?                                                             | Page 2                                                            |
|               | Is the design of the study stated?                                                           | Page 2                                                            |
|               | Is the study setting well-described?                                                         | Page 2                                                            |
|               | Is the survey population described?                                                          | Page 2                                                            |
|               | Is the response rate reported?                                                               | No – not available                                                |
|               | Are the outcome measures identified?                                                         | Page 2                                                            |
|               | Are the main results clearly reported?                                                       | Page 2                                                            |
|               | Are the conclusions appropriate?                                                             | Page 2                                                            |
| Introduction  | Is the problem clearly stated?                                                               | Pages 5-7                                                         |
|               | Is the pertinent literature cited and critically appraised?                                  | Pages 5-7                                                         |
|               | Is the relevance of the research question explained?                                         | Pages 5-7                                                         |
|               | Is the objective clearly stated?                                                             | Pages 7-8                                                         |
| Methods       | Is the study design appropriate to the objective?                                            | Pages 8-9                                                         |
|               | Is the setting clearly described?                                                            | Page 8                                                            |
|               | Are the methods described clearly enough to permit other researchers to duplicate the study? | Pages 8-10                                                        |
|               | Is the survey sample likely to be representative of the population?                          | Page 8                                                            |
|               | Is the questionnaire described adequately?                                                   | Appendix                                                          |
|               | Have the validity and reliability of the questionnaire been established?                     | Not applicable – survey developed elsewhere and validated by CIHI |
|               | Was the questionnaire administered in a satisfactory way?                                    | Page 8                                                            |
|               | Are the statistical methods used appropriately?                                              | Pages 9-10                                                        |
| Results       | Do the results address the objective?                                                        | Pages 10-12                                                       |
|               | Are all the respondents accounted for?                                                       | Pages 10-12                                                       |
|               | Are the results clearly and logically                                                        | Pages 10-12,                                                      |

|            |                                                             |                     |
|------------|-------------------------------------------------------------|---------------------|
|            | presented?                                                  | Figures 1-5, Tables |
|            | Are the tables and figures appropriate?                     | Figures 1-5, Tables |
|            | Are the numbers consistent in the text and the tables?      | Pages 10-12         |
| Discussion | Are the results succinctly summarized?                      | Page 12             |
|            | Are the implications of the results stated?                 | Pages 14-15         |
|            | Are other interpretations considered and refuted?           | Pages 15-16         |
|            | Are the limitations of the study and its results explained? | Pages 15-16         |
|            | Are appropriate conclusions drawn?                          | Page 16             |

STROBE Statement—checklist of items that should be included in reports of observational studies

| Item No.            | Recommendation                                                                                                                                                                                                                                                                                                                                                                                                                                                                                                                                                                                                                                                                                       | Page No. | Relevant text from manuscript |
|---------------------|------------------------------------------------------------------------------------------------------------------------------------------------------------------------------------------------------------------------------------------------------------------------------------------------------------------------------------------------------------------------------------------------------------------------------------------------------------------------------------------------------------------------------------------------------------------------------------------------------------------------------------------------------------------------------------------------------|----------|-------------------------------|
| 1                   | (a) Indicate the study's design with a commonly used term in the title or the abstract                                                                                                                                                                                                                                                                                                                                                                                                                                                                                                                                                                                                               | 1        | 1, nos 3-5                    |
|                     | (b) Provide in the abstract an informative and balanced summary of what was done and what was found                                                                                                                                                                                                                                                                                                                                                                                                                                                                                                                                                                                                  | 2        |                               |
| <b>Introduction</b> |                                                                                                                                                                                                                                                                                                                                                                                                                                                                                                                                                                                                                                                                                                      |          |                               |
| 2                   | Explain the scientific background and rationale for the investigation being reported                                                                                                                                                                                                                                                                                                                                                                                                                                                                                                                                                                                                                 | 5-7      |                               |
| 3                   | State specific objectives, including any prespecified hypotheses                                                                                                                                                                                                                                                                                                                                                                                                                                                                                                                                                                                                                                     | 7-8      | 48-55, 3-11                   |
| <b>Methods</b>      |                                                                                                                                                                                                                                                                                                                                                                                                                                                                                                                                                                                                                                                                                                      |          |                               |
| 4                   | Present key elements of study design early in the paper                                                                                                                                                                                                                                                                                                                                                                                                                                                                                                                                                                                                                                              | 8-10     |                               |
| 5                   | Describe the setting, locations, and relevant dates, including periods of recruitment, exposure, follow-up, and data collection                                                                                                                                                                                                                                                                                                                                                                                                                                                                                                                                                                      | 8        |                               |
| 6                   | (a) <i>Cohort study</i> —Give the eligibility criteria, and the sources and methods of selection of participants. Describe methods of follow-up<br><i>Case-control study</i> —Give the eligibility criteria, and the sources and methods of case ascertainment and control selection. Give the rationale for the choice of cases and controls<br><i>Cross-sectional study</i> —Give the eligibility criteria, and the sources and methods of selection of participants<br><br>(b) <i>Cohort study</i> —For matched studies, give matching criteria and number of exposed and unexposed<br><i>Case-control study</i> —For matched studies, give matching criteria and the number of controls per case | 8        |                               |
| 7                   | Clearly define all outcomes, exposures, predictors, potential confounders, and effect modifiers. Give diagnostic criteria, if applicable                                                                                                                                                                                                                                                                                                                                                                                                                                                                                                                                                             | 8-10     |                               |
| 8*                  | For each variable of interest, give sources of data and details of methods of assessment (measurement). Describe comparability of assessment methods if there is more than one group                                                                                                                                                                                                                                                                                                                                                                                                                                                                                                                 | 8-10     |                               |
| 9                   | Describe any efforts to address potential sources of bias                                                                                                                                                                                                                                                                                                                                                                                                                                                                                                                                                                                                                                            | 10       |                               |
| 10                  | Explain how the study size was arrived at                                                                                                                                                                                                                                                                                                                                                                                                                                                                                                                                                                                                                                                            | N/A      |                               |

Continued on next page

1  
2  
3  
4  
5  
6  
7  
8  
9  
10  
11  
12  
13  
14  
15  
16  
17  
18  
19  
20  
21  
22  
23  
24  
25  
26  
27  
28  
29  
30  
31  
32  
33  
34  
35  
36  
37  
38  
39  
40  
41  
42  
43  
44  
45  
46  
47  
48  
49  
50  
51  
52  
53  
54  
55  
56  
57  
58  
59  
60



|                        |     |                                                                                                                                                                                                              |                   |
|------------------------|-----|--------------------------------------------------------------------------------------------------------------------------------------------------------------------------------------------------------------|-------------------|
| Quantitative variables | 11  | Explain how quantitative variables were handled in the analyses. If applicable, describe which groupings were chosen and why                                                                                 | 8-10              |
| Statistical methods    | 12  | (a) Describe all statistical methods, including those used to control for confounding                                                                                                                        | 10                |
|                        |     | (b) Describe any methods used to examine subgroups and interactions                                                                                                                                          | 10                |
|                        |     | (c) Explain how missing data were addressed                                                                                                                                                                  | 10                |
|                        |     | (d) <i>Cohort study</i> —If applicable, explain how loss to follow-up was addressed                                                                                                                          |                   |
|                        |     | <i>Case-control study</i> —If applicable, explain how matching of cases and controls was addressed                                                                                                           |                   |
|                        |     | <i>Cross-sectional study</i> —If applicable, describe analytical methods taking account of sampling strategy                                                                                                 | N/A               |
|                        |     | (e) Describe any sensitivity analyses                                                                                                                                                                        | N/A               |
| <b>Results</b>         |     |                                                                                                                                                                                                              |                   |
| Participants           | 13* | (a) Report numbers of individuals at each stage of study—eg numbers potentially eligible, examined for eligibility, confirmed eligible, included in the study, completing follow-up, and analysed            | 10                |
|                        |     | (b) Give reasons for non-participation at each stage                                                                                                                                                         | N/A               |
|                        |     | (c) Consider use of a flow diagram                                                                                                                                                                           | N/A               |
| Descriptive data       | 14* | (a) Give characteristics of study participants (eg demographic, clinical, social) and information on exposures and potential confounders                                                                     | Table 1           |
|                        |     | (b) Indicate number of participants with missing data for each variable of interest                                                                                                                          | 10                |
|                        |     | (c) <i>Cohort study</i> —Summarise follow-up time (eg, average and total amount)                                                                                                                             | <del>10</del>     |
| Outcome data           | 15* | <i>Cohort study</i> —Report numbers of outcome events or summary measures over time                                                                                                                          |                   |
|                        |     | <i>Case-control study</i> —Report numbers in each exposure category, or summary measures of exposure                                                                                                         | 10-12, tables 2-5 |
|                        |     | <i>Cross-sectional study</i> —Report numbers of outcome events or summary measures                                                                                                                           |                   |
| Main results           | 16  | (a) Give unadjusted estimates and, if applicable, confounder-adjusted estimates and their precision (eg, 95% confidence interval). Make clear which confounders were adjusted for and why they were included | Tables 2-5        |
|                        |     | (b) Report category boundaries when continuous variables were categorized                                                                                                                                    | 10                |
|                        |     | (c) If relevant, consider translating estimates of relative risk into absolute risk for a meaningful time period                                                                                             | N/A               |

Continued on next page

Other analyses 17 Report other analyses done—eg analyses of subgroups and interactions, and sensitivity analyses

12

**Discussion**

Key results 18 Summarise key results with reference to study objectives

12-13

Limitations 19 Discuss limitations of the study, taking into account sources of potential bias or imprecision. Discuss both direction and magnitude of any potential bias

16

Interpretation 20 Give a cautious overall interpretation of results considering objectives, limitations, multiplicity of analyses, results from similar studies, and other relevant evidence

12-17

Generalisability 21 Discuss the generalisability (external validity) of the study results

12-17

**Other information**

Funding 22 Give the source of funding and the role of the funders for the present study and, if applicable, for the original study on which the present article is based

No funding source indicated on the

\*Give information separately for cases and controls in case-control studies and, if applicable, for exposed and unexposed groups in cohort and cross-sectional studies.

**Note:** An Explanation and Elaboration article discusses each checklist item and gives methodological background and published examples of transparent reporting. The STROBE checklist is best used in conjunction with this article (freely available on the Web sites of PLoS Medicine at <http://www.plosmedicine.org/>, Annals of Internal Medicine at <http://www.annals.org/>, and Epidemiology at <http://www.epidem.com/>). Information on the STROBE Initiative is available at [www.strobe-statement.org](http://www.strobe-statement.org).

1  
2  
3  
4  
5  
6  
7  
8  
9  
10  
11  
12  
13  
14  
15  
16  
17  
18  
19  
20  
21  
22  
23  
24  
25  
26  
27  
28  
29  
30  
31  
32  
33  
34  
35  
36  
37  
38  
39  
40  
41  
42  
43  
44  
45  
46  
47  
48  
49  
50  
51  
52  
53  
54  
55  
56  
57  
58  
59  
60

# BMJ Open

## Impact of patient characteristics on the Canadian Patient Experiences Survey – Inpatient Care survey- analysis from an academic tertiary care centre

|                                 |                                                                                                                                                                                                                                                                                                                              |
|---------------------------------|------------------------------------------------------------------------------------------------------------------------------------------------------------------------------------------------------------------------------------------------------------------------------------------------------------------------------|
| Journal:                        | <i>BMJ Open</i>                                                                                                                                                                                                                                                                                                              |
| Manuscript ID                   | bmjopen-2018-021575.R2                                                                                                                                                                                                                                                                                                       |
| Article Type:                   | Research                                                                                                                                                                                                                                                                                                                     |
| Date Submitted by the Author:   | 26-Jun-2018                                                                                                                                                                                                                                                                                                                  |
| Complete List of Authors:       | Rubens, F; University of Ottawa Heart Institute, Surgery<br>Rothwell, Diana; Ottawa Hospital Research Institute<br>Al Zayadi, Amal; Ottawa Hospital Research Institute<br>Sundaresan, Sudhir; The Ottawa Hospital<br>Ramsay, Tim; The Ottawa Health Research Institute,<br>Forster, Alan; Ottawa Hospital Research Institute |
| <b>Primary Subject Heading</b>: | Patient-centred medicine                                                                                                                                                                                                                                                                                                     |
| Secondary Subject Heading:      | Communication, Health policy, Patient-centred medicine                                                                                                                                                                                                                                                                       |
| Keywords:                       | HEALTH SERVICES ADMINISTRATION & MANAGEMENT, Patient Experience, Organisation of health services < HEALTH SERVICES ADMINISTRATION & MANAGEMENT, Patient experience                                                                                                                                                           |
|                                 |                                                                                                                                                                                                                                                                                                                              |

SCHOLARONE™  
Manuscripts

Only

1  
2  
3 Impact of patient characteristics on the Canadian Patient Experiences Survey – Inpatient  
4  
5 Care survey- analysis from an academic tertiary care centre  
6  
7  
8  
9

10 Rubens FD<sup>1</sup>, Rothwell DM<sup>2</sup>, Al Zayadi A<sup>2</sup>, Sundaresan S<sup>1</sup>, Ramsay T<sup>2</sup>, Forster A<sup>2,3</sup>

11  
12 1- Department of Surgery, University of Ottawa

13  
14 2- Clinical Epidemiology, Ottawa Hospital Research Institute

15  
16 3- Department of Medicine, University of Ottawa  
17  
18  
19  
20

21 Corresponding author:

22 Fraser Rubens MD MSc FACS FRCSC

23  
24 Professor of Surgery

25  
26 Division of Cardiac Surgery

27  
28 University of Ottawa Heart Institute

29  
30 40 Ruskin St.

31  
32 Ottawa, Ontario

33  
34 Canada

35  
36 K1Y 4W7

37  
38 Fax: 613 696 7303

39  
40 [frubens@ottawaheart.ca](mailto:frubens@ottawaheart.ca)  
41  
42  
43  
44  
45  
46  
47  
48

49 Total word count (figures): 5967

50  
51 Abstract word count: 245

52  
53 Running title: Patient experience covariates  
54  
55  
56  
57  
58  
59  
60



**Abstract:**

Objective: To determine the role of patient demographics, care domains and self-perceived health status in the analysis and interpretation of results from the Canadian Patient Experience Survey-Inpatient Care (CPES-IC).

Design: Cross-sectional survey

Setting: Single large Canadian two campus tertiary care academic centre

Participants: Random sampling of hospital patients post-discharge

Intervention and Main Outcome Measures: Logistic regression models were developed to analyze topbox scoring on four questions of global care (rate experience, recommend hospital, rate hospital, overall helped). Means of each composite domain were correlated to the four overall scores at the patient level to determine Spearman's rank correlation coefficients which were plotted against the overall (hospital) domain score for the key driver analysis.

Results: Topbox scoring was decreased with worse degrees of perceived physical and mental health in all four global questions ( $p < 0.05$ ). Female gender and higher levels of education were associated with worse scoring on rate experience, recommend hospital and rate hospital ( $p < 0.001$ ). Whereas there was a significant difference between hospital departments in unadjusted measures, these differences were no longer evident after adjustment with patient covariates. Key driver analysis identified person-centred care, care transition and the domain related to emergency admission as areas of highest potential for improvement.

Conclusions: Global measures of overall care are influenced by patient-perceived physical and mental health. Caution should be exercised in using patient-satisfaction surveys to compare performance between different health-care provision entities, as



1  
2  
3  
4  
5  
6  
7  
8  
9  
10  
11  
12  
13  
14  
15  
16  
17  
18  
19  
20  
21  
22  
23  
24  
25  
26  
27  
28  
29  
30  
31  
32  
33  
34  
35  
36  
37  
38  
39  
40  
41  
42  
43  
44  
45  
46  
47  
48  
49  
50  
51  
52  
53  
54  
55  
56  
57  
58  
59  
60

apparent differences could be explained by variation in patient mix rather than variation in performance.

For peer review only

1  
2  
3 Strengths and Limitations of Study:  
4

- 5 1) This study involves the novel linkage of a clinical database to individual survey  
6 results to allow the accurate analysis of the role of patient characteristics and  
7 demographics on survey response.  
8  
9  
10  
11  
12 2) The study provides a validated process by which covariates could be used to  
13 adjust patient experience survey outcomes to facilitate inter-unit and inter-  
14 institution comparisons.  
15  
16  
17  
18  
19 3) The analysis has been completed on data from a single institution and thus the  
20 generalizability is not known.  
21  
22  
23  
24 4) This study is limited by survey non-responders as well as the random nature of  
25 survey participants amongst the total discharge population from the hospital.  
26  
27  
28  
29  
30  
31  
32  
33  
34  
35  
36  
37  
38  
39  
40  
41  
42  
43  
44  
45  
46  
47  
48  
49  
50  
51  
52  
53  
54  
55  
56  
57  
58  
59  
60

## Introduction

Patient experience is now recognized as a critical component of modern health care delivery<sup>1</sup>. Aside from the clear rationale to routinely provide compassionate care, there exists a strong ethical basis for physicians to support excellence in this area as it is of vital interest to patients and governments as a foundation of patient-centred medicine<sup>2</sup>.

There is also supportive evidence that improved patient experience may positively impact outcomes<sup>1 3</sup> particularly through better compliance to evidence-based guidelines, such as in areas of chronic disease management<sup>4</sup>.

There are many different processes by which inpatient patient experience has been measured internationally<sup>5-8</sup>. In the United States, it is measured using the Hospital Consumer Assessment of Health-Care Provider Systems (HCAHPS) survey<sup>9</sup>. Hospital funding from Medicare is partially dependent on the results from this survey and thus health care organizations are deeply committed to improving results. A modification of the HCAHPS survey (Canadian Patient Experience Survey – Inpatient Care, CPES-IC) was developed through collaboration between the Canadian Institute for Health information (CIHI), Accreditation Canada, the Canadian Patient Safety Institute, the Change Foundation and the Inter-Jurisdictional Patient Experience Group and this survey is now routinely administered in four provinces in Canada<sup>10</sup>.

Though the HCAHPS and the CPES-IC are very similar, there are subtle differences that reflect the unique nature of the single-payer system in Canada. The CPES-IC survey consists of 22 questions derived from the HCAHPS as well as other questions that “address key areas relevant to the Canadian context”. The questions can be classified in

1  
2  
3 three specific groups. In the first group, individual questions can be clustered as they  
4 reflect care in particular domains such as doctor communication skills (3 questions) and  
5 nursing communication skills (3 questions) amongst others. The Canadian survey  
6 includes the same domains as the HCAHPS, but also comprises several questions that  
7 constitute new domains not addressed in the HCAHPS survey such as admission  
8 experience, person-centred care, discharge and transition. Further details regarding  
9 differences between the Canadian and American surveys are available on the CIHI web-  
10 site (<https://www.cihi.ca/en/patient-experience>).

11  
12 The composite questions for each domain can be averaged to provide a mean value which  
13 is currently reported at the hospital level for the HCAHPS survey<sup>11</sup>. In the second group  
14 there are four questions that reflect overall care that are of particular importance at the  
15 institutional level to assess the quality of patient experience. One of these questions is  
16 also used as a corporate measure of key interest (“Rate your experience?”) and it is most  
17 commonly used to rank hospitals nationally after adjustment for regional differences<sup>3</sup>.

18  
19 Results from the three other questions related to overall care include; “Would you  
20 recommend this hospital to your friends and family?” (recommend hospital) and “Using  
21 any number from 0 to 10, where 0 is the worst hospital possible and 10 is the best  
22 hospital possible, what number would you use to rate this hospital during your stay?”  
23 (rate hospital) and “Overall, do you feel you were helped by your hospital stay?” (overall  
24 helped). Success in these and other questions are measured by the percent of “topbox”  
25 designation by the patients in which they have ranked a 4 on the recommend hospital  
26 question (on a scale of 1 to 4) or 9 or 10 out of an ordinal scale of 10 for the remaining  
27  
28  
29  
30  
31  
32  
33  
34  
35  
36  
37  
38  
39  
40  
41  
42  
43  
44  
45  
46  
47  
48  
49  
50  
51  
52  
53  
54  
55  
56  
57  
58  
59  
60

1  
2  
3 three questions. The “topbox” metric has been validated and accepted as a marker of  
4  
5 excellence in patient experience measurement.<sup>12</sup>  
6

7  
8 The final group of questions found in both surveys consists of inquiries regarding patient-  
9  
10 perceived health status as well as demographic topics such as race and education. These  
11  
12 questions are referred to a Patient Mix Adjusters (PMA) and they are used in the  
13  
14 HCAHPS survey in order to provide risk adjustment, particularly when comparing  
15  
16 between geographic regions. The PMA questions for the HCAHPS are re-assessed  
17  
18 quarterly by the Centre for Medicare and Medicaid (CMS) after reviewing national  
19  
20 results.  
21  
22

23  
24 There is limited familiarity in the assessment of patient experience in Canada and the use  
25  
26 of such surveys. Although it has been demonstrated that patient sociodemographic factors  
27  
28 such as age, ethnicity, sex and socioeconomic class have been shown to influence patient  
29  
30 experience responses<sup>13</sup>, there is also no understanding of the validity of the PMA  
31  
32 questions in adjusting the results of the CPES-IC survey and how they may contribute to  
33  
34 credibly compare units or departments within a hospital. In summary, it is not clear how  
35  
36 patient factors such as self-described characteristics including perception of mental and  
37  
38 physical health, patient demographics and co-morbidities impact the results of the  
39  
40 Canadian survey on in-hospital patient experience.  
41  
42  
43  
44  
45  
46

47  
48 The overall objective of this research was to compare the value of the self-described  
49  
50 patient characteristics obtained from the survey with covariates obtained from a hospital  
51  
52 database, in the development of a statistical model to predict topbox scoring in the four  
53  
54 survey questions related to overall care; a) rate your experience b) recommend hospital c)  
55  
56  
57  
58  
59  
60

1  
2  
3 rate hospital d) overall helped. We also sought to assess how the PMA questions and  
4  
5 other data from the hospital database influence patient experience at the hospital and  
6  
7 departmental level and to determine how the composite domain measurements influence  
8  
9 the four adjusted global measurements.  
10  
11  
12  
13

## 14 **Methods**

15  
16 This analysis was conducted as a Quality Assurance project. The protocol was reviewed  
17  
18 by the Ottawa Health Science Network – Research Ethics Board and individual patient  
19  
20 consent was waived. Data was collected from April 1, 2016 to Nov 30, 2016 from the  
21  
22 CPES-IC Survey (see appendix 1) administered by National Research Corporation (NRC,  
23  
24 Markham, Ontario). Surveys were distributed in both official languages.  
25  
26  
27  
28  
29

### 30 Patient and Public Involvement

31  
32 There was no patient or public involvement in this research in terms of development,  
33  
34 design or analysis.  
35  
36  
37  
38  
39

40 The data was merged with administrative data collected from The Ottawa Hospital Data  
41  
42 Warehouse (TOHDW) which is a relational database that contains administrative and  
43  
44 clinical data for all patients seen at The Ottawa Hospital. Deciles of income class were  
45  
46 derived using the Postal Code Conversion File Version 6.6 based on data from August  
47  
48 2015 (Statistics Canada). The Elixhauser class was derived using a modification of the  
49  
50 Elixhauser comorbidity measure after applying the latter to the hospital data (ref van  
51  
52 Walraven Med Care 2009). The occurrence of a patient safety indicator (psi) event (i.e.  
53  
54  
55  
56  
57  
58  
59  
60

1  
2  
3 an in-hospital adverse event) was determined using ICD-10 coding from administrative  
4 data <sup>14</sup>.

5  
6  
7  
8 The Ottawa Hospital is a large academic tertiary care teaching centre with two inpatient  
9  
10 campuses. There are 6 admitting departments (Surgery/ENT, Medicine, Obstetrics-  
11 Gynecology, Family Medicine, Ophthalmology and Psychiatry). A different survey was  
12 used in Psychiatry and Obstetrics thus these patients were excluded. Ophthalmology was  
13 excluded as it is primarily an outpatient service and accounts for less than 1% of  
14 admissions. Data from one surgical (cardiac surgery) and one medical division  
15 (cardiology) was not available as administrative data was not linkable to the patient  
16 experience data from NRC due to a differing collection and analysis process. Patients  
17 who died prior to discharge were excluded from analysis.

18  
19 Composite domains were identified as follows: communication with doctors (questions 5-  
20 7), communication with nurses (questions 1-3), responsiveness of staff (questions 4, 11),  
21 communication of medications (questions 16, 17), transition of care (37-39), person-  
22 centred care (30-36), direct admission (questions 24, 25) and emergency admission (26-  
23 29). The mean was calculated for each patient for each domain as long as more than 50%  
24 of the questions in the domain were reported<sup>15</sup>. Spearman's rank correlation coefficients  
25 were determined for the continuous value of each domain and the ordinal global question  
26 score and this was plotted against the overall (hospital) domain score for the key driver  
27 analysis<sup>16</sup>. The median value of the domain scores was used for the vertical separation of  
28 the quadrants due to skewness. Points identified in quadrant 1 represent domains with  
29 increased potential for improvement due to high correlation with a global score and lower  
30 mean value.

## Statistical Analyses:

Patient characteristics across department groups were compared using a chi square test.

Distribution normality of covariates was tested using the Shapiro-Wilk test.

For categorical variables with equal variances, oneway analysis of variance was used to compare departments, whereas Kruskal-Wallis equality of populations rank test was used for categorical groups with unequal variances.

Multivariable logistic models were developed to test the primary outcomes from the overall care questions (a) rate experience b) recommend hospital c) rate hospital d) overall helped) reported as dichotomous outcomes representing “topbox” response (9 or 10) or no topbox (<9). The association of each covariate was assessed using likelihood ratio tests by testing the model with and without the variable. Marginal means were determined for each department using the derived model with all of the covariates, as well as with no covariates (unadjusted). In order to compare departments, a Bonferroni correction was used for multiple pairwise comparisons. A p value of < 0.05 was considered significant. Analyses were completed using STATA™ vers. 14.2 (College Station, Tx).

## Results

### Patient Characteristics

There were 2989 patients who responded to the survey representing hospital admissions under the care of 295 physicians (146 medicine, 110 surgery/ENT, 22 family, 17 obstetrics/gynecology.). The institution consists of 918 in-hospital beds geographically



1  
2  
3 situated at 2 campuses. Characteristics of the patients from the total group and from each  
4 department are presented in Table 1. There were significant differences between the  
5 department groups in terms of physical and mental health, Elixhauser class, admission  
6 status, length of stay, age, discharge disposition, marital status and sex.  
7  
8  
9

### 12 Topbox Analysis – Overall Measures

14 The results of the multivariable analyses in the derivation of the model for the overall  
15 measures (rate experience, recommend hospital, rate hospital and overall helped) are  
16 presented in Tables 2-5. Decrease in topbox scoring was associated with worse degrees of  
17 perceived physical and mental health in all four of the questions. There was a significant  
18 relationship with age group in all questions with lowest odds ratios in patients between  
19 the ages of 18-34 years. On pairwise comparison the predicted scores in this group were  
20 significantly lower than those in the age groups of 55-64 years and 65-79 years ( $p<0.05$ ).  
21 Increased level of education and female sex were associated with worse scoring in rate  
22 experience, recommend hospital and rate hospital questions. Covariates from the  
23 institutional database that were significant contributors to the models included discharge  
24 disposition to a facility (recommend and rate hospital), marital status (recommend  
25 hospital) and ICU stay (rate hospital). Campus site was found to be a factor in rate  
26 hospital ( $p<0.05$ ).  
27  
28  
29  
30  
31  
32  
33  
34  
35  
36  
37  
38  
39  
40  
41  
42  
43

44 Adjusted and unadjusted department-based predicted measures for rate experience, and  
45 recommend hospital are presented in Figures 1 and 2. Unadjusted pairwise comparison  
46 of rate experience demonstrated a greater likelihood of topbox scoring with surgery as  
47 compared to medicine however this was not significant ( $p=0.054$ ). This difference was  
48 not seen after adjustment ( $p=0.911$ ). Unadjusted pairwise comparison of the question rate  
49  
50  
51  
52  
53  
54  
55  
56  
57  
58  
59  
60

1  
2  
3 hospital demonstrated a significant increase in surgery as compared to family medicine,  
4  
5 however this difference was not present in the adjusted model (data not shown).  
6

7  
8 Unadjusted analysis of the overall helped question demonstrated greater likelihood of  
9  
10 topbox scoring in surgery as compared to medicine and family medicine, as well as  
11  
12 obstetrics gynecology as compared to family medicine ( $p < 0.05$ ) however these  
13  
14 comparisons were no longer significant after adjustment for the covariates in the model  
15  
16 (data not shown).  
17

### 18 19 Key Driver Analysis 20

21 Key driver analysis of the global question of rate experience is presented in figure 3.

22  
23 Common domains present in quadrant 1 in all four questions include person-centred care,  
24  
25 care transition and the domain related to emergency admission processes. Similar patterns  
26  
27 were seen with the other three global questions (results not shown).  
28  
29  
30  
31  
32

### 33 Discussion 34

35 Results from the CPES-IC survey administered to patients discharged from a large  
36  
37 Canadian multi-campus health institution were analyzed after merging with a  
38  
39 comprehensive administrative database. Two patient-answered demographic questions  
40  
41 collected from the survey (patient-perceived overall physical and mental health) were  
42  
43 significant covariates predicting topbox recognition in all four of the overall care  
44  
45 questions. Increasing level of education and female sex were associated with decreased  
46  
47 topbox scoring in rate experience, recommend hospital and rate hospital. Discharge to a  
48  
49 non-home environment was associated with lower topbox scoring on recommend and rate  
50  
51 hospital. The only significant contributors to the models from the hospital database  
52  
53  
54  
55  
56  
57  
58  
59  
60

1  
2  
3 included marital status (recommend hospital), and ICU stay (rate hospital). Economic  
4 status, in-hospital adverse events and Elixhauser co-morbidity class did not significantly  
5 contribute to the models for the four questions related to overall care. After adjustment,  
6 there was no significant difference in the predicted measures between the four major  
7 departments in any of the four questions that related to the overall patient experience.  
8  
9 Finally, key driver analysis using these models, confirmed that the greatest yield for  
10 interventions at the hospital level include efforts to improve person-centred care, care  
11 transition and the experience for those being admitted through the emergency department.  
12  
13 Patient experience has become a focus of the health care evolution and it has been  
14 recognized as a key interest to consumers and patient advocacy groups. The Institute of  
15 Healthcare Improvement (IHI) a leader in the transformation of the health care system,  
16 has advocated the goal of improving the experience of care within its triple aim of quality  
17  
18 <sup>17</sup>. The Affordable Care Act in collaboration with the Centers for Medicare and Medicaid  
19 Services (CMS) <sup>12</sup> has emphasized the need to deliver care that provides a quality patient  
20 experience. The act has integrated patient experience scores as well as reporting  
21 mandates into hospital reimbursement strategies, which further incentivize excellence.  
22  
23 Patient experience scores are reported nationally in the US<sup>18</sup> and they may be a source of  
24 pride and engagement for health care teams and utilized to compete for patients.  
25  
26 The environment is different in Canada as there is currently no financial benefit and  
27 competition between institutions is not a driver for patient services. On the other hand,  
28 federal and provincial government health organizations have embraced patient experience  
29 as a priority for health care and they have initiated legislation to support its significance  
30 in quality delivery. Future public reporting of CPES-IC results and national  
31  
32  
33  
34  
35  
36  
37  
38  
39  
40  
41  
42  
43  
44  
45  
46  
47  
48  
49  
50  
51  
52  
53  
54  
55  
56  
57  
58  
59  
60

1  
2  
3 benchmarking will motivate quality improvement in this area and patient experience  
4  
5 surveying is currently mandatory for hospital accreditation. In Ontario, the Excellent  
6  
7 Care for All Act (2010) established that hospitals must develop sustained processes to  
8  
9 address and improve the patient experience<sup>19</sup>. Our own Institution has raised the profile  
10  
11 of patient experience to the level of a corporate target by integrating it as a foundation of  
12  
13 the vision of the hospital with a priority equal to other quality outcomes and efficiency.  
14  
15 In order to strategize to bring about improvements in patient experience, it is essential to  
16  
17 understand how the current American-based survey applies to Canadian culture and our  
18  
19 single-payer system. Specifically it is crucial to appreciate how to adjust for patient  
20  
21 demographics within different settings, not just to externally compare with other urban  
22  
23 institutions, but also to begin to internally identify factors that may influence overall  
24  
25 scoring and interpretation.  
26  
27  
28  
29

30  
31 The current study is not the first to examine the role of patient and other covariates in the  
32  
33 modeling of measures of overall patient experience in Canada<sup>20</sup>. However in the latter  
34  
35 work, the analysis involved the HCAHPS survey focusing on the single question of rate  
36  
37 experience. The authors did demonstrate a similar relationship with higher level of  
38  
39 education, urgent admission status and longer length of stay as predictive of poorer  
40  
41 measures of experience rating however they did not include patient-perceived physical  
42  
43 and mental health status, both of which were the most consistent and significant  
44  
45 predictors of overall care.  
46  
47  
48

49  
50 It may not be feasible to generalize from the analysis at a single hospital due to the  
51  
52 differing contributions of the patient covariates and interactions with the specific domains  
53  
54 of patient care at each hospital across the country<sup>21</sup>. For example, race was not found to  
55  
56  
57  
58  
59  
60

1  
2  
3 be a significant factor for most questions unlike in the United States<sup>21</sup>. This finding may  
4 only be relevant in the context of our centre (a medium-sized Canadian city), whereas it  
5 may not apply to larger metropolitan centers such as Toronto and Montreal, where there  
6 may be greater ethnic diversity. On the other hand, the finding that women are less likely  
7 to provide a topbox scoring on questions of overall experience is in keeping with  
8 previous findings with the HCAHPS survey<sup>22</sup>.  
9

10 Patient experience key driver analysis has been utilized to focus attention and initiatives  
11 in patient-care areas with high potential to impact on the overall global measures of care.  
12 The new CPES-IC survey has been designed to not only include domains currently in the  
13 HCAHPS survey, but also domains reflecting patient-centred care, transition of care and  
14 the processes of direct or emergency admission. Although these new domains have not  
15 been formally validated in the Canadian context, they were all identified as areas of  
16 potential high yield in our study in terms of overall contribution to the patient experience.  
17 Many of these questions refer to key issues of team communication and the perception of  
18 coordination of care; items that could be addressed through team re-structuring,  
19 checklists and scheduling. On the other hand, nursing and doctor communication skills,  
20 though important, did not support targets of high yield in terms of hospital resources.  
21 There are multiple important implications of this work. The analysis highlights the  
22 differences in adjusted and unadjusted rankings between departments, which emphasize  
23 the importance of the use of the demographic covariates obtained from the survey such as  
24 perception of physical and mental health and education level. The adjusted improved  
25 measures in Medicine and Family Medicine underscore that chronic disease and  
26 comorbidity must be taken into account in patient experience initiatives. Recognition of  
27  
28  
29  
30  
31  
32  
33  
34  
35  
36  
37  
38  
39  
40  
41  
42  
43  
44  
45  
46  
47  
48  
49  
50  
51  
52  
53  
54  
55  
56  
57  
58  
59  
60

1  
2  
3 adjusted results also enhances engagement of staff who face the challenges of chronic  
4 disease care and provides the opportunity to follow for improvements.  
5  
6

7  
8 The analysis may be limited by unknown and unmeasured covariates. Only a few of the  
9  
10 covariates from the administrative database were significant in models describing  
11  
12 perceptions of excellence in individual questions of overall care. Further work will be  
13  
14 necessary to determine if these administrative database variables are important at model  
15  
16 development at the unit or provider level. Although there was no difference between  
17  
18 departments in any of the questions, more subtle comparisons such as between divisions  
19  
20 and services may be important in understanding how to advance patient experience  
21  
22 initiatives. Finally, patient care domains were not included as covariates in the derivation  
23  
24 of the multivariable models for the global overall questions. We elected not to do this as  
25  
26 we felt the domains as covariates would demonstrate significant bias due to their  
27  
28 correlation not only to the outcomes but also to many of the other predictors. Therefore,  
29  
30 we elected rather to look at their interactions and correlations using key driver analysis.  
31  
32  
33 In summary, this analysis provides a perspective on drivers that must be considered when  
34  
35 assessing patients' perceptions on the overall care at a health care institution in Canada.  
36  
37  
38 Health care institutions must incorporate patient demographics and self-reported aspects  
39  
40 of perceived health into the analysis of patient experience data to properly interpret this  
41  
42 information particularly when comparing departments and units within the institution.  
43  
44  
45 We believe that this understanding will form the basis for a strategy of thoughtful data-  
46  
47 driven targeted interventions to improve the patient experience.  
48  
49  
50  
51  
52  
53  
54  
55  
56  
57  
58  
59  
60

1  
2  
3 Figure Legends:  
4  
5  
6  
7

8 Figure 1: Unadjusted and adjusted predicted percent topbox of corporate indicator “Rate  
9 your experience” by hospital department. Error bars represent 95% CI. Difference  
10 between Surgery/ENT and Medicine significant ( $p=0.05$ ) in Unadjusted, however no  
11 differences between departments in Adjusted. Adjustment was completed using all of the  
12 variables in the multivariable model.  
13  
14  
15  
16  
17

18  
19 Figure 2: Unadjusted and adjusted predicted percent topbox of corporate indicator  
20 “Recommend this hospital” by hospital department. Error bars represent 95% CI. No  
21 statistically significant difference between groups. Adjustment was completed using all  
22 of the variables in the multivariable model.  
23  
24  
25  
26  
27

28 Figure 3: Key driver analysis: relationship domain composite measures to the global  
29 measure of Overall Experience, direct admission (left) and emergency admission(right).  
30 Horizontal black dotted line – mean for all correlation values. Vertical red dotted line –  
31 median for all composites. A- Communication doctors, B- Communication nurses, C-  
32 Responsiveness staff, D-Care transition, E-Person-centred care, F-Pain management, G-  
33 Communication medications, H – Admission processes emergency, I – Admission  
34 processes elective  
35  
36  
37  
38  
39  
40  
41  
42  
43  
44  
45  
46  
47  
48  
49  
50  
51  
52  
53  
54  
55  
56  
57  
58  
59  
60

|                              | Total<br>(n=2989) | Surgery<br>(n=1699) | Medicine<br>(n=1023) | Family<br>Medicine<br>(n=79) | Obs/Gyn<br>(n=95) | <i>p</i> |
|------------------------------|-------------------|---------------------|----------------------|------------------------------|-------------------|----------|
| <b>Physical health, n(%)</b> |                   |                     |                      |                              |                   | <0.001   |
| Excellent                    | 272 (9.3)         | 210 (12.4)          | 45 (4.4)             | 4 (5.1)                      | 11 (11.5)         |          |
| Very Good                    | 812 (27.7)        | 583 (34.3)          | 166 (16.2)           | 8 (10.1)                     | 46 (48.4)         |          |
| Good                         | 1008 (34.3)       | 612 (36.0)          | 328 (32.1)           | 37 (46.8)                    | 22 (23.2)         |          |
| Fair                         | 616 (21.0)        | 243 (14.3)          | 329 (32.2)           | 19 (24.1)                    | 14 (14.7)         |          |
| Poor                         | 227 (7.7)         | 51 (3)              | 155 (15.2)           | 11 (13.9)                    | 2 (2.1)           |          |
| <b>Mental health, n(%)</b>   |                   |                     |                      |                              |                   | <0.001   |
| Excellent                    | 705 (24.0)        | 484 (28.5)          | 180 (17.5)           | 10 (12.8)                    | 23 (29.2)         |          |
| Very Good                    | 1036 (35.3)       | 636 (37.5)          | 323 (31.5)           | 25 (32.1)                    | 42 (44.2)         |          |
| Good                         | 786 (26.8)        | 411 (24.2)          | 321 (31.3)           | 24 (30.8)                    | 20 (21.1)         |          |
| Fair                         | 335 (11.4)        | 141 (8.3)           | 160 (15.6)           | 15 (19.2)                    | 9 (9.5)           |          |
| Poor                         | 76 (2.6)          | 26 (1.5)            | 43 (4.2)             | 4 (5.1)                      | 1 (1.1)           |          |
| <b>Education, n(%)</b>       |                   |                     |                      |                              |                   | 0.289    |
| 8th Grade                    | 182 (6.4)         | 92 (5.6)            | 78 (7.8)             | 8 (10.4)                     | 2 (2.2)           |          |
| College/CEGE<br>P            | 676 (23.6)        | 417 (25.2)          | 214 (21.4)           | 12 (15.6)                    | 21 (22.8)         |          |
| Some High<br>School          | 315 (11.0)        | 178 (10.8)          | 109 (10.9)           | 12 (15.6)                    | 10 (10.9)         |          |
| High School                  | 682 (23.9)        | 370 (22.4)          | 270 (27.0)           | 18 (23.4)                    | 16 (17.4)         |          |
| Undergraduate                | 456 (16.0)        | 265 (11.0)          | 156 (15.6)           | 15 (19.5)                    | 16 (17.4)         |          |
| Post Graduate                | 548 (19.2)        | 331 (20.0)          | 172 (17.2)           | 12 (15.6)                    | 27 (29.4)         |          |
| <b>Race, n(%)</b>            |                   |                     |                      |                              |                   | 0.223    |
| White                        | 2555 (89.7)       | 1518 (90.7)         | 896 (89.2)           | 62 (79.5)                    | 79 (84.0)         |          |
| Black                        | 53 (1.9)          | 26 (1.6)            | 26 (2.6)             | 1 (1.3)                      | 0                 |          |
| Arab                         | 43 (1.5)          | 25 (1.5)            | 13 (1.3)             | 2 (2.6)                      | 3 (3.2)           |          |
| First Nation                 | 20 (0.7)          | 13 (0.8)            | 5 (0.5)              | 1 (1.3)                      | 1 (1.1)           |          |
| Oriental                     | 69 (2.4)          | 36 (2.2)            | 30 (3.0)             | 3 (3.9)                      | 0                 |          |
| Indian                       | 54 (1.9)          | 24 (1.4)            | 22 (22.2)            | 4 (5.1)                      | 4 (4.3)           |          |
| Other                        | 55 (1.9)          | 31 (1.9)            | 12 (1.2)             | 5 (6.4)                      | 7 (7.5)           |          |
| <b>Elixclass, n(%)</b>       |                   |                     |                      |                              |                   | <0.001   |
| <0                           | 90 (3.1)          | 60 (3.5)            | 28 (2.7)             | 2 (2.5)                      | 0                 |          |
| 0                            | 1606 (54.5)       | 1123 (65.3)         | 403 (38.3)           | 42 (51.9)                    | 38 (40)           |          |
| 1 to 5                       | 693 (23.5)        | 382 (22.2)          | 245 (23.3)           | 26 (32.1)                    | 40 (42.1)         |          |
| 6 to 13                      | 370 (12.6)        | 86 (5.0)            | 269 (25.6)           | 10 (12.4)                    | 5 (5.3)           |          |
| >13                          | 189 (6.4)         | 69 (4.0)            | 107 (10.2)           | 1 (1.2)                      | 12 (12.6)         |          |
| <b>Admit, n(%)</b>           |                   |                     |                      |                              |                   | <0.001   |
| Elective                     | 1037 (35.2)       | 896 (50.1)          | 79 (7.5)             | 0                            | 62 (65.3)         |          |
| Emergent                     | 1709 (58.0)       | 720 (41.9)          | 880 (83.7)           | 80 (98.8)                    | 29 (30.5)         |          |
| Urgent                       | 202 (6.9)         | 104 (6.1)           | 93 (8.8)             | 1 (1.2)                      | 4 (4.2)           |          |



|                                   |             |             |            |           |           |        |
|-----------------------------------|-------------|-------------|------------|-----------|-----------|--------|
| <b>Age group, n(%)</b>            |             |             |            |           |           | <0.001 |
| 18-34                             | 134 (4.6)   | 90 (5.2)    | 39 (3.7)   | 2 (2.5)   | 3 (3.2)   |        |
| 35-44                             | 152 (5.2)   | 89 (5.2)    | 46 (4.4)   | 3 (3.7)   | 14 (14.7) |        |
| 45-54                             | 313 (10.6)  | 219 (12.7)  | 80 (7.6)   | 0         | 14 (14.7) |        |
| 55-64                             | 622 (21.1)  | 383 (22.3)  | 202 (19.2) | 10 (12.4) | 27 (28.4) |        |
| 65-79                             | 1136 (38.6) | 687 (39.9)  | 394 (37.5) | 25 (30.9) | 30 (31.6) |        |
| >79                               | 590 (20.0)  | 252 (14.7)  | 290 (27.6) | 41 (50.6) | 7 (7.4)   |        |
| <b>Any psi, n(%)</b>              | 321 (10.9)  | 205 (11.9)  | 96 (9.1)   | 10 (12.4) | 10 (10.5) | 0.145  |
| <b>LOS (days), median(IQR)</b>    | 4 (2, 7)    | 3 (2, 6)    | 5 (3, 8)   | 5 (3, 9)  | 3 (2, 4)  | <0.001 |
| <b>Income decile, median(IQR)</b> | 8 (5, 9)    | 8 (5, 9)    | 8 (5, 9)   | 8 (5, 9)  | 8 (6, 9)  | 0.449  |
| <b>ICU, n(%)</b>                  | 102 (3.5)   | 60 (3.5)    | 41 (3.9)   | 1 (1.2)   | 0         | 0.914  |
| <b>Married/partner n(%)</b>       | 1904 (64.6) | 1153 (67.0) | 650 (61.8) | 42 (51.9) | 59 (62.1) | 0.003  |
| <b>Sex female n(%)</b>            | 1435 (48.7) | 794 (41.2)  | 502 (47.7) | 45 (55.6) | 100       | <0.001 |
| <b>Campus A n(%)</b>              | 1308 (43.8) | 834 (48.5)  | 423 (40.2) | 51 (63.0) | 0         | <0.001 |
| <b>ED isit within 7 days n(%)</b> | 226 (7.6)   | 144 (8.4)   | 68 (6.5)   | 8 (9.9)   | 5 (5.3)   | 0.195  |
| <b>Discharge disposition n(%)</b> |             |             |            |           |           | <0.001 |
| Home                              | 1885 (63.2) | 1220 (71.1) | 548 (52.2) | 35 (43.2) | 72 (75.8) |        |
| Home-setting                      | 872 (29.2)  | 367 (21.4)  | 425 (40.5) | 37 (45.7) | 21 (22.1) |        |
| Another health facility           | 226 (7.6)   | 130 (7.6)   | 76 (7.2)   | 9 (11.1)  | 2 (2.1)   |        |
| Topbox Rate Experience n(%)       | 1963 (69.1) | 1191 (71.2) | 662 (66.3) | 45 (57.7) | 65 (69.2) | 0.008  |
| Topbox Recommend Hospital n(%)    | 2168 (74.8) | 1294 (76.1) | 752 (73.2) | 52 (66.7) | 70 (73.7) | 0.126  |
| Topbox Rate Hospital n(%)         | 1737 (60.4) | 1049 (62.2) | 591 (58.0) | 37 (47.4) | 60 (63.8) | 0.014  |
| Topbox Overall Helped n(%)        | 2145 (74.6) | 1325 (78.7) | 701 (68.8) | 46 (57.5) | 73 (78.5) | <0.001 |

Table 1: Characteristics of patients answering patient experience survey. Abbreviations: Elixclass – Elixhauser class, psi – patient safety indicator event, LOS – length of stay, ALC – alternate level of care at discharge, ICU – intensive care unit stay

|                        | <i>Multivariable Analysis</i> | <i>p</i> | <b>LR test (<i>p</i>)</b> |
|------------------------|-------------------------------|----------|---------------------------|
| <b>Department</b>      |                               |          | 0.671                     |
| Surgery/ENT            | reference                     |          |                           |
| Medicine               | 1.08 (0.87, 1.34)             | 0.502    |                           |
| Family                 | 0.82 (0.49, 1.39)             | 0.468    |                           |
| Obs/Gyn                | 0.88 (0.54, 1.44)             | 0.620    |                           |
| <b>Physical Health</b> |                               |          | <0.001                    |
| Excellent              | reference                     |          |                           |
| Very Good              | 0.71(0.48, 1.05)              | 0.083    |                           |
| Good                   | 0.49(0.33, 0.73)              | <0.001   |                           |
| Fair                   | 0.48(0.31, 0.74)              | 0.001    |                           |
| Poor                   | 0.40(0.24, 0.67)              | <0.001   |                           |
| <b>Mental Health</b>   |                               |          | <0.001                    |
| Excellent              | reference                     |          |                           |
| Very Good              | 0.77(0.60, 1.00)              | 0.051    |                           |
| Good                   | 0.57(0.43, 0.76)              | <0.001   |                           |
| Fair                   | 0.43(0.30, 0.62)              | <0.001   |                           |
| Poor                   | 0.40(0.22, 0.73)              | 0.003    |                           |
| <b>Education</b>       |                               |          | 0.007                     |
| 8th Grade              | reference                     |          |                           |
| Some High School       | 1.02(0.64, 1.64)              | 0.924    |                           |
| High School            | 0.69(0.45, 1.04)              | 0.077    |                           |
| College/CEGEP          | 0.56(0.37, 0.86)              | 0.007    |                           |
| Undergraduate          | 0.44(0.29, 0.69)              | <0.001   |                           |
| Post Graduate          | 0.42(0.28, 0.65)              | <0.001   |                           |
| <b>Admit-Urgent</b>    | 0.86(0.72, 1.02)              | 0.075    | 0.075                     |
| <b>Sex Male</b>        | 1.22(1.02, 1.47)              | 0.030    | 0.031                     |
| <b>Race</b>            |                               |          | 0.243                     |
| White                  | reference                     |          |                           |
| Black                  | 1.45(0.73, 2.91)              | 0.289    |                           |
| Arab                   | 0.98(0.49, 1.97)              | 0.958    |                           |
| First Nation           | 0.59(0.20, 1.79)              | 0.355    |                           |
| Oriental               | 1.43(0.80, 2.54)              | 0.226    |                           |
| Indian                 | 1.18(0.63, 2.21)              | 0.611    |                           |
| Other                  | 0.53(0.29, 0.98)              | 0.043    |                           |
| <b>Elixclass</b>       |                               |          | 0.064                     |
| <0                     | reference                     |          |                           |
| 0                      | 0.56(0.31, 0.99)              | 0.045    |                           |
| 1 to 5                 | 0.72(0.40, 1.31)              | 0.282    |                           |
| 6 to 13                | 0.57(0.30, 1.05)              | 0.073    |                           |
| >13                    | 0.61(0.32, 1.20)              | 0.151    |                           |

|                                               |                  |        |       |
|-----------------------------------------------|------------------|--------|-------|
| <b>Age Group</b>                              |                  |        | 0.007 |
| 18-34                                         | reference        |        |       |
| 35-44                                         | 1.64(0.97, 2.77) | 0.066  |       |
| 45-54                                         | 1.73(1.09, 2.72) | 0.019  |       |
| 55-64                                         | 2.28(1.49, 3.51) | <0.001 |       |
| 65-79                                         | 2.07(1.37, 3.13) | 0.001  |       |
| >79                                           | 1.83(1.18, 2.84) | 0.007  |       |
| <b>Any psi</b>                                | 0.98(0.73, 1.32) | 0.879  | 0.879 |
| <b>LOS (&gt;3 days)</b>                       | 0.85(0.69, 1.04) | 0.122  | 0.122 |
| <b>Income decile<sup>1</sup></b>              | 0.95(0.83, 1.10) | 0.521  | 0.521 |
| <b>ICU</b>                                    | 1.24(0.75, 2.04) | 0.407  | 0.402 |
| <b>Married/Partner</b>                        | 0.93(0.76, 1.12) | 0.426  | 0.425 |
| <b>Emergency visit within 7 days post d/c</b> | 0.77(0.56, 1.06) | 0.107  | 0.110 |
| <b>Discharge</b>                              |                  |        | 0.116 |
| Home                                          | reference        |        |       |
| Home setting                                  | 0.91(0.74, 1.14) | 0.423  |       |
| Another facility                              | 0.69(0.48, 0.98) | 0.037  |       |
| <b>Campus</b>                                 |                  | 0.332  |       |

Table 2: Analysis of covariates associated with topbox designation of the corporate measure of “Rate experience”. 1 log transformed. Abbreviations: Elixclass – Elixhauser class, psi – patient safety indicator event, LOS – length of stay, ALC – alternate level of care at discharge, ICU – intensive care unit stay, LR – likelihood ratio

|                        | <b>Multivariable Analysis</b> | <b><i>p</i></b> | <b>LR test (<i>p</i>)</b> |
|------------------------|-------------------------------|-----------------|---------------------------|
| <b>Department</b>      |                               |                 | 0.908                     |
| Surgery/ENT            | reference                     |                 |                           |
| Medicine               | 1.06(0.84, 1.34)              | 0.620           |                           |
| Family                 | 0.89(0.51, 1.53)              | 0.669           |                           |
| Obs/Gyn                | 1.03(0.62, 1.72)              | 0.913           |                           |
| <b>Physical Health</b> |                               |                 | 0.018                     |
| Excellent              | reference                     |                 |                           |
| Very Good              | 0.74(0.49, 1.12)              | 0.152           |                           |
| Good                   | 0.54(0.36, 0.81)              | 0.003           |                           |
| Fair                   | 0.56(0.35, 0.88)              | 0.012           |                           |
| Poor                   | 0.557(0.323, 0.959)           | 0.035           |                           |
| <b>Mental Health</b>   |                               |                 | <0.001                    |
| Excellent              | reference                     |                 |                           |
| Very Good              | 0.90(0.69, 1.18)              | 0.435           |                           |
| Good                   | 0.63(0.47, 0.85)              | 0.002           |                           |
| Fair                   | 0.56(0.39, 0.81)              | 0.002           |                           |
| Poor                   | 0.39(0.21, 0.71)              | 0.001           |                           |
| <b>Education</b>       |                               |                 | <0.001                    |
| 8th Grade              | reference                     |                 |                           |
| Some High School       | 1.07(0.67, 1.73)              | 0.768           |                           |
| High School            | 0.94(0.62, 1.45)              | 0.793           |                           |
| College/CEGEP          | 0.67(0.44, 1.03)              | 0.069           |                           |
| Undergraduate          | 0.57(0.36, 0.89)              | 0.014           |                           |
| Post Graduate          | 0.63(0.41, 0.99)              | 0.045           |                           |
| <b>Race</b>            |                               |                 | <0.001                    |
| White                  | reference                     |                 |                           |
| Black                  | 5.63(1.72, 18.45)             | 0.004           |                           |
| Arab                   | 1.56(0.70, 3.49)              | 0.273           |                           |
| First Nation           | 0.38(0.13, 1.11)              | 0.078           |                           |
| Oriental               | 2.09(1.07, 4.11)              | 0.032           |                           |
| Indian                 | 1.64(0.81, 3.33)              | 0.168           |                           |
| Other                  | 0.51(0.28, 0.93)              | 0.028           |                           |
| <b>Elixclass</b>       |                               |                 | 0.197                     |
| <0                     | reference                     |                 |                           |
| 0                      | 0.48(0.26, 0.93)              | 0.030           |                           |
| 1 to 5                 | 0.54(0.27, 1.05)              | 0.068           |                           |
| 6 to 13                | 0.56(0.28, 1.13)              | 0.103           |                           |
| >13                    | 0.51(0.25, 1.07)              | 0.074           |                           |
| <b>Admit Urgent</b>    | 0.98(0.82, 1.17)              | 0.843           | 0.843                     |

|                                               |                  |        |        |
|-----------------------------------------------|------------------|--------|--------|
| <b>Age Group</b>                              |                  |        | 0.048  |
| 18-34                                         | reference        |        |        |
| 35-44                                         | 1.17(0.67, 2.06) | 0.566  |        |
| 45-54                                         | 1.82(1.11, 3.00) | 0.019  |        |
| 55-64                                         | 1.85(1.16, 2.93) | 0.009  |        |
| 65-79                                         | 1.58(1.02, 2.46) | 0.042  |        |
| >79                                           | 1.37(0.86, 2.19) | 0.185  |        |
| <b>Any psi</b>                                | 1.09(0.79, 1.49) | 0.600  | 0.092  |
| <b>LOS &gt; 3 days</b>                        | 0.88(0.71, 1.09) | 0.247  | 0.248  |
| <b>Income decile<sup>1</sup></b>              | 1.01(0.87, 1.17) | 0.908  | 0.908  |
| <b>ICU</b>                                    | 1.62(0.92, 2.87) | 0.098  | 0.086  |
| <b>Married/Partner</b>                        | 0.80(0.65, 0.98) | 0.031  | 0.030  |
| <b>Sex male</b>                               | 1.41(1.16, 1.70) | <0.001 | <0.001 |
| <b>Emergency visit within 7 days post d/c</b> | 0.75(0.54, 1.04) | 0.088  | 0.081  |
| <b>Discharge</b>                              |                  |        | 0.037  |
| Home                                          | reference        |        |        |
| Home setting                                  | 0.76(0.61, 0.96) | 0.020  |        |
| Another facility                              | 0.71(0.49, 1.03) | 0.069  |        |
| <b>Campus</b>                                 |                  | 1.000  |        |

Table 3: Analysis of covariates associated with topbox measure of “Recommend this hospital”. 1 log transformed..Abbreviations: Elixclass – Elixhauser class, psi – patient safety indicator event, LOS – length of stay, ALC – alternate level of care at discharge, ICU – intensive care unit stay

|                        | <b>Multivariable Analysis</b> | <b><i>p</i></b> | <b>LR test (<i>p</i>)</b> |
|------------------------|-------------------------------|-----------------|---------------------------|
| <b>Department</b>      |                               |                 | 0.496                     |
| Surgery/ENT            | reference                     |                 |                           |
| Medicine               | 0.96(0.78, 1.18)              | 0.676           |                           |
| Family                 | 0.71(0.43, 1.19)              | 0.197           |                           |
| Obs/Gyn                | 1.20(0.75, 1.93)              | 0.451           |                           |
| <b>Physical Health</b> |                               |                 | <0.001                    |
| Excellent              | reference                     |                 |                           |
| Very Good              | 0.70(0.50, 0.99)              | 0.041           |                           |
| Good                   | 0.49(0.34, 0.69)              | <0.001          |                           |
| Fair                   | 0.61(0.42, 0.91)              | 0.014           |                           |
| Poor                   | 0.67(0.41, 1.09)              | 0.109           |                           |
| <b>Mental Health</b>   |                               |                 | <0.001                    |
| Excellent              | reference                     |                 |                           |
| Very Good              | 0.74(0.59, 0.94)              | 0.013           |                           |
| Good                   | 0.58(0.45, 0.76)              | <0.001          |                           |
| Fair                   | 0.52(0.37, 0.73)              | <0.001          |                           |
| Poor                   | 0.51(0.28, 0.91)              | 0.024           |                           |
| <b>Education</b>       |                               |                 | <0.001                    |
| 8th Grade              | reference                     |                 |                           |
| Some High School       | 1.16(0.75, 1.77)              | 0.507           |                           |
| High School            | 0.90(0.62, 1.32)              | 0.599           |                           |
| College/CEGEP          | 0.61(0.42, 0.90)              | 0.013           |                           |
| Undergraduate          | 0.47(0.32, 0.72)              | <0.001          |                           |
| Post Graduate          | 0.49(0.32, 0.71)              | <0.001          |                           |
| <b>Race</b>            |                               |                 | 0.399                     |
| White                  | reference                     |                 |                           |
| Black                  | 1.70(0.88, 3.29)              | 0.114           |                           |
| Arab                   | 0.95(0.50, 1.82)              | 0.879           |                           |
| First Nation           | 0.70(0.24, 2.01)              | 0.503           |                           |
| Oriental               | 1.26(0.74, 2.14)              | 0.403           |                           |
| Indian                 | 1.23(0.67, 2.26)              | 0.501           |                           |
| Other                  | 0.66(0.36, 1.19)              | 0.166           |                           |
| <b>Admit Urgent</b>    | 0.87(0.74, 1.02)              |                 | 0.093                     |
| <b>Sex Male</b>        | 1.31(1.10, 1.55)              | 0.002           | 0.002                     |
| <b>Elixclass</b>       |                               |                 | 0.073                     |
| <0                     | reference                     |                 |                           |
| 0                      | 0.56(0.34, 0.93)              | 0.025           |                           |
| 1 to 5                 | 0.69(0.40, 1.17)              | 0.169           |                           |
| 6 to 13                | 0.66(0.38, 1.16)              | 0.148           |                           |
| >13                    | 0.59(0.32, 1.07)              | 0.083           |                           |

|                                               |                  |        |       |
|-----------------------------------------------|------------------|--------|-------|
| <b>Age Group</b>                              |                  |        | 0.001 |
| 18-34                                         | reference        |        |       |
| 35-44                                         | 1.47(0.89, 2.44) | 0.136  |       |
| 45-54                                         | 2.03(1.30, 3.17) | 0.002  |       |
| 55-64                                         | 2.35(1.54, 3.58) | <0.001 |       |
| 65-79                                         | 2.03(1.35, 3.04) | 0.001  |       |
| >79                                           | 1.82(1.19, 2.80) | 0.006  |       |
| <b>Any psi</b>                                | 0.92(0.69, 1.22) | 0.544  | 0.544 |
| <b>LOS &gt; 3 days</b>                        | 0.96(0.79, 1.16) | 0.668  | 0.668 |
| <b>Income decile<sup>1</sup></b>              | 1.06(0.93, 1.21) | 0.395  | 0.395 |
| <b>ICU</b>                                    | 1.93(1.17, 3.19) | 0.010  | 0.008 |
| <b>Married/Partner</b>                        | 0.89(0.74, 1.06) | 0.200  | 0.200 |
| <b>Emergency visit within 7 days post d/c</b> | 0.76(0.56, 1.04) | 0.083  | 0.084 |
| <b>Discharge</b>                              |                  |        | 0.016 |
| Home                                          | reference        |        |       |
| Home setting                                  | 0.81(0.66, 1.00) | 0.052  |       |
| Another facility                              | 0.70(0.50, 0.99) | 0.046  |       |
| <b>Campus</b>                                 |                  | 0.008  |       |

Table 4: Analysis of covariates associated with topbox measure of “Rate this hospital”. 1 log transformed..Abbreviations: Elixclass – Elixhauser class, psi – patient safety indicator event, LOS – length of stay, ALC – alternate level of care at discharge, ICU – intensive care unit stay

|                        | <b>Multivariable Analysis</b> | <b><i>p</i></b> | <b>LR test (<i>p</i>)</b> |
|------------------------|-------------------------------|-----------------|---------------------------|
| <b>Department</b>      |                               |                 | 0.167                     |
| Surgery/ENT            | reference                     |                 |                           |
| Medicine               | 0.83(0.66, 1.04)              | 0.113           |                           |
| Family                 | 0.60(0.36, 1.01)              | 0.047           |                           |
| Obs/Gyn                | 0.85(0.49, 1.47)              | 0.558           |                           |
| <b>Physical Health</b> |                               |                 | <0.001                    |
| Excellent              | reference                     |                 |                           |
| Very Good              | 0.89(0.58, 1.37)              | 0.601           |                           |
| Good                   | 0.59(0.38, 0.90)              | 0.014           |                           |
| Fair                   | 0.57(0.36, 0.91)              | 0.019           |                           |
| Poor                   | 0.39(0.23, 0.68)              | 0.001           |                           |
| <b>Mental Health</b>   |                               |                 | <0.001                    |
| Excellent              | reference                     |                 |                           |
| Very Good              | 0.70(0.53, 0.94)              | 0.019           |                           |
| Good                   | 0.52(0.39, 0.71)              | <0.001          |                           |
| Fair                   | 0.44(0.30, 0.64)              | <0.001          |                           |
| Poor                   | 0.44(0.24, 0.81)              | 0.008           |                           |
| <b>Education</b>       |                               |                 | 0.126                     |
| 8th Grade              | reference                     |                 |                           |
| Some High School       | 1.03(0.64, 1.63)              | 0.914           |                           |
| High School            | 0.87(0.57, 1.31)              | 0.500           |                           |
| College/CEGEP          | 0.81(0.53, 1.23)              | 0.319           |                           |
| Undergraduate          | 0.63(0.41, 0.98)              | 0.039           |                           |
| Post Graduate          | 0.79(0.51, 1.22)              | 0.285           |                           |
| <b>Race</b>            |                               |                 | 0.505                     |
| White                  | reference                     |                 |                           |
| Black                  | 1.81(0.81, 4.01)              | 0.146           |                           |
| Arab                   | 0.83(0.41, 1.69)              | 0.612           |                           |
| First Nation           | 0.94(0.28, 3.12)              | 0.920           |                           |
| Oriental               | 1.17(0.65, 2.12)              | 0.606           |                           |
| Indian                 | 1.04(0.55, 2.00)              | 0.895           |                           |
| Other                  | 0.61(0.33, 1.14)              | 0.122           |                           |
| <b>Admit Urgent</b>    | 0.86(0.72, 1.03)              | 0.108           | 0.109                     |
| <b>Sex Male</b>        | 1.01(0.83, 1.23)              | 0.906           | 0.906                     |
| <b>Elixclass</b>       |                               |                 | 0.079                     |
| <0                     | reference                     |                 |                           |
| 0                      | 0.70(0.39, 1.28)              | 0.252           |                           |
| 1 to 5                 | 0.98(0.52, 1.82)              | 0.938           |                           |
| 6 to 13                | 0.71(0.37, 1.37)              | 0.309           |                           |
| >13                    | 0.81(0.40, 1.62)              | 0.547           |                           |



|                                               |                  |       |       |
|-----------------------------------------------|------------------|-------|-------|
| <b>Age Group</b>                              |                  |       | 0.042 |
| 18-34                                         | reference        |       |       |
| 35-44                                         | 1.10(0.63, 1.91) | 0.739 |       |
| 45-54                                         | 1.82(1.10, 3.00) | 0.019 |       |
| 55-64                                         | 1.73(1.10, 2.75) | 0.018 |       |
| 65-79                                         | 1.56(1.01, 2.42) | 0.047 |       |
| >79                                           | 1.42(0.89, 2.26) | 0.254 |       |
| <b>Any psi</b>                                | 1.12(0.81, 1.54) | 0.492 | 0.490 |
| <b>LOS &gt; 3 days</b>                        | 0.91(0.73, 1.13) | 0.378 | 0.379 |
| <b>Income decile<sup>1</sup></b>              | 1.01(0.87, 1.17) | 0.912 | 0.912 |
| <b>ICU</b>                                    | 1.32(0.76, 2.27) | 0.325 | 0.316 |
| <b>Married/Partner</b>                        | 0.92(0.75, 1.13) | 0.418 | 0.417 |
| <b>Emergency visit within 7 days post d/c</b> | 0.76(0.54, 1.06) | 0.102 | 0.107 |
| <b>Discharge</b>                              |                  |       | 0.088 |
| Home                                          | reference        |       |       |
| Home setting                                  | 0.84(0.67, 1.05) | 0.128 |       |
| Another facility                              | 0.68(0.47, 0.99) | 0.043 |       |
| <b>Campus</b>                                 |                  | 0.999 |       |

Table 5: Analysis of covariates associated with topbox measure of “Overall helped”. 1 log transformed..Abbreviations: Elixclass – Elixhauser class, psi – patient safety indicator event, LOS – length of stay, ALC – alternate level of care at discharge, ICU – intensive care unit stay

Contributorship Statement: We certify that all of the authors have fulfilled the following four criteria to justify authorship:

- Substantial contributions to the conception or design of the work (F.D.R, S.S., A.F.); or the acquisition, analysis, or interpretation of data for the work (D.R., A.A.Z., T.R.); AND
- Drafting the work or revising it critically for important intellectual content (F.D.R., D.R., S.S., T.R., A.F.); AND
- Final approval of the version to be published (F.D.R., D.R., A.A.Z., S.S., T. R., A. F.; AND
- Agreement to be accountable for all aspects of the work in ensuring that questions related to the accuracy or integrity of any part of the work are appropriately investigated and resolved. (F. D. R., D. R., A. A. Z., S. S. , T. R. , A. F.

Competing Interests for authors: None

Funding: None

Data sharing statement: There is no additional unpublished data from the study. The study data is partially de-anonymized and therefore it is kept on a secure server at the Ottawa Hospital.

## References

1. Jha AK, Orav EJ, Zheng J, et al. Patients' perception of hospital care in the United States. *N Engl J Med* 2008;359(18):1921-31. doi: 10.1056/NEJMsa0804116
2. An act to amend various acts in the interest of patient-centred care. Legislative Assembly of Ontario. 1st Session ed, 2016.
3. Sacks GD, Lawson EH, Dawes AJ, et al. Relationship Between Hospital Performance on a Patient Satisfaction Survey and Surgical Quality. *JAMA Surg* 2015;150(9):858-64. doi: 10.1001/jamasurg.2015.1108
4. Anhang Price R, Elliott MN, Zaslavsky AM, et al. Examining the role of patient experience surveys in measuring health care quality. *Medical care research and review : MCRR* 2014;71(5):522-54. doi: 10.1177/1077558714541480
5. Arah OA, ten Asbroek AH, Delnoij DM, et al. Psychometric properties of the Dutch version of the Hospital-level Consumer Assessment of Health Plans Survey instrument. *Health Serv Res* 2006;41(1):284-301. doi: 10.1111/j.1475-6773.2005.00462.x
6. Krol MW, de Boer D, Rademakers JJ, et al. Overall scores as an alternative to global ratings in patient experience surveys; a comparison of four methods. *BMC Health Serv Res* 2013;13:479. doi: 10.1186/1472-6963-13-479
7. Sullivan P, Bell D. Investigation of the degree of organisational influence on patient experience scores in acute medical admission units in all acute hospitals in England using multilevel hierarchical regression modelling. *BMJ Open* 2017;7(1):e012133. doi: 10.1136/bmjopen-2016-012133

- 1  
2  
3 8. Hekkert KD, Cihangir S, Kleefstra SM, et al. Patient satisfaction revisited: a multilevel  
4  
5 approach. *Soc Sci Med* 2009;69(1):68-75. doi: 10.1016/j.socscimed.2009.04.016  
6  
7
- 8 9. Giordano LA, Elliott MN, Goldstein E, et al. Development, implementation, and  
9  
10 public reporting of the HCAHPS survey. *Medical care research and review* :  
11  
12 *MCRR* 2010;67(1):27-37. doi: 10.1177/1077558709341065  
13  
14
- 15 10. CIHI. Canadian Patient Experiences Survey — Inpatient Care Procedure Manual  
16  
17 2016 [Available from: ([https://www.cihi.ca/sites/default/files/document/cpes-ic-](https://www.cihi.ca/sites/default/files/document/cpes-ic-procedure-manual-en.pdf)  
18  
19 [procedure-manual-en.pdf](https://www.cihi.ca/sites/default/files/document/cpes-ic-procedure-manual-en.pdf).  
20  
21
- 22 11. Medicare. Medicare.gov | Hospital Compare 2017 [Available from:  
23  
24 <http://www.hospitalcompare.hhs.gov>.  
25
- 26 12. CMS Quality Strategy 2016 [Available from:  
27  
28 [https://www.cms.gov/Medicare/Quality-Initiatives-Patient-Assessment-](https://www.cms.gov/Medicare/Quality-Initiatives-Patient-Assessment-Instruments/QualityInitiativesGenInfo/Downloads/CMS-Quality-Strategy.pdf)  
29  
30 [Instruments/QualityInitiativesGenInfo/Downloads/CMS-Quality-Strategy.pdf](https://www.cms.gov/Medicare/Quality-Initiatives-Patient-Assessment-Instruments/QualityInitiativesGenInfo/Downloads/CMS-Quality-Strategy.pdf)  
31  
32  
33 accessed May 22, 2017.  
34
- 35 13. Hall JA, Dornan MC. Patient sociodemographic characteristics as predictors of  
36  
37 satisfaction with medical care: a meta-analysis. *Soc Sci Med* 1990;30(7):811-8.  
38  
39
- 40 14. Southern DA, Burnand B, Droesler SE, et al. Deriving ICD-10 Codes for Patient  
41  
42 Safety Indicators for Large-scale Surveillance Using Administrative Hospital  
43  
44 Data. *Med Care* 2017;55(3):252-60. doi: 10.1097/MLR.0000000000000649  
45  
46
- 47 15. Rodriguez HP, von Glahn T, Chang H, et al. Measuring patients' experiences with  
48  
49 individual specialist physicians and their practices. *Am J Med Qual*  
50  
51 2009;24(1):35-44. doi: 10.1177/1062860608326418  
52  
53  
54  
55  
56  
57  
58  
59  
60

- 1  
2  
3 16. Thiels CA, Hanson KT, Yost KJ, et al. Effect of Hospital Case Mix on the Hospital  
4  
5 Consumer Assessment of Healthcare Providers and Systems Star Scores: Are All  
6  
7 Stars the Same? *Ann Surg* 2016;264(4):666-73. doi:  
8  
9 10.1097/SLA.0000000000001847  
10  
11  
12 17. Improvement IfHC. Triple aim for populations [Available from:  
13  
14 <http://www.ihl.org/Topics/TripleAim/Pages/default.aspx> accessed May 22, 2017  
15  
16 2017.  
17  
18  
19 18. CAHPS Hospital Survey [Available from: <http://www.hcahponline.org/home.aspx>  
20  
21 accessed May 22, 2017.  
22  
23  
24 19. Calculation of HCAHPS Scores: From Raw Data to Publicly Reported Results  
25  
26 [Centers for Medicare and Medicaid Services web site] [Available from:  
27  
28 <http://www.hcahponline.org/Files/Calculation> of HCAHPS Scores.pdf. ).2011.  
29  
30  
31 20. Kemp KA, Chan N, McCormack B, et al. Drivers of Inpatient Hospital Experience  
32  
33 Using the HCAHPS Survey in a Canadian Setting. *Health Serv Res*  
34  
35 2015;50(4):982-97. doi: 10.1111/1475-6773.12271  
36  
37  
38 21. Elliott MN, Lehrman WG, Goldstein E, et al. Do hospitals rank differently on  
39  
40 HCAHPS for different patient subgroups? *Medical care research and review* :  
41  
42 *MCRR* 2010;67(1):56-73. doi: 10.1177/1077558709339066  
43  
44  
45 22. Elliott MN, Lehrman WG, Beckett MK, et al. Gender differences in patients'  
46  
47 perceptions of inpatient care. *Health Serv Res* 2012;47(4):1482-501. doi:  
48  
49 10.1111/j.1475-6773.2012.01389.x  
50  
51  
52  
53  
54  
55  
56  
57  
58  
59  
60

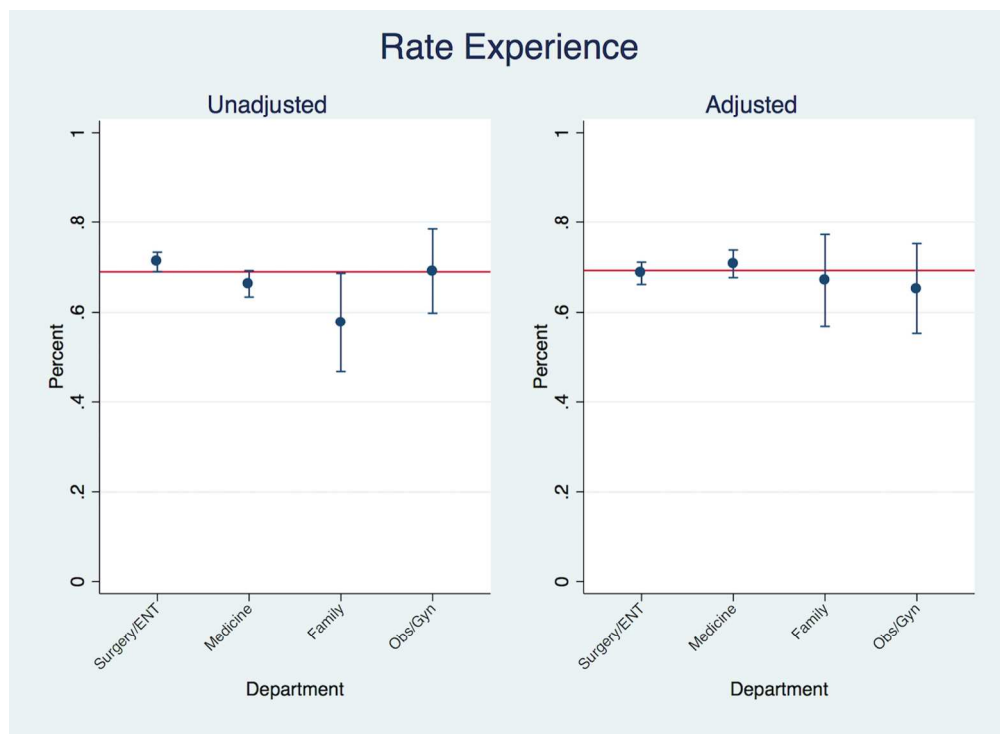

Figure 1: Unadjusted and adjusted predicted percent topbox of corporate indicator “Rate your experience” by hospital department. Error bars represent 95% CI. Difference between Surgery/ENT and Medicine significant ( $p=0.05$ ) in Unadjusted, however no differences between departments in Adjusted. Adjustment was completed using all of the variables in the multivariable model.

123x90mm (300 x 300 DPI)

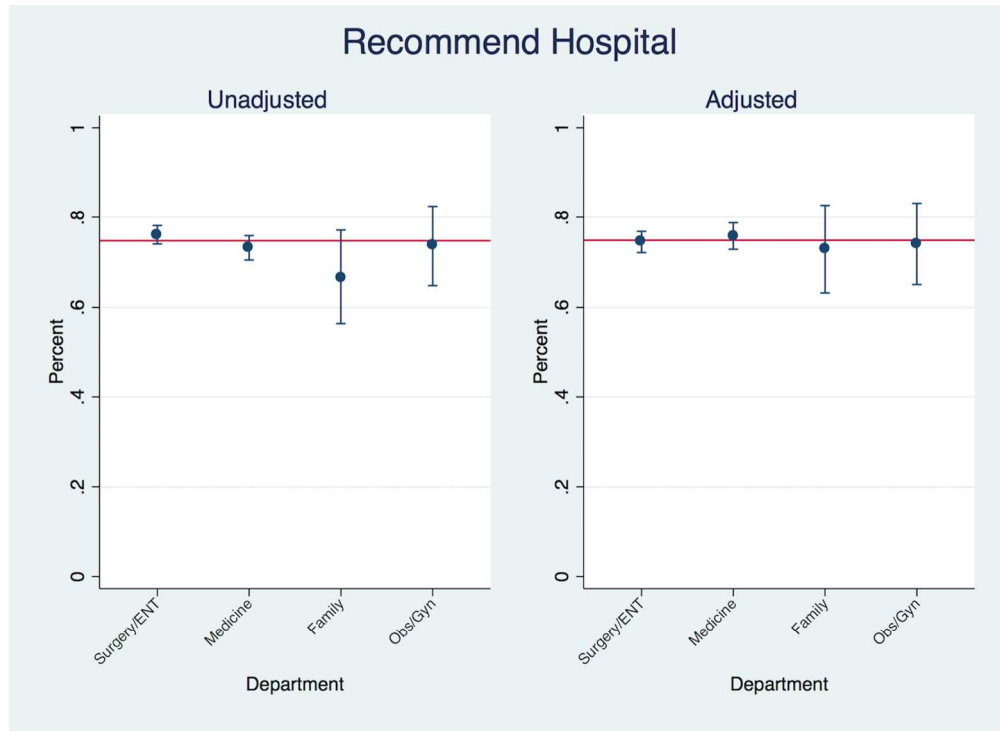

Figure 2: Unadjusted and adjusted predicted percent topbox of corporate indicator "Recommend this hospital" by hospital department. Error bars represent 95% CI. No statistically significant difference between groups. Adjustment was completed using all of the variables in the multivariable model.

123x90mm (300 x 300 DPI)

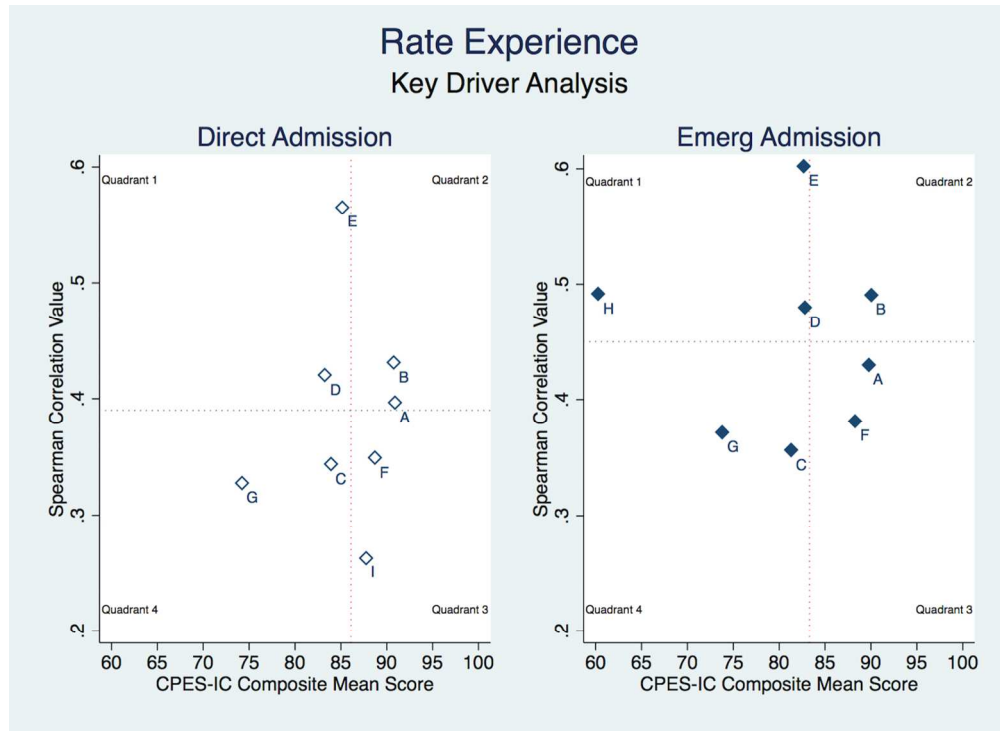

Figure 3: Key driver analysis: relationship domain composite measures to the global measure of Overall Experience, direct admission (left) and emergency admission(right). Horizontal black dotted line – mean for all correlation values. Vertical red dotted line – median for all composites. A- Communication doctors, B- Communication nurses, C- Responsiveness staff, D-Care transition, E-Person-centred care, F-Pain management, G-Communication medications, H – Admission processes emergency, I – Admission processes elective

123x90mm (300 x 300 DPI)

only



# Canadian Patient Experiences Survey—Inpatient Care

## Survey Instructions

- ◆ You should fill out this questionnaire only if you were the patient named on the envelope. You may need to get help from a family member or friend to answer the questions. That's okay.
- ◆ Answer all the questions by checking the box to the left of your answer.
- ◆ Your response to this survey is voluntary but will provide us with important information.
- ◆ You are sometimes told to skip over some questions in this survey. When this happens, you will see an arrow with a note that tells you what question to answer next, like this:

- Yes
- No → If No, go to Question 1

Placeholder for jurisdiction comments.

***Please answer the questions about your recent stay at the hospital named on the cover letter. Do not include any other hospital stays in your answers.***

### **YOUR CARE FROM NURSES**

**1. During this hospital stay, how often did nurses treat you with courtesy and respect?**

- Never
- Sometimes
- Usually
- Always

**2. During this hospital stay, how often did nurses listen carefully to you?**

- Never
- Sometimes
- Usually
- Always

**3. During this hospital stay, how often did nurses explain things in a way you could understand?**

- Never
- Sometimes
- Usually
- Always

**4. During this hospital stay, after you pressed the call button, how often did you get help as soon as you wanted it?**

- Never
- Sometimes
- Usually
- Always
- I never pressed the call button

---

**YOUR CARE FROM DOCTORS**

---

5. During this hospital stay, how often did doctors treat you with courtesy and respect?

- Never  
 Sometimes  
 Usually  
 Always

6. During this hospital stay, how often did doctors listen carefully to you?

- Never  
 Sometimes  
 Usually  
 Always

7. During this hospital stay, how often did doctors explain things in a way you could understand?

- Never  
 Sometimes  
 Usually  
 Always

---

**THE HOSPITAL ENVIRONMENT**

---

8. During this hospital stay, how often were your room and bathroom kept clean?

- Never  
 Sometimes  
 Usually  
 Always

9. During this hospital stay, how often was the area around your room quiet at night?

- Never  
 Sometimes  
 Usually  
 Always

---

**YOUR EXPERIENCES IN THIS HOSPITAL**

---

10. During this hospital stay, did you need help from nurses or other hospital staff in getting to the bathroom or in using a bedpan?

- Yes  
 No → If No, go to Question 12

11. How often did you get help in getting to the bathroom or in using a bedpan as soon as you wanted?

- Never  
 Sometimes  
 Usually  
 Always

12. During this hospital stay, did you need medicine for pain?

- Yes  
 No → If No, go to Question 15

13. During this hospital stay, how often was your pain well controlled?

- Never  
 Sometimes  
 Usually  
 Always

14. During this hospital stay, how often did the hospital staff do everything they could to help you with your pain?

- Never  
 Sometimes  
 Usually  
 Always

1  
2  
3  
4  
5  
6  
7  
8  
9  
10  
11  
12  
13  
14  
15  
16  
17  
18  
19  
20  
21  
22  
23  
24  
25  
26  
27  
28  
29  
30  
31  
32  
33  
34  
35  
36  
37  
38  
39  
40  
41  
42  
43  
44  
45  
46  
47  
48  
49  
50  
51  
52  
53  
54  
55  
56  
57  
58  
59  
60

**15. During this hospital stay, were you given any medicine that you had not taken before?**

Yes

No → If No, go to Question 18

**16. Before giving you any new medicine, how often did hospital staff tell you what the medicine was for?**

Never

Sometimes

Usually

Always

**17. Before giving you any new medicine, how often did hospital staff describe possible side effects in a way you could understand?**

Never

Sometimes

Usually

Always

#### **WHEN YOU LEFT THE HOSPITAL**

**18. After you left the hospital, did you go directly to your own home, to someone else's home or to another health facility?**

Own home

Someone else's home

Another health

facility → **If Another health facility, go to Question 21**

**19. During this hospital stay, did doctors, nurses or other hospital staff talk with you about whether you would have the help you needed when you left the hospital?**

Yes

No

**20. During this hospital stay, did you get information in writing about what symptoms or health problems to look out for after you left the hospital?**

Yes

No

#### **OVERALL RATING OF HOSPITAL**

*Please answer the following questions about your stay at the hospital named on the cover letter. Do not include any other hospital stays in your answers.*

**21. Using any number from 0 to 10, where 0 is the worst hospital possible and 10 is the best hospital possible, what number would you use to rate this hospital during your stay?**

0 Worst hospital possible

1

2

3

4

5

6

7

8

9

10 Best hospital possible

1  
2  
3  
4  
5  
6  
7  
8  
9  
10  
11  
12  
13  
14  
15  
16  
17  
18  
19  
20  
21  
22  
23  
24  
25  
26  
27  
28  
29  
30  
31  
32  
33  
34  
35  
36  
37  
38  
39  
40  
41  
42  
43  
44  
45  
46  
47  
48  
49  
50  
51  
52  
53  
54  
55  
56  
57  
58  
59  
60

**22. Would you recommend this hospital to your friends and family?**

- Definitely no  
 Probably no  
 Probably yes  
 Definitely yes

*In this next section, we ask several more questions about your stay at the hospital.*

### **YOUR ARRIVAL AT THE HOSPITAL**

**23. When you arrived at the hospital, did you go to the emergency department?**

- Yes → If Yes, go to Question 26  
 No ↓ If No, please continue below

**24. Before coming to the hospital, did you have enough information about what was going to happen during the admission process?**

- Not at all  
 Partly  
 Quite a bit  
 Completely

**25. Was your admission into the hospital organized?**

- Not at all  
 Partly  
 Quite a bit  
 Completely

**Go to Question 30**

**Answer questions 26 to 29 only if you were admitted through the emergency department.**

**26. When you were in the emergency department, did you get enough information about your condition and treatment?**

- Not at all  
 Partly  
 Quite a bit  
 Completely

**27. Were you given enough information about what was going to happen during your admission to the hospital?**

- Not at all  
 Partly  
 Quite a bit  
 Completely

**28. After you knew that you needed to be admitted to a hospital bed, did you have to wait too long before getting there?**

- Yes  
 No

**29. Was your transfer from the emergency department into a hospital bed organized?**

- Not at all  
 Partly  
 Quite a bit  
 Completely

**Continue with Question 30**

## **DURING YOUR HOSPITAL STAY**

---

**30. Do you feel that there was good communication about your care between doctors, nurses and other hospital staff?**

- Never
- Sometimes
- Usually
- Always

**31. How often did doctors, nurses and other hospital staff seem informed and up-to-date about your hospital care?**

- Never
- Sometimes
- Usually
- Always

**32. How often were tests and procedures done when you were told they would be done?**

- Never
- Sometimes
- Usually
- Always
- I did not have any tests or procedures

**33. During this hospital stay, did you get all the information you needed about your condition and treatment?**

- Never
- Sometimes
- Usually
- Always

**34. Did you get the support you needed to help you with any anxieties, fears or worries you had during this hospital stay?**

- Never
- Sometimes
- Usually
- Always
- Not applicable

**35. Were you involved as much as you wanted to be in decisions about your care and treatment?**

- Never
- Sometimes
- Usually
- Always

**36. Were your family or friends involved as much as you wanted in decisions about your care and treatment?**

- Never
- Sometimes
- Usually
- Always
- I did not want them to be involved
- I did not have family or friends to be involved

## **LEAVING THE HOSPITAL**

---

**37. Before you left the hospital, did you have a clear understanding about all of your prescribed medications, including those you were taking before your hospital stay?**

- Not at all
- Partly
- Quite a bit
- Completely
- Not applicable

1  
2  
3  
4  
5  
6  
7  
8  
9  
10  
11  
12  
13  
14  
15  
16  
17  
18  
19  
20  
21  
22  
23  
24  
25  
26  
27  
28  
29  
30  
31  
32  
33  
34  
35  
36  
37  
38  
39  
40  
41  
42  
43  
44  
45  
46  
47  
48  
49  
50  
51  
52  
53  
54  
55  
56  
57  
58  
59  
60

**38. Did you receive enough information from hospital staff about what to do if you were worried about your condition or treatment after you left the hospital?**

- Not at all
- Partly
- Quite a bit
- Completely

**39. When you left the hospital, did you have a better understanding of your condition than when you entered?**

- Not at all
- Partly
- Quite a bit
- Completely

**YOUR OVERALL RATINGS**

**40. Overall, do you feel you were helped by your hospital stay? Please answer on a scale where 0 is “not helped at all” and 10 is “helped completely.”**

**Overall . . . (Please circle a number)**



**41. Overall . . . (Please circle a number)**

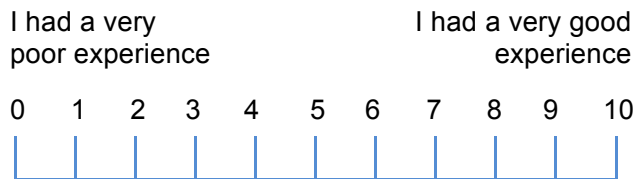

**ABOUT YOU**

**42. In general, how would you rate your overall physical health?**

- Excellent
- Very good
- Good
- Fair
- Poor

**43. In general, how would you rate your overall mental or emotional health?**

- Excellent
- Very good
- Good
- Fair
- Poor

**44. What is the highest grade or level of school that you have completed?**

- 8th grade or less
- Some high school, but did not graduate
- High school or high school equivalency certificate
- College, CEGEP or other non-university certificate or diploma
- Undergraduate degree or some university
- Post-graduate degree or professional designation

**45. What is your gender?**

- Male
- Female
- Other

**46. What is your year of birth?**

(Please write in; for example, "1934.")

\_\_\_\_\_

**47. Was your most recent stay at this hospital for a childbirth experience?**

Yes

No

**48. The following question will help us to better understand the communities that we serve. Do you consider yourself to be . . .**

**(Check all that apply)**

White

Chinese

First Nation, Métis, Inuk or mixed (others may say Aboriginal or Indigenous)

South Asian (East Indian, Pakistani, Sri Lankan, etc.)

Black

Filipino

Latin American

Southeast Asian (Vietnamese, Cambodian, Malaysian, Laotian, etc.)

Arab

West Asian (Iranian, Afghan, etc.)

Korean

Japanese

Other

**49. Is there anything else you would like to share about your hospital stay?**

Questions 1 to 22 and 43 are adapted from the HCAHPS (Hospital Consumer Assessment of Healthcare Providers and Systems) questionnaire.

Questions 23 to 49 (excluding question 43) were adapted and/or developed by the Canadian Institute for Health Information in consultation with an interjurisdictional committee of experts.

**Reporting Checklist for Submitted Manuscript: Impact of patient characteristics on the Canadian Patient Experiences Survey – Inpatient Care survey- analysis from an academic tertiary care centre**

**Rubens FD et al.**

**BMJ Open 2018**

Based upon: Proposed Reporting Guidelines: Burns KE et al 2008. A guide for the design and conduct of self-administered surveys for clinicians. CMAJ 179;245-252

| <b>Paper Section</b> | <b>Question</b>                                                                              | <b>Identified in Text</b>                                         |
|----------------------|----------------------------------------------------------------------------------------------|-------------------------------------------------------------------|
| Abstract             | Is the objective clearly stated?                                                             | Page 2                                                            |
|                      | Is the design of the study stated?                                                           | Page 2                                                            |
|                      | Is the study setting well-described?                                                         | Page 2                                                            |
|                      | Is the survey population described?                                                          | Page 2                                                            |
|                      | Is the response rate reported?                                                               | No – not available                                                |
|                      | Are the outcome measures identified?                                                         | Page 2                                                            |
|                      | Are the main results clearly reported?                                                       | Page 2                                                            |
|                      | Are the conclusions appropriate?                                                             | Page 2                                                            |
| Introduction         | Is the problem clearly stated?                                                               | Pages 5-7                                                         |
|                      | Is the pertinent literature cited and critically appraised?                                  | Pages 5-7                                                         |
|                      | Is the relevance of the research question explained?                                         | Pages 5-7                                                         |
|                      | Is the objective clearly stated?                                                             | Pages 7-8                                                         |
| Methods              | Is the study design appropriate to the objective?                                            | Pages 8-9                                                         |
|                      | Is the setting clearly described?                                                            | Page 8                                                            |
|                      | Are the methods described clearly enough to permit other researchers to duplicate the study? | Pages 8-10                                                        |
|                      | Is the survey sample likely to be representative of the population?                          | Page 8                                                            |
|                      | Is the questionnaire described adequately?                                                   | Appendix                                                          |
|                      | Have the validity and reliability of the questionnaire been established?                     | Not applicable – survey developed elsewhere and validated by CIHI |
|                      | Was the questionnaire administered in a satisfactory way?                                    | Page 8                                                            |
|                      | Are the statistical methods used appropriately?                                              | Pages 9-10                                                        |
| Results              | Do the results address the objective?                                                        | Pages 10-12                                                       |
|                      | Are all the respondents accounted for?                                                       | Pages 10-12                                                       |
|                      | Are the results clearly and logically                                                        | Pages 10-12,                                                      |



|            |                                                             |                     |
|------------|-------------------------------------------------------------|---------------------|
|            | presented?                                                  | Figures 1-5, Tables |
|            | Are the tables and figures appropriate?                     | Figures 1-5, Tables |
|            | Are the numbers consistent in the text and the tables?      | Pages 10-12         |
| Discussion | Are the results succinctly summarized?                      | Page 12             |
|            | Are the implications of the results stated?                 | Pages 14-15         |
|            | Are other interpretations considered and refuted?           | Pages 15-16         |
|            | Are the limitations of the study and its results explained? | Pages 15-16         |
|            | Are appropriate conclusions drawn?                          | Page 16             |

## STROBE Statement—checklist of items that should be included in reports of observational studies

| Item No.            | Recommendation                                                                                                                                                                                                                                                                                                                                                                                                                                                                                                                                                                                                                                                                                       | Page No. | Relevant text from manuscript |
|---------------------|------------------------------------------------------------------------------------------------------------------------------------------------------------------------------------------------------------------------------------------------------------------------------------------------------------------------------------------------------------------------------------------------------------------------------------------------------------------------------------------------------------------------------------------------------------------------------------------------------------------------------------------------------------------------------------------------------|----------|-------------------------------|
| 1                   | (a) Indicate the study's design with a commonly used term in the title or the abstract                                                                                                                                                                                                                                                                                                                                                                                                                                                                                                                                                                                                               | 1        | 1, nos 3-5                    |
|                     | (b) Provide in the abstract an informative and balanced summary of what was done and what was found                                                                                                                                                                                                                                                                                                                                                                                                                                                                                                                                                                                                  | 2        |                               |
| <b>Introduction</b> |                                                                                                                                                                                                                                                                                                                                                                                                                                                                                                                                                                                                                                                                                                      |          |                               |
| 2                   | Explain the scientific background and rationale for the investigation being reported                                                                                                                                                                                                                                                                                                                                                                                                                                                                                                                                                                                                                 | 5-7      |                               |
| 3                   | State specific objectives, including any prespecified hypotheses                                                                                                                                                                                                                                                                                                                                                                                                                                                                                                                                                                                                                                     | 7-8      | 48-55, 3-11                   |
| <b>Methods</b>      |                                                                                                                                                                                                                                                                                                                                                                                                                                                                                                                                                                                                                                                                                                      |          |                               |
| 4                   | Present key elements of study design early in the paper                                                                                                                                                                                                                                                                                                                                                                                                                                                                                                                                                                                                                                              | 8-10     |                               |
| 5                   | Describe the setting, locations, and relevant dates, including periods of recruitment, exposure, follow-up, and data collection                                                                                                                                                                                                                                                                                                                                                                                                                                                                                                                                                                      | 8        |                               |
| 6                   | (a) <i>Cohort study</i> —Give the eligibility criteria, and the sources and methods of selection of participants. Describe methods of follow-up<br><i>Case-control study</i> —Give the eligibility criteria, and the sources and methods of case ascertainment and control selection. Give the rationale for the choice of cases and controls<br><i>Cross-sectional study</i> —Give the eligibility criteria, and the sources and methods of selection of participants<br><br>(b) <i>Cohort study</i> —For matched studies, give matching criteria and number of exposed and unexposed<br><i>Case-control study</i> —For matched studies, give matching criteria and the number of controls per case | 8        |                               |
| 7                   | Clearly define all outcomes, exposures, predictors, potential confounders, and effect modifiers. Give diagnostic criteria, if applicable                                                                                                                                                                                                                                                                                                                                                                                                                                                                                                                                                             | 8-10     |                               |
| 8*                  | For each variable of interest, give sources of data and details of methods of assessment (measurement). Describe comparability of assessment methods if there is more than one group                                                                                                                                                                                                                                                                                                                                                                                                                                                                                                                 | 8-10     |                               |
| 9                   | Describe any efforts to address potential sources of bias                                                                                                                                                                                                                                                                                                                                                                                                                                                                                                                                                                                                                                            | 10       |                               |
| 10                  | Explain how the study size was arrived at                                                                                                                                                                                                                                                                                                                                                                                                                                                                                                                                                                                                                                                            | N/A      |                               |

Continued on next page

|                        |     |                                                                                                                                                                                                              |                   |
|------------------------|-----|--------------------------------------------------------------------------------------------------------------------------------------------------------------------------------------------------------------|-------------------|
| Quantitative variables | 11  | Explain how quantitative variables were handled in the analyses. If applicable, describe which groupings were chosen and why                                                                                 | 8-10              |
| Statistical methods    | 12  | (a) Describe all statistical methods, including those used to control for confounding                                                                                                                        | 10                |
|                        |     | (b) Describe any methods used to examine subgroups and interactions                                                                                                                                          | 10                |
|                        |     | (c) Explain how missing data were addressed                                                                                                                                                                  | 10                |
|                        |     | (d) <i>Cohort study</i> —If applicable, explain how loss to follow-up was addressed                                                                                                                          | N/A               |
|                        |     | <i>Case-control study</i> —If applicable, explain how matching of cases and controls was addressed                                                                                                           | N/A               |
|                        |     | <i>Cross-sectional study</i> —If applicable, describe analytical methods taking account of sampling strategy                                                                                                 | N/A               |
|                        |     | (e) Describe any sensitivity analyses                                                                                                                                                                        | N/A               |
| <b>Results</b>         |     |                                                                                                                                                                                                              |                   |
| Participants           | 13* | (a) Report numbers of individuals at each stage of study—eg numbers potentially eligible, examined for eligibility, confirmed eligible, included in the study, completing follow-up, and analysed            | 10                |
|                        |     | (b) Give reasons for non-participation at each stage                                                                                                                                                         | N/A               |
|                        |     | (c) Consider use of a flow diagram                                                                                                                                                                           | N/A               |
| Descriptive data       | 14* | (a) Give characteristics of study participants (eg demographic, clinical, social) and information on exposures and potential confounders                                                                     | Table 1           |
|                        |     | (b) Indicate number of participants with missing data for each variable of interest                                                                                                                          | 10                |
|                        |     | (c) <i>Cohort study</i> —Summarise follow-up time (eg, average and total amount)                                                                                                                             | <del>10</del>     |
| Outcome data           | 15* | <i>Cohort study</i> —Report numbers of outcome events or summary measures over time                                                                                                                          |                   |
|                        |     | <i>Case-control study</i> —Report numbers in each exposure category, or summary measures of exposure                                                                                                         | 10-12, tables 2-5 |
|                        |     | <i>Cross-sectional study</i> —Report numbers of outcome events or summary measures                                                                                                                           |                   |
| Main results           | 16  | (a) Give unadjusted estimates and, if applicable, confounder-adjusted estimates and their precision (eg, 95% confidence interval). Make clear which confounders were adjusted for and why they were included | Tables 2-5        |
|                        |     | (b) Report category boundaries when continuous variables were categorized                                                                                                                                    | 10                |
|                        |     | (c) If relevant, consider translating estimates of relative risk into absolute risk for a meaningful time period                                                                                             | N/A               |

Continued on next page

1  
2  
3  
4  
5  
6  
7  
8  
9  
10  
11  
12  
13  
14  
15  
16  
17  
18  
19  
20  
21  
22  
23  
24  
25  
26  
27  
28  
29  
30  
31  
32  
33  
34  
35  
36  
37  
38  
39  
40  
41  
42  
43  
44  
45  
46  
47  
48  
49  
50  
51  
52  
53  
54  
55  
56  
57  
58  
59  
60



|                          |    |                                                                                                                                                                            |                                    |
|--------------------------|----|----------------------------------------------------------------------------------------------------------------------------------------------------------------------------|------------------------------------|
| Other analyses           | 17 | Report other analyses done—eg analyses of subgroups and interactions, and sensitivity analyses                                                                             | 12                                 |
| <b>Discussion</b>        |    |                                                                                                                                                                            |                                    |
| Key results              | 18 | Summarise key results with reference to study objectives                                                                                                                   | 12-13                              |
| Limitations              | 19 | Discuss limitations of the study, taking into account sources of potential bias or imprecision. Discuss both direction and magnitude of any potential bias                 | 16                                 |
| Interpretation           | 20 | Give a cautious overall interpretation of results considering objectives, limitations, multiplicity of analyses, results from similar studies, and other relevant evidence | 12-17                              |
| Generalisability         | 21 | Discuss the generalisability (external validity) of the study results                                                                                                      | 12-17                              |
| <b>Other information</b> |    |                                                                                                                                                                            |                                    |
| Funding                  | 22 | Give the source of funding and the role of the funders for the present study and, if applicable, for the original study on which the present article is based              | No funding source indicated on the |

\*Give information separately for cases and controls in case-control studies and, if applicable, for exposed and unexposed groups in cohort and cross-sectional studies.

**Note:** An Explanation and Elaboration article discusses each checklist item and gives methodological background and published examples of transparent reporting. The STROBE checklist is best used in conjunction with this article (freely available on the Web sites of PLoS Medicine at <http://www.plosmedicine.org/>, Annals of Internal Medicine at <http://www.annals.org/>, and Epidemiology at <http://www.epidem.com/>). Information on the STROBE Initiative is available at [www.strobe-statement.org](http://www.strobe-statement.org).
